# Supplementary material for: INFOGEST Digestion Assay of Raw and Roasted Hazelnuts and Its Impact on Allergens and Their IgE Binding Activity
Source: MDPI journal article supplement (doi:10.3390/foods11182914), 2022-09-19
Supplement: s1 [file s1]

Summary

Spot 11 from RAW digested hazelnut

1. Notes

imam cor a 8, cor a 9, cor a 11 i 2s albumine

2. Result Statistics

Figure 1. False discovery rate (FDR) curve. X axis is the number of peptides being kept. Y axis is the corresponding FDR.

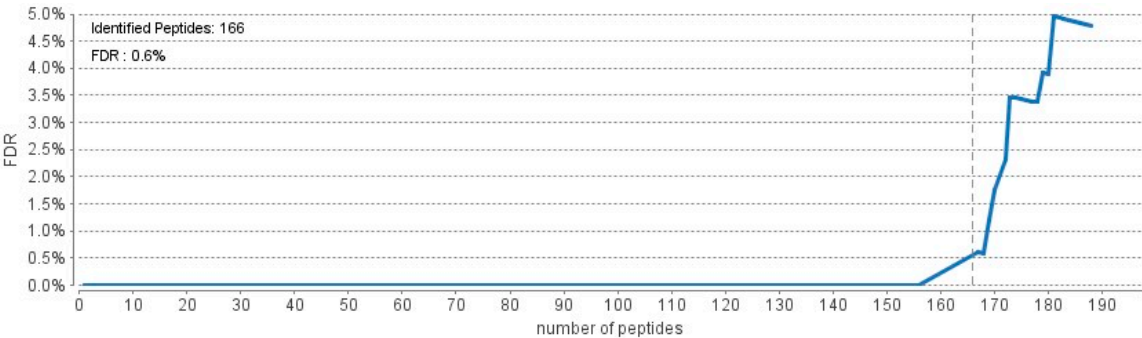

Figure 2. PSM score distribution. (a) Distribution of PEAKS peptide score; (b) Scatterplot of PEAKS peptide score versus precursor mass error.

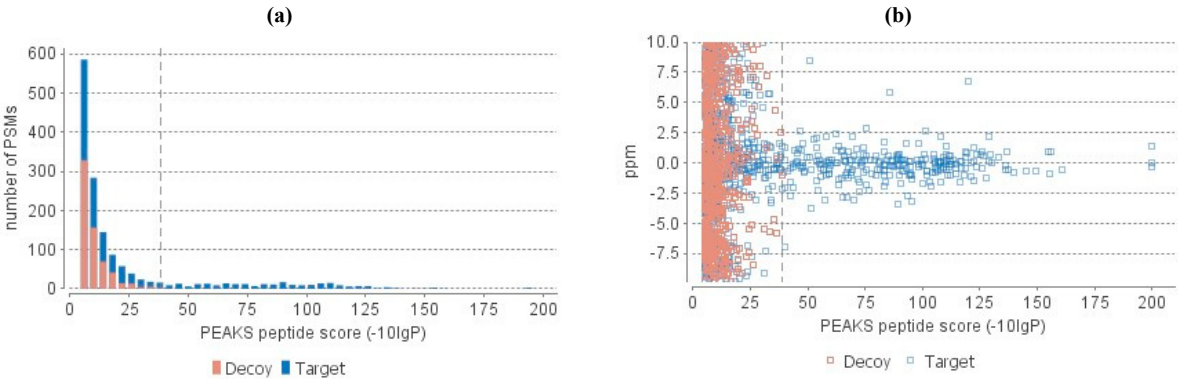

Table 1. Statistics of data.

|       | #Scans |       |          | #Features | Identified |        |             | #Peptides | #Sequences | #Proteins* |     |     |
|-------|--------|-------|----------|-----------|------------|--------|-------------|-----------|------------|------------|-----|-----|
|       | MS1    | MS/MS | #Chimera |           | #PSMs      | #Scans | #Features** |           |            | Groups     | All | Top |
| Total | 3976   | 5017  | 13       | 3904      | 258        | 256    | 127         | 166       | 144        | 5          | 8   | 7   |

|                      |      |      |    |      |     |     |     |     |     |   |          |   |
|----------------------|------|------|----|------|-----|-----|-----|-----|-----|---|----------|---|
| 1/21, 1:24 PM        |      |      |    |      |     |     |     |     |     |   | proteins |   |
| gastric<br>RAW<br>11 | 3976 | 5017 | 13 | 3904 | 258 | 256 | 127 | 166 | 144 | 5 | 8        | 7 |

\* proteins with significant peptides are used in counts.  
\*\* features are identified by DB search only.

Figure 3. Sample overlap for Proteins and Peptides (up to 8 samples). (a) All Proteins; (b) Top Proteins; (c) Peptides; ?

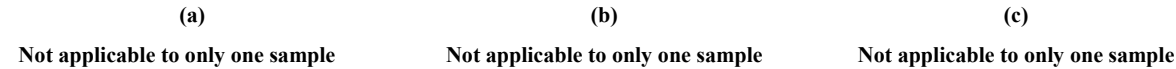

Figure 4. Distribution of peptide feature detection. (a) Feature m/z distribution; (b) Feature RT distribution.

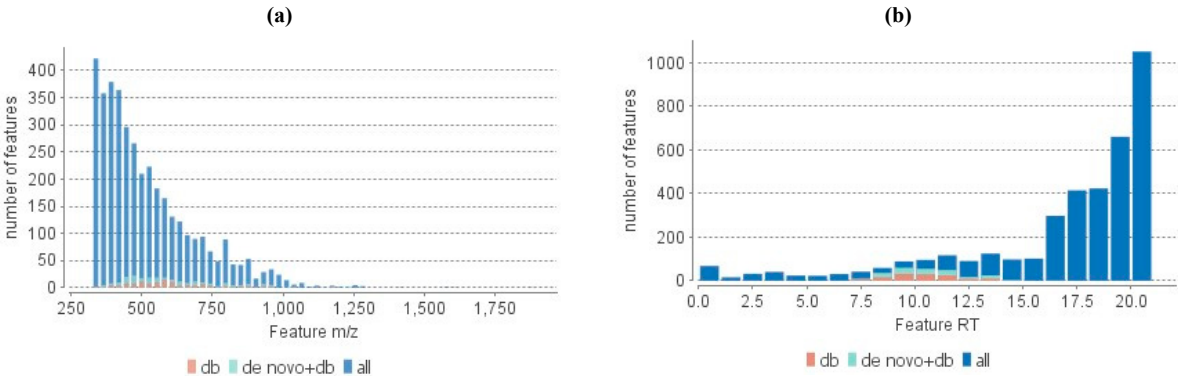

Figure 5. Distribution of identified peptide features. (a) Feature abundance distribution; (b) *De novo* sequencing validation. ?

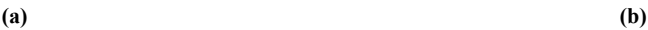

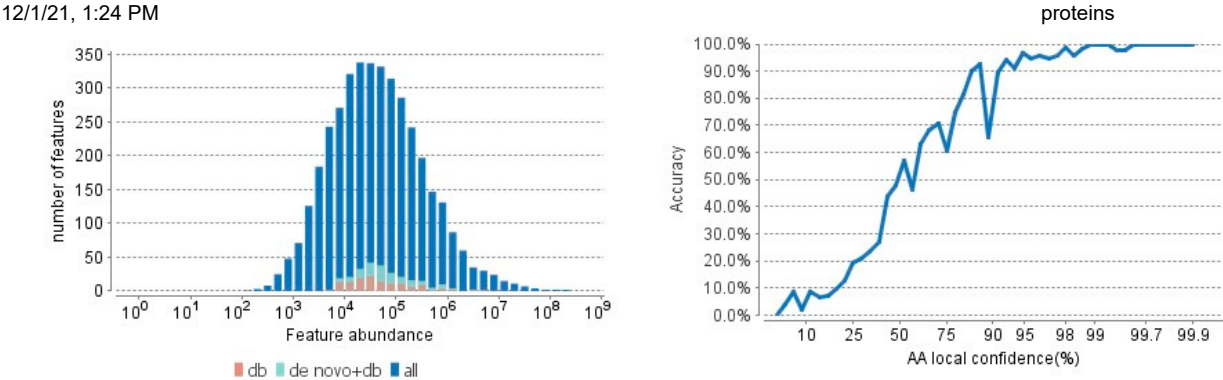

**Table 2.** Result filtration parameters.

|                  |       |
|------------------|-------|
| Peptide -10lgP   | ≥38.6 |
| PTM AScore       | ≥20   |
| Protein -10lgP   | ≥20   |
| De novo score(%) | ≥50%  |

**Table 3.** Statistics of filtered result.

|                                |         |
|--------------------------------|---------|
| FDR (Peptide-Spectrum Matches) | 0.4%    |
| FDR (Peptide Sequences)        | 0.6%    |
| FDR (Protein Group)            | 0.0% De |
| Novo Only Spectra              | 239     |

3. Experiment Control

**Figure 6.** Precursor mass error of peptide-spectrum matches (PSM) in filtered result. (a) Distribution of precursor mass error in ppm; (b) Scatterplot of precursor m/z versus precursor mass error in ppm.

(a)

(b)

|                          |         |          |                       |        |           |         |
|--------------------------|---------|----------|-----------------------|--------|-----------|---------|
| Proteins unique peptides |         | ≥1       | Table 4. PTM profile. |        |           |         |
| Name                     | ΔMass   | Position | #PSM                  | -10lgP | Abundance | AScore  |
| Carbamidomethyl          | 57.02   | C        | 48                    | 155.73 | 2.06E5    | 1000.00 |
| Oxidation                | 15.99   | M        | 20                    | 200.00 | 1.38E6    | 1000.00 |
| Deamidation              | .98 NQ  | 18       | 128.72                | 3.31E5 | 32.28     |         |
| Methylation(KR)          | 14.02 K | 4        | 57.12                 | 9.07E4 | 1000.00   |         |

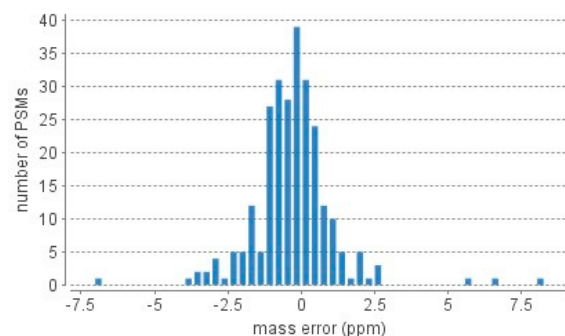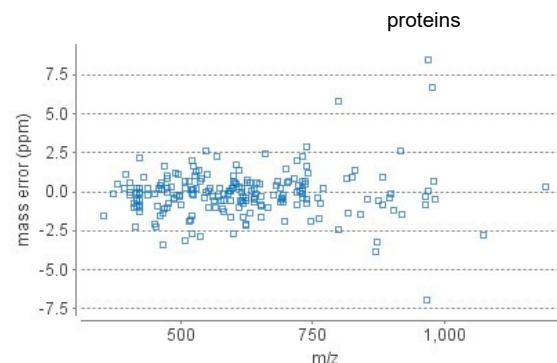

**Table 5.** Number of identified peptides in each sample by the number of missed cleavages.

Missed Cleavages 0 1 2 3 4+ gastric RAW 11 133 32 1 0 0

## 4. Other Information

**Table 6.** Search parameters.

PEAKS Version: PEAKS Studio 10.6 build 20201015

Search Engine Name: PEAKS

Parent Mass Error Tolerance: 10.0 ppm

Fragment Mass Error Tolerance: 0.02 Da

Precursor Mass Search Type: monoisotopic

Enzyme: Trypsin

Max Missed Cleavages: 2

Digest Mode: Semispecific

Fixed Modifications:

Carbamidomethylation: 57.02

Variable Modifications:

Oxidation (M): 15.99

Deamidation (NQ): 0.98

Acetylation (K): 42.01

Acetylation (Protein N-term): 42.01

Acetylation (N-term): 42.01

Amidation: -0.98

Beta-methylthiolation: 45.99

Biotinylation: 226.08 and

303 more...

Max Variable PTM Per Peptide: 3

Database: Corylus aveliana iz 2020 od 156 KB

Taxon: All

Contaminant Database: crap

**Table 7.** Instrument parameters.

Fractions: 11y.raw

Ion Source: ESI(nano-spray)

Fragmentation Mode: CID, CAD(y and b ions)

MS Scan Mode: FT-ICR/Orbitrap

MS/MS Scan Mode: FT-ICR/Orbitrap

12/1/21, 1:24 PM

proteins

Searched Entry: 602  
 FDR Estimation: Enabled  
 De novo score(%) threshold: 15  
 Peptide hit threshold (-10logP): 30.0  
 Peaks run ID: 139  
 Merge Options: no merge  
 Precursor Options: corrected  
 Charge Options: no correction  
 Filter m/z: 200.0 - 2000.0  
 Filter Charge: 2 - 8  
 Process: true  
 Associate chimera: yes

## Protein List

Protein Accession Contains:

Protein Description Contains:

Protein Sample Area &gt;=

Protein PTM Contains:

| Protein Group    | Protein ID | Accession                                   | -10lgP | Coverage (%) | Coverage (%) gastric RAW 11 | Area gastric RAW 11 | #Peptides | #Unique | #Spec gastric RAW 11 | PTM | Avg. Mass | Description                                                                        |
|------------------|------------|---------------------------------------------|--------|--------------|-----------------------------|---------------------|-----------|---------|----------------------|-----|-----------|------------------------------------------------------------------------------------|
| 2                | 10069      | <a href="#">sp Q9ATH2 NLTP_CORAV</a>        | 389.70 | 67           | 67                          | 6.332E6             | 16        | 16      | 52                   | Y   | 11806     | Non-specific lipid-transfer protein Cor a 8 OS=Corylus avellana OX=13451 PE=1 SV=1 |
| 8                | 10065      | <a href="#">A0A0A0P7E3 A0A0A0P7E3_CORAV</a> | 279.17 | 11           | 11                          | 3.1802E5            | 5         | 5       | 8                    | Y   | 58837     | Cor a 9 allergen OS=Corylus avellana OX=13451 PE=2 SV=1                            |
| 13               | 9619       | <a href="#">Q8S4P9 Q8S4P9_CORAV</a>         | 83.52  | 2            | 2                           | 1.3694E4            | 1         | 1       | 1                    | N   | 50856     | 48-kDa glycoprotein OS=Corylus avellana OX=13451 PE=2 SV=1                         |
| 12               | 10123      | <a href="#">D0PWG2 D0PWG2_CORAV</a>         | 59.32  | 8            | 8                           | 2.5304E4            | 1         | 1       | 1                    | Y   | 17078     | 2S albumin OS=Corylus avellana OX=13451 PE=2 SV=1                                  |
| 14               | 10126      | <a href="#">C7A7M8 C7A7M8_CORAV</a>         | 40.07  | 5            | 5                           | 0                   | 1         | 1       | 1                    | N   | 18859     | Kinase-like protein (Fragment) OS=Corylus avellana OX=134 51 PE=4 SV=1             |
| 14               | 10125      | <a href="#">C7A7M9 C7A7M9_CORAV</a>         | 40.07  | 5            | 5                           | 0                   | 1         | 1       | 1                    | N   | 18844     | Kinase-like protein (Fragment) OS=Corylus avellana OX=134 51 PE=4 SV=1             |
| 14               | 10161      | <a href="#">C7A7N3 C7A7N3_CORAV</a>         | 40.07  | 5            | 5                           | 0                   | 1         | 1       | 1                    | N   | 18338     | Kinase-like protein (Fragment) OS=Corylus avellana OX=134 51 PE=4 SV=1             |
| total 7 proteins |            |                                             |        |              |                             |                     |           |         |                      |     |           |                                                                                    |

[sp|Q9ATH2|NLTP\\_CORAV](#)
[back to list](#)
[| Protein Coverage](#) | [Supporting Peptides](#) |

Protein Coverage:

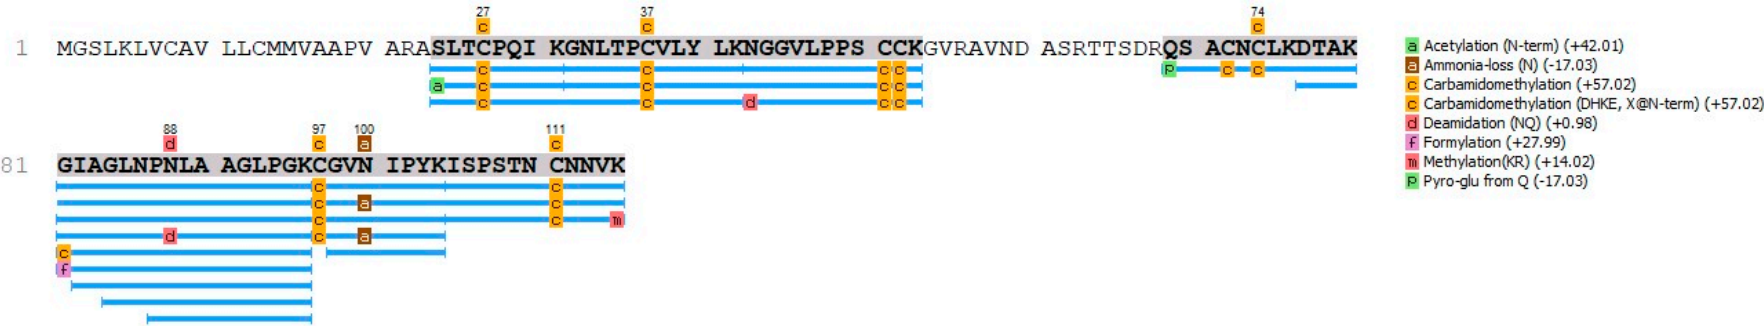

Supporting Peptides:

| Peptide                          | Uniq | <sup>-</sup> 10lgP | Mass      | Length | ppm | m/z      | z | RT    | Fraction | Scan | Source File | Area gastric RAW 11 | #Feature | #Feature gastric RAW 11 | Start | End | PTM                  | AScore                                                            | Found By |
|----------------------------------|------|--------------------|-----------|--------|-----|----------|---|-------|----------|------|-------------|---------------------|----------|-------------------------|-------|-----|----------------------|-------------------------------------------------------------------|----------|
| K.C(+57.02)GVNIPYK.I             | Y    | 136.65             | 949.4691  | 8      | 0.9 | 475.7422 | 2 | 10.00 | 5        | 3949 | 11y.raw     | 6.1132E4            | 1        | 1                       | 97    | 104 | Carbamidomethylation | C1:Carbamidomethylation:1000.00                                   | PEAKS DB |
| K.GIAGLNPNLAAGLPGK.C             | Y    | 130.11             | 1461.8303 | 16     | 0.1 | 731.9225 | 2 | 11.91 | 5        | 4706 | 11y.raw     | 2.6234E6            | 1        | 1                       | 81    | 96  |                      |                                                                   | PEAKS DB |
| K.GIAGLNPN(+.98)LAAGLPGK.C       | Y    | 128.72             | 1462.8143 | 16     | 2.2 | 732.4161 | 2 | 12.13 | 5        | 4794 | 11y.raw     | 3.3091E5            | 1        | 1                       | 81    | 96  | Deamidation (NQ)     | N8:Deamidation (NQ):32.28                                         | PEAKS DB |
| K.DTAKGIAGLNPNLAAGLPGK.C         | Y    | 126.30             | 1877.0370 | 20     | 0.6 | 626.6866 | 3 | 11.55 | 5        | 4569 | 11y.raw     | 8.3572E3            | 1        | 1                       | 77    | 96  |                      |                                                                   | PEAKS DB |
| K.GNLTPC(+57.02)VLYLK.N          | Y    | 116.88             | 1276.6849 | 11     | 0.4 | 639.3495 | 2 | 11.88 | 5        | 4683 | 11y.raw     | 6.9964E5            | 1        | 1                       | 32    | 42  | Carbamidomethylation | C6:Carbamidomethylation:1000.00                                   | PEAKS DB |
| K.NGGVLPSPSC(+57.02)C(+57.02)K.G | Y    | 112.06             | 1187.5427 | 11     | 0.1 | 594.7787 | 2 | 8.79  | 5        | 3465 | 11y.raw     | 7.5541E3            | 1        | 1                       | 43    | 53  | Carbamidomethylation | C9:Carbamidomethylation:1000.00; C10:Carbamidomethylation:1000.00 | PEAKS DB |
| A.GLNPNLAAGLPGK.C                | Y    | 111.13             | 1220.6876 | 13     | 1.0 | 611.3505 | 2 | 10.96 | 5        | 4344 | 11y.raw     | 8.5495E4            | 1        | 1                       | 84    | 96  |                      |                                                                   | PEAKS DB |
| K.GIAGLN(+.98)PNLAAGLPGK.C       | Y    | 107.86             | 1462.8143 | 16     | 2.2 | 732.4161 | 2 | 12.13 | 5        | 4831 | 11y.raw     | 3.3091E5            | 1        | 1                       | 81    | 96  |                      | N6:Deamidation (NQ):14.04                                         | PEAKS DB |
| K.ISPSTNC(+57.02)NNVK            | Y    | 107.15             | 1232.5819 | 11     | 0.0 | 617.2982 | 2 | 7.80  | 5        | 3076 | 11y.raw     | 3.8069E5            | 1        | 1                       | 105   | 115 | Carbamidomethylation | C7:Carbamidomethylation:1000.00                                   | PEAKS DB |

total 28 peptides

|                             |   |        |           |    |      |          |   |      |   |      |         |          |   |   |     |     |                      |                                                                               |             |
|-----------------------------|---|--------|-----------|----|------|----------|---|------|---|------|---------|----------|---|---|-----|-----|----------------------|-------------------------------------------------------------------------------|-------------|
| K.ISPSTNC(+57.02)N(+.98)NVK | Y | 102.01 | 1233.5659 | 11 | -0.7 | 617.7898 | 2 | 7.97 | 5 | 3146 | 11y.raw | 1.3829E5 | 1 | 1 | 105 | 115 | Carbamidomethylation | C7:Carbamido<br>methylation:1<br>000.00;<br>N8:Deamidatio<br>n (NQ):<br>17.01 | PEAKS<br>DB |
|-----------------------------|---|--------|-----------|----|------|----------|---|------|---|------|---------|----------|---|---|-----|-----|----------------------|-------------------------------------------------------------------------------|-------------|

| Peptide                                  | Uniq | <sup>10</sup> lgP | Mass      | Length | ppm  | m/z      | z | RT    | Fraction | Scan | Source<br>File | Area<br>gastric<br>RAW 11 | #Feature | #Feature<br>gastric<br>RAW 11 | Start | End | PTM                                       | AScore                                                                                                                           | Found<br>By  |
|------------------------------------------|------|-------------------|-----------|--------|------|----------|---|-------|----------|------|----------------|---------------------------|----------|-------------------------------|-------|-----|-------------------------------------------|----------------------------------------------------------------------------------------------------------------------------------|--------------|
| A.SLTC(+57.02)PQIK.G                     | Y    | 92.31             | 945.4954  | 8      | 0.2  | 473.7551 | 2 | 9.38  | 5        | 3715 | 11y.raw        | 1.1619E6                  | 1        | 1                             | 24    | 31  | Carbamidomethylation                      | C4:Carbamido<br>methylation:1<br>000.00                                                                                          | PEAKS<br>DB  |
| K.ISPSTN(+.98)C(+57.02)NNVK              | Y    | 91.29             | 1233.5659 | 11     | -0.7 | 617.7898 | 2 | 7.97  | 5        | 3196 | 11y.raw        | 1.6453E5                  | 2        | 2                             | 105   | 115 | Carbamidomethylation                      | N6:Deamidatio<br>n (NQ):<br>14.04;<br>C7:Carbamido<br>methylation:1<br>000.00                                                    | PEAKS<br>DB  |
| K.N(+.98)GGVLPPSC(+57.02)C(+57.02)K.G    | Y    | 90.73             | 1188.5267 | 11     | -1.7 | 595.2697 | 2 | 9.70  | 5        | 3836 | 11y.raw        | 1.2809E4                  | 1        | 1                             | 43    | 53  | Deamidation (NQ);<br>Carbamidomethylation | N1:Deamidatio<br>n (NQ):<br>1000.00;<br>C9:Carbamido<br>methylation:1<br>000.00;<br>C10:Carbam<br>idomet<br>hylation:1000.<br>00 | PEAKS<br>DB  |
| R.Q(-17.03)SAC(+57.02)NC(+57.02)LKDTAK.G | Y    | 90.34             | 1377.6017 | 12     | 0.2  | 689.8083 | 2 | 8.71  | 5        | 3428 | 11y.raw        | 7.316E4                   | 1        | 1                             | 69    | 80  | Pyro-glu from Q;<br>Carbamidomethylation  | Q1:Pyr<br>o-glu fr<br>om Q:1<br>000.00;<br>C4:Carbamido<br>methylation:1<br>000.00;<br>C6:Carbamido<br>methylation:1<br>000.00   | PEAKS<br>PTM |
| A.SLTC(+57.02)PQIKGNLTPC(+57.02)VLYLK.N  | Y    | 89.84             | 2204.1697 | 19     | 0.7  | 735.7310 | 3 | 11.84 | 5        | 4688 | 11y.raw        | 2.2417E4                  | 1        | 1                             | 24    | 42  | Carbamidomethylation                      | C4:Carbamido<br>methylation:1<br>000.00;<br>C14:Carbamid<br>omethylation:1<br>000.00                                             | PEAKS<br>DB  |

total 28 peptides

|                                            |   |       |           |    |     |          |   |       |   |      |         |          |   |   |    |     |                      |                                                             |           |
|--------------------------------------------|---|-------|-----------|----|-----|----------|---|-------|---|------|---------|----------|---|---|----|-----|----------------------|-------------------------------------------------------------|-----------|
| K.GIAGLN(+.98)PNLAAGLPGKC(+57.02)GVNIPYK.I | Y | 85.46 | 2394.2729 | 24 | 5.8 | 799.1029 | 3 | 11.94 | 5 | 4738 | 11y.raw | 3.8441E4 | 1 | 1 | 81 | 104 | Carbamidomethylation | N6:Deamidation (NQ):14.04; C17:Carbamidomethylation:1000.00 | PEAKS DB  |
| K.G(+27.99)IAGLNPNAAGLPGK.C                | Y | 83.12 | 1489.8252 | 16 | 1.9 | 745.9185 | 2 | 13.48 | 5 | 5328 | 11y.raw | 0        | 0 | 0 | 81 | 96  | Formylation          | G1:Formylation:46.00                                        | PEAKS PTM |
| K.GIAGLNPNAAGLPGKC(+57.02)GVNIPYK.I        | Y | 72.72 | 2393.2888 | 24 | 2.4 | 798.7683 | 3 | 11.99 | 5 | 4738 | 11y.raw | 0        | 0 | 0 | 81 | 104 | Carbamidomethylation | C17:Carbamidomethylation:1000.00                            | PEAKS DB  |

| Peptide                                                  | Uniq | 10lgP | Mass      | Length | ppm | m/z       | z | RT    | Fraction | Scan | Source File | Area gastric RAW 11 | #Feature | #Feature gastric RAW 11 | Start | End | PTM                                    | AScore                                                                                                            | Found By  |
|----------------------------------------------------------|------|-------|-----------|--------|-----|-----------|---|-------|----------|------|-------------|---------------------|----------|-------------------------|-------|-----|----------------------------------------|-------------------------------------------------------------------------------------------------------------------|-----------|
| K.C(+57.02)GVN(-17.03)IPYK.I                             | Y    | 72.10 | 932.4426  | 8      | 1.4 | 467.2279  | 2 | 12.00 | 5        | 4755 | 11y.raw     | 1.9612E4            | 1        | 1                       | 97    | 104 | Carbamidomethylation; Ammonia-loss (N) | C1:Carbamidomethylation:1000.00; N4:Ammonia-loss (N):1000.00                                                      | PEAKS PTM |
| C.GVNIPYK.I                                              | Y    | 71.31 | 789.4385  | 7      | 1.1 | 395.7270  | 2 | 9.77  | 5        | 3856 | 11y.raw     | 0                   | 0        | 0                       | 98    | 104 |                                        |                                                                                                                   | PEAKS DB  |
| K.C(+57.02)GVN(-17.03)IPYKISPSTNC(+57.02)NNVK            | Y    | 65.18 | 2147.0139 | 19     | 2.8 | 1074.5112 | 2 | 11.62 | 5        | 4600 | 11y.raw     | 4.3208E4            | 2        | 2                       | 97    | 115 | Carbamidomethylation; Ammonia-loss (N) | C1:Carbamidomethylation:1000.00; N4:Ammonia-loss (N):74.64; C15:Carbamidomethylation:1000.00                      | PEAKS PTM |
| K.GNLTPC(+57.02)VLYLKN(+.98)GGVLPSPC(+57.02)C(+57.02)K.G | Y    | 63.25 | 2447.2012 | 22     | 1.4 | 816.7399  | 3 | 11.85 | 5        | 4684 | 11y.raw     | 0                   | 0        | 0                       | 32    | 53  | Carbamidomethylation                   | C6:Carbamidomethylation:1000.00; N12:Deamidation (NQ):3.41; C20:Carbamidomethylation:1000.00; C21:Carbamidomethyl | PEAKS DB  |

total 28 peptides



|                               |   |       |           |    |          |          |   |       |   |      |         |          |   |   |     |     |                                          |                                                                                                 |              |
|-------------------------------|---|-------|-----------|----|----------|----------|---|-------|---|------|---------|----------|---|---|-----|-----|------------------------------------------|-------------------------------------------------------------------------------------------------|--------------|
|                               |   |       |           |    |          |          |   |       |   |      |         |          |   |   |     |     |                                          | ation:1<br>000.00                                                                               |              |
| K.ISPSTNC(+57.02)NNVK(+14.02) | Y | 57.12 | 1246.5975 | 11 | -<br>0.6 | 624.3057 | 2 | 7.93  | 5 | 3135 | 11y.raw | 9.0708E4 | 1 | 1 | 105 | 115 | Carbamidomethylation;<br>Methylation(KR) | C7:Car<br>bamido<br>methyl<br>ation:1<br>000.00;<br>K11:Me<br>thylatio<br>n(KR):<br>1000.0<br>0 | PEAKS<br>PTM |
| G.IAGLNPPLAAGLPGK.C           | Y | 54.54 | 1404.8088 | 15 | 0.6      | 703.4121 | 2 | 11.74 | 5 | 4638 | 11y.raw | 0        | 0 | 0 | 82  | 96  |                                          |                                                                                                 | PEAKS<br>DB  |
| N.PNLAAGLPGK.C                | Y | 47.76 | 936.5392  | 10 | 1.6      | 469.2776 | 2 | 10.07 | 5 | 3973 | 11y.raw | 0        | 0 | 0 | 87  | 96  |                                          |                                                                                                 | PEAKS<br>DB  |
| K.G(+57.02)IAGLNPPLAAGLPGK.C  | Y | 47.29 | 1518.8518 | 16 | -<br>0.4 | 760.4329 | 2 | 11.89 | 5 | 4712 | 11y.raw | 1.7287E4 | 1 | 1 | 81  | 96  | Carbamidomethylation<br>(DHKE, X@N-term) | G1:Car<br>bamido<br>methyl<br>ation<br>(DHKE,<br>X@N-te<br>rm):36.<br>52                        | PEAKS<br>PTM |

total 28 peptides

| Peptide                             | Uniq | <sup>-</sup><br>10lgP | Mass      | Length | ppm                 | m/z      | z | RT    | Fraction | Scan | Source File | Area gastric RAW 11 | #Feature | #Feature gastric RAW 11 | Start | End | PTM                                        | AScore                                                                               | Found By  |
|-------------------------------------|------|-----------------------|-----------|--------|---------------------|----------|---|-------|----------|------|-------------|---------------------|----------|-------------------------|-------|-----|--------------------------------------------|--------------------------------------------------------------------------------------|-----------|
| A.S(+42.01)LTC(+57.02)PQIK.G        | Y    | 45.79                 | 987.5059  | 8      | 1.1                 | 494.7608 | 2 | 11.04 | 5        | 4372 | 11y.raw     | 8.612E3             | 1        | 1                       | 24    | 31  | Acetylation (N-term); Carbamidomethylation | S1:Acetylation (N-term):100 0.00;C4:Carbamidomethylation:1000.00                     | PEAKS PTM |
| K.ISPSTN(+.98)C(+57.02)NNVK(+14.02) | Y    | 43.40                 | 1247.5815 | 11     | <sup>-</sup><br>2.1 | 624.7968 | 2 | 8.09  | 5        | 3185 | 11y.raw     | 1.2981E4            | 2        | 2                       | 105   | 115 | Carbamidomethylation; Methylation(KR)      | N6:Deamidation (NQ):0.00;C7:Carbamidomethylation:1000.00;K11:Methylation(KR):1000.00 | PEAKS PTM |
| total 28 peptides                   |      |                       |           |        |                     |          |   |       |          |      |             |                     |          |                         |       |     |                                            |                                                                                      |           |

A0A0A0P7E3|A0A0A0P7E3\_CORAV

back to list

| [Protein Coverage](#) | [Supporting Peptides](#) |

Protein Coverage:

1MAKLILVSFS LCLLVLFNGC LGIDVGLRRQ QQRHFGECNL DRLNALEPTN RIEAEAGQIE SWDHNDQQFQ CAGVAVIRRT

81IEPNGLLLPQ YSNAPELIYI ERGRGITGVL FPGCPETFED PQQSQQQGQG QGQSQRSEQD RHQKIRYFQE GDIIALPAGV

161AHWCYNDGDS PVVAVSLLHT NNYANQLDEN PRHFYLAGNP DDEHQRRQGGQ QFGQRRRQQQ HSRGKEGEQE QQGEGNNVFS

241GFDAEFLADA FNVDVDTARR LQSNQDKRRN IVKVEGRLQM VRPERSRQEW ERQERQERES EQERERQRRQ GGRGRDVNGF

321EETICSLRLM ENIGSRSRAD IYTEQVGRIN TVNSNTLPVL RWLQLSAERG DLQREGLYVP HWNLNAHSVV YAIRGRARVQ

401VVDDNGNTVF DDELRRGGVL TIPQNFATAK RAESGFEWV AFKTDNNAQI SPLAGRTSAI RALPDDVLAN AFQISRREAR

481RLKYNRQETT LARSSRSSE RMRRRSESEG RAEA

Carbamidomethylation (+57.02)

Oxidation (M) (+15.99)

Supporting Peptides:

| Peptide                | Uniq | <sup>-</sup><br>10lgP | Mass      | Length | ppm                 | m/z      | z | RT    | Fraction | Scan | Source File | Area gastric RAW 11 | #Feature | #Feature gastric RAW 11 | Start | End | PTM                  | AScore                          | Found By |
|------------------------|------|-----------------------|-----------|--------|---------------------|----------|---|-------|----------|------|-------------|---------------------|----------|-------------------------|-------|-----|----------------------|---------------------------------|----------|
| R.ALPPDVLANAFQISR.E    | Y    | 154.93                | 1628.8522 | 15     | 0.9                 | 815.4341 | 2 | 13.42 | 5        | 5305 | 11y.raw     | 1.0909E5            | 1        | 1                       | 462   | 476 |                      |                                 | PEAKS DB |
| R.INTVNSNTLPVLR.W      | Y    | 114.70                | 1439.8096 | 13     | <sup>-</sup><br>0.9 | 720.9114 | 2 | 11.23 | 5        | 4438 | 11y.raw     | 1.4575E5            | 1        | 1                       | 349   | 361 |                      |                                 | PEAKS DB |
| R.LM(+15.99)ENIGSR.S   | Y    | 89.58                 | 934.4542  | 8      | <sup>-</sup><br>3.4 | 468.2328 | 2 | 8.43  | 5        | 3321 | 11y.raw     | 0                   | 0        | 0                       | 329   | 336 | Oxidation (M)        | M2:Oxidation (M):100 0.00       | PEAKS DB |
| N.GFEETIC(+57.02)SLR.L | Y    | 83.13                 | 1210.5652 | 10     | 1.7                 | 606.2909 | 2 | 11.47 | 5        | 4542 | 11y.raw     | 2.2967E4            | 1        | 1                       | 319   | 328 | Carbamidomethylation | C7:Carbamidomethylation:1000.00 | PEAKS DB |
| R.ADIYEQVGR.I          | Y    | 81.23                 | 1150.5618 | 10     | <sup>-</sup><br>0.6 | 576.2878 | 2 | 9.72  | 5        | 3835 | 11y.raw     | 1.6183E4            | 1        | 1                       | 339   | 348 |                      |                                 | PEAKS DB |

|                         |   |       |           |    |     |          |   |       |   |      |         |          |   |   |     |     |  |                           |          |
|-------------------------|---|-------|-----------|----|-----|----------|---|-------|---|------|---------|----------|---|---|-----|-----|--|---------------------------|----------|
| R.INTVN(+.98)SNTLPVLR.W | Y | 54.10 | 1440.7936 | 13 | 2.0 | 721.4055 | 2 | 11.53 | 5 | 4560 | 11y.raw | 2.4038E4 | 1 | 1 | 349 | 361 |  | N5:Deamidation (NQ): 0.00 | PEAKS DB |
| total 6 peptides        |   |       |           |    |     |          |   |       |   |      |         |          |   |   |     |     |  |                           |          |

Q8S4P9|Q8S4P9\_CORAV

[back to list](#)

| [Protein Coverage](#) | [Supporting Peptides](#) |

Protein Coverage:

1 MLPKEDPELK KCKHKCRDER QFDEQQRRDG KQICEEKARE RQQEEGNSSE ESYGKEQEEN PYVFQDEHFE SRVKTEEGRV  
81 QVLENFTKRS RLLSGIENFR LAILEANPHT FISPAHFDAE LVLFAKGRA TITMVREEKR ESNVEHGDI IRIPAGTPVY  
161 MINRDENEKL FIVKILQPVs APGHFEAFYG AGGEDPESFY RAFSWEVLEA ALKVRREQLE KVFGEQSKGS IVKASREKIR  
241 ALSQHEEGPP RIWPFGGESS GPINLLHKHP SQSNQFGRLY EAHPPDDHKQL QDLMLVSFA NITKGSMA GP YNSRATKIS  
321 VVVEGEGFFE MACPHLSSSS GSYQKISARL RRGVVFVAPA GHPVAVIASQ NNNLQVLCFE VNAHGNSRFP LAGKGNIVNE  
401 FERDAKELAF NLPSREVERI FKNQDQAFFP PGPKNQQEEG GRGGRAFE

Supporting Peptides:

| Peptide          | Uniq | -10lgP | Mass      | Length | ppm | m/z      | z | RT    | Fraction | Scan | Source File | Area gastric RAW 11 | #Feature | #Feature gastric RAW 11 | Start | End | PTM | AScore | Found By |
|------------------|------|--------|-----------|--------|-----|----------|---|-------|----------|------|-------------|---------------------|----------|-------------------------|-------|-----|-----|--------|----------|
| K.GNIVNEFER.D    | Y    | 83.52  | 1076.5250 | 9      | 0.9 | 539.2703 | 2 | 10.78 | 5        | 4253 | 11y.raw     | 1.3694E4            | 1        | 1                       | 395   | 403 |     |        | PEAKS DB |
| total 1 peptide: |      |        |           |        |     |          |   |       |          |      |             |                     |          |                         |       |     |     |        |          |

D0PWG2|D0PWG2\_CORAV

[back to list](#)

| [Protein Coverage](#) | [Supporting Peptides](#) |

Protein Coverage:

1 MARLATLAAL FAALLLVAAH AAFRTTITTV DVDEDIVNQ GRRGESCREQ AQRQQNLNQC QRYMRQQSQY GSYDGSNQQQ  Oxidation (M) (+15.99)  
81 QQELEQCCQQ LRQMDERCRC EGLRQAVMQQ QGEMRGEEMR EVMETARDLP NQCRLSPQRC EIRSARF

Supporting Peptides:

| Peptide                  | Uniq | -10lgP | Mass      | Length | ppm | m/z      | z | RT   | Fraction | Scan | Source File | Area gastric RAW 11 | #Feature | #Feature gastric RAW 11 | Start | End | PTM           | AScore                    | Found By |
|--------------------------|------|--------|-----------|--------|-----|----------|---|------|----------|------|-------------|---------------------|----------|-------------------------|-------|-----|---------------|---------------------------|----------|
| R.YM(+15.99)RQQSQYGSYD.G | Y    | 59.32  | 1540.6252 | 12     | 0.2 | 771.3201 | 2 | 8.81 | 5        | 3472 | 11y.raw     | 2.5304E4            | 1        | 1                       | 63    | 74  | Oxidation (M) | M2:Oxidation (M):100 0.00 | PEAKS DB |
| total 1 peptides         |      |        |           |        |     |          |   |      |          |      |             |                     |          |                         |       |     |               |                           |          |

C7A7M8|C7A7M8\_CORAV

[back to list](#)

| [Protein Coverage](#) | [Supporting Peptides](#) |

Protein Coverage:

1 YKGILDQEK R MVAVKVLNLQ QKGASKSFMA ECNALRNIRH RNLVKILTCC SSVDYKGNEF KALVYEFMAN GNLDKWLHHD  
81 RENESPQRYL NLLQRLNIAI DVASSLHYLH DYCETPIIHC DLKPSNVLLD DDMIKVSDF GLARILFATN DDSQNQTSTA  
161 GIKGTI

Supporting Peptides:

| Peptide      | Uniq | -10lgP | Mass     | Length | ppm | m/z      | z | RT    | Fraction | Scan | Source File | Area gastric RAW 11 | #Feature | #Feature gastric RAW 11 | Start | End | PTM | AScore | Found By |
|--------------|------|--------|----------|--------|-----|----------|---|-------|----------|------|-------------|---------------------|----------|-------------------------|-------|-----|-----|--------|----------|
| K.RMVAVKVL.N | Y    | 40.07  | 914.5735 | 8      | 0.2 | 458.2942 | 2 | 16.69 | 5        | 6605 | 11y.raw     | 0                   | 0        | 0                       | 10    | 17  |     |        | PEAKS DB |

total 1 peptides

C7A7M9|C7A7M9\_CORAV  
| Protein Coverage | Supporting Peptides |

[back to list](#)

Protein Coverage:

1 YKGILDQEK**R MVAVKVL**NLQ QKGASKSFMA ECNALRNIRH RNLVKILTCC SSVDYNGNEF KALVYEFMAN GNLDKWLHHD  
81 RENESPQRYL NLLQRLNIAI DVASSLHYLH DYCETPIIHC DLKPSNVLLD DDMIAKVSDF GLARILFATN DDSQNQTSTA  
161 GIKGTI

Supporting Peptides:

| Peptide          | Uniq | -10lgP | Mass     | Length | ppm | m/z      | z | RT    | Fraction | Scan | Source File | Area 11 | gastric RAW | #Feature | #Feature 11 | gastric RAW | Start | End | PTM | AScore | Found By |
|------------------|------|--------|----------|--------|-----|----------|---|-------|----------|------|-------------|---------|-------------|----------|-------------|-------------|-------|-----|-----|--------|----------|
| K.RMVAVKVL.N     | Y    | 40.07  | 914.5735 | 8      | 0.2 | 458.2942 | 2 | 16.69 | 5        | 6605 | 11y.raw     | 0       |             | 0        |             | 0           | 10    | 17  |     |        | PEAKS DB |
| total 1 peptides |      |        |          |        |     |          |   |       |          |      |             |         |             |          |             |             |       |     |     |        |          |

C7A7N3|C7A7N3\_CORAV

[back to list](#)

| Protein Coverage | Supporting Peptides |

Protein Coverage:

1 ILDK**RMVA VKVL**NLQQKG ASKSFMAECN ALRNIRHRNL VKILTCCSSV DYKGNEFKAL VYEFMENGNL DKWLHHDRDN  
81 ESPPRYLNLL QRLNIAIDVA SSLHYLHDHC ETPIIHCDLK PSNVLLDDDM IAKVSDFGLA RIISTTNDAS QNQTSTVGIK  
161 GT

Supporting Peptides:

| Peptide          | Uniq | -10lgP | Mass     | Length | ppm | m/z      | z | RT    | Fraction | Scan | Source File | Area 11 | gastric RAW | #Feature | #Feature 11 | gastric RAW | Start | End | PTM | AScore | Found By |
|------------------|------|--------|----------|--------|-----|----------|---|-------|----------|------|-------------|---------|-------------|----------|-------------|-------------|-------|-----|-----|--------|----------|
| K.RMVAVKVL.N     | Y    | 40.07  | 914.5735 | 8      | 0.2 | 458.2942 | 2 | 16.69 | 5        | 6605 | 11y.raw     | 0       |             | 0        |             | 0           | 7     | 14  |     |        | PEAKS DB |
| total 1 peptides |      |        |          |        |     |          |   |       |          |      |             |         |             |          |             |             |       |     |     |        |          |

[Peptide List](#)

## Summary

Spot 12 from RAW digested hazelnut

# 1. Notes

Only Cor a 8

## 2. Result Statistics

**Figure 1.** False discovery rate (FDR) curve. X axis is the number of peptides being kept. Y axis is the corresponding FDR. [?](#)

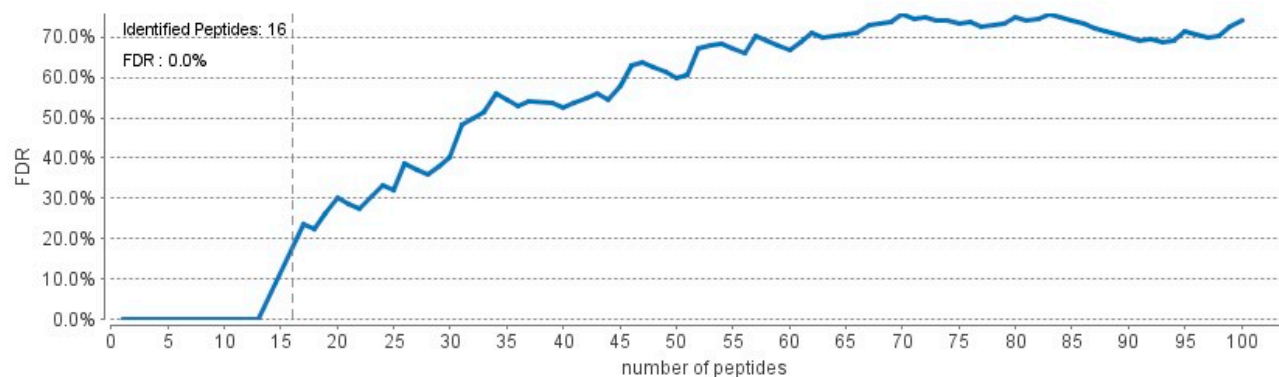

**Figure 2.** PSM score distribution. (a) Distribution of PEAKS peptide score; (b) Scatterplot of PEAKS peptide score versus precursor mass error. [?](#)

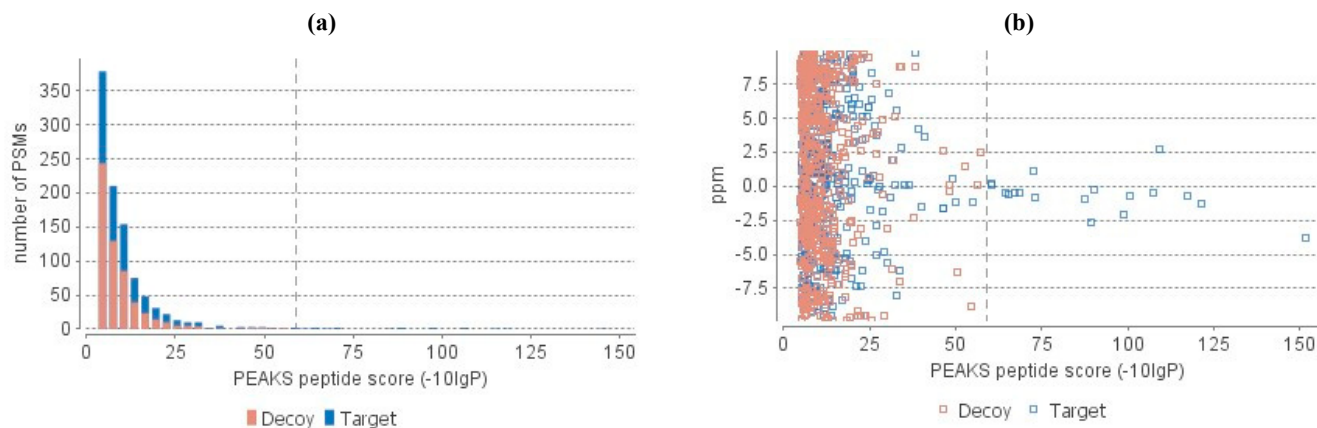

Table 1. Statistics of data.

|                | #Scans |       |          | #Features | Identified |        |             | #Peptides | #Sequences | #Proteins* |     |     |
|----------------|--------|-------|----------|-----------|------------|--------|-------------|-----------|------------|------------|-----|-----|
|                | MS1    | MS/MS | #Chimera |           | #PSMs      | #Scans | #Features** |           |            | Groups     | All | Top |
| Total          | 4297   | 4677  | 3        | 4128      | 18         | 18     | 13          | 16        | 16         | 1          | 1   | 1   |
| Gastric RAW 12 | 4297   | 4677  | 3        | 4128      | 18         | 18     | 13          | 16        | 16         | 1          | 1   | 1   |

\* proteins with significant peptides are used in counts.

\*\* features are identified by DB search only.

Figure 3. Sample overlap for Proteins and Peptides (up to 8 samples). (a) All Proteins; (b) Top Proteins; (c) Peptides; ?

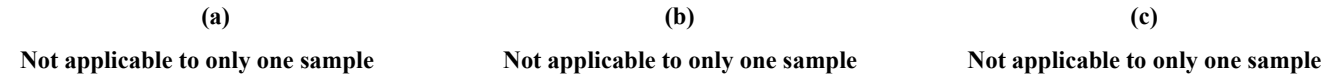

Figure 4. Distribution of peptide feature detection. (a) Feature m/z distribution; (b) Feature RT distribution.

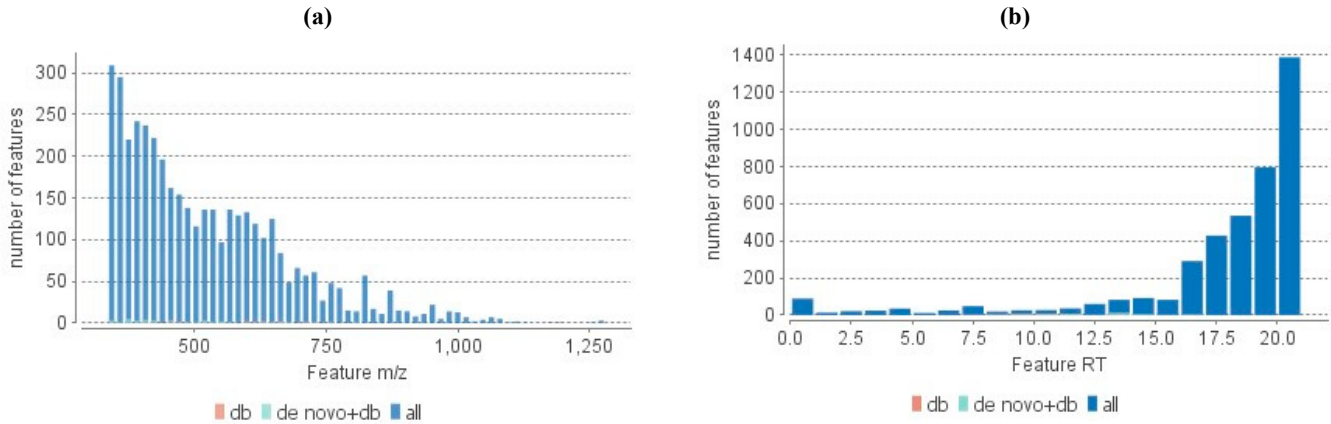

Figure 5. Distribution of identified peptide features. (a) Feature abundance distribution; (b) De novo sequencing validation. ?

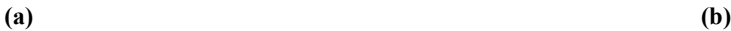

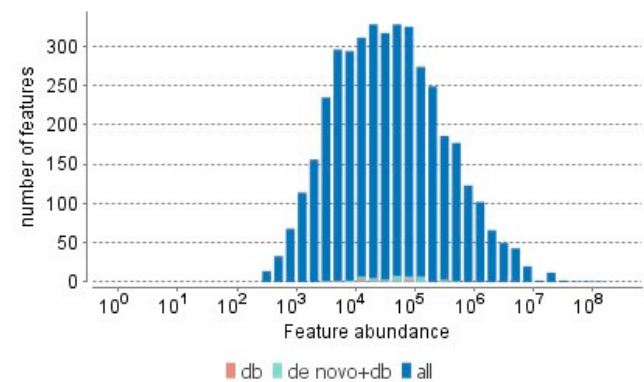

**Table 2.** Result filtration parameters.

|                          |       |
|--------------------------|-------|
| Peptide -10lgP           | ≥59.1 |
| PTM AScore               | ≥20   |
| Protein -10lgP           | ≥20   |
| Proteins unique peptides | ≥1    |
| De novo score(%)         | ≥50%  |

**Table 3.** Statistics of filtered result.

**Figure 6.** Precursor mass error of peptide-spectrum matches (PSM) in filtered result. (a) Distribution of precursor mass error in ppm; (b) Scatterplot of precursor m/z versus precursor mass error in ppm. ?

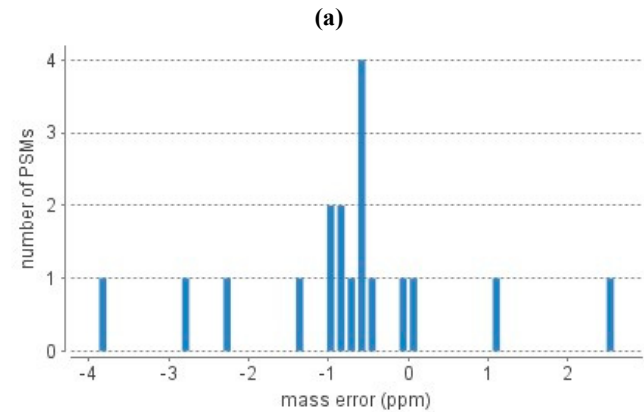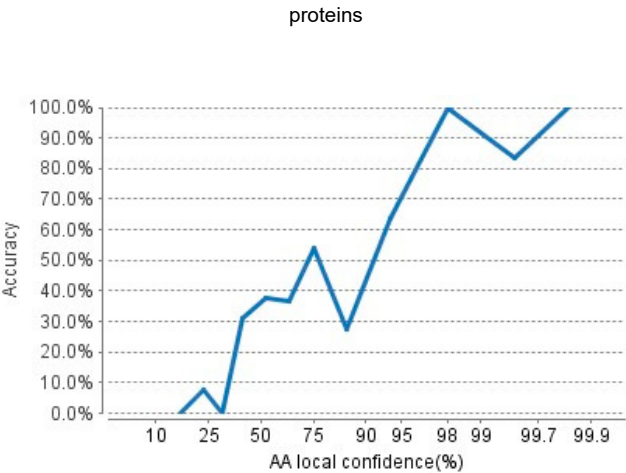

|                                |      |
|--------------------------------|------|
| FDR (Peptide-Spectrum Matches) | 0.0% |
| FDR (Peptide Sequences)        | 0.0% |
| FDR (Protein Group)            | 0.0% |
| De Novo Only Spectra           | 163  |

### 3. Experiment Control

**Table 4.** PTM profile.

| Name | ΔMass | Position | #PSM | -10lgP | Abundance | AScore |
|------|-------|----------|------|--------|-----------|--------|
|------|-------|----------|------|--------|-----------|--------|

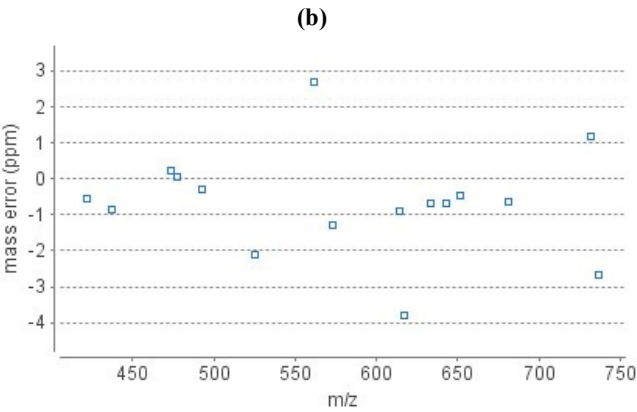



**Table 5.** Number of identified peptides in each sample by the number of missed cleavages.

Missed Cleavages 0 1 2 3 4+ Gastric RAW 12 13 3 0 0 0

## 4. Other Information

**Table 6.** Search parameters.

PEAKS Version: PEAKS Studio 10.6 build 20201015

Search Engine Name: PEAKS

Parent Mass Error Tolerance: 10.0 ppm

Fragment Mass Error Tolerance: 0.02 Da

Precursor Mass Search Type: monoisotopic

Enzyme: Trypsin

Max Missed Cleavages: 2

Digest Mode: Semispecific

Fixed Modifications:

Carbamidomethylation: 57.02

Variable Modifications:

Oxidation (M): 15.99

Deamidation (NQ): 0.98

Searched Entry: 602

FDR Estimation: Enabled

De novo score(%) threshold: 15

Peptide hit threshold (-10logP): 30.0

Peaks run ID: 133

Merge Options: no merge

Precursor Options: corrected

Charge Options: no correction

Filter m/z: 200.0 - 2000.0

Filter Charge: 2 - 8

Process: true

proteins

Acetylation (K): 42.01

Acetylation (Protein N-term): 42.01

Acetylation (N-term): 42.01

Amidation: -0.98

Beta-methylthiolation: 45.99

Biotinylation: 226.08 and 303

more...

Max Variable PTM Per Peptide: 3

Database: Corylus aveliana iz 2020 od 156 KB

Taxon: All

Contaminant Database: crap

**Table 7.** Instrument parameters.

Fractions: 12y.raw

Ion Source: ESI(nano-spray)

Fragmentation Mode: CID, CAD(y and b ions)

MS Scan Mode: FT-ICR/Orbitrap

MS/MS Scan Mode: FT-ICR/Orbitrap



Protein List

Protein Accession Contains:  
Protein Description Contains:  
Protein Sample Area >=  
Protein PTM Contains:

| Protein Group    | Protein ID | Accession            | -10lgP | Coverage (%) | Coverage (%) Gastric RAW 12 | Area Gastric RAW 12 | #Peptides | #Unique | #Spec Gastric RAW 12 | PTM | Avg. Mass | Description                                                                        |
|------------------|------------|----------------------|--------|--------------|-----------------------------|---------------------|-----------|---------|----------------------|-----|-----------|------------------------------------------------------------------------------------|
| 5                | 10069      | sp Q9ATH2 NLTP_CORAV | 102.93 | 21           | 21                          | 3.3107E4            | 2         | 2       | 2                    | Y   | 11806     | Non-specific lipid-transfer protein Cor a 8 OS=Corylus avellana OX=13451 PE=1 SV=1 |
| total 1 proteins |            |                      |        |              |                             |                     |           |         |                      |     |           |                                                                                    |

sp|Q9ATH2|NLTP\_CORAV [back to list](#)

| [Protein Coverage](#) | [Supporting Peptides](#) |

Protein Coverage:

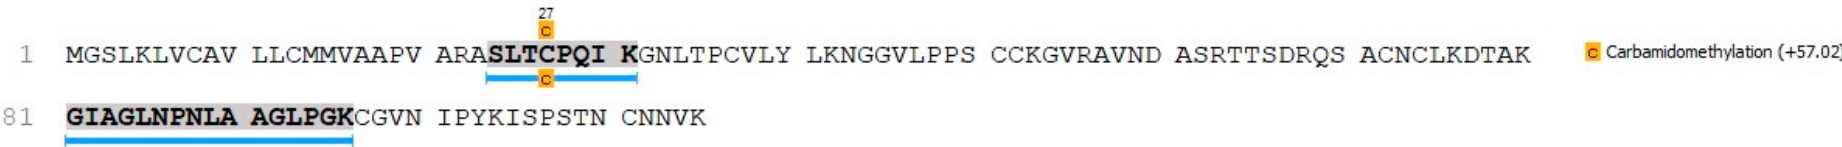

Supporting Peptides:

| Peptide               | Uniq | -10lgP | Mass      | Length | ppm | m/z      | z | RT    | Fraction | Scan | Source File | Area Gastric RAW 12 | #Feature | #Feature Gastric RAW 12 | Start | End | PTM                  | AScore                          | Found By |
|-----------------------|------|--------|-----------|--------|-----|----------|---|-------|----------|------|-------------|---------------------|----------|-------------------------|-------|-----|----------------------|---------------------------------|----------|
| K.GIAGLNP NLAAGLPGK.C | Y    | 72.81  | 1461.8303 | 16     | 1.2 | 731.9233 | 2 | 11.88 | 9        | 4687 | 12y.raw     | 2.1786E4            | 1        | 1                       | 81    | 96  |                      |                                 | PEAKS DB |
| A.SLTC(+57.02)PQIK.G  | Y    | 60.23  | 945.4954  | 8      | 0.2 | 473.7551 | 2 | 9.36  | 9        | 3708 | 12y.raw     | 1.1321E4            | 1        | 1                       | 24    | 31  | Carbamidomethylation | C4:Carbamidomethylation:1000.00 | PEAKS DB |
| total 2 peptides      |      |        |           |        |     |          |   |       |          |      |             |                     |          |                         |       |     |                      |                                 |          |

Peptide List

Summary

1. Notes

cor a 9 and cor a 8

Spot 13 from RAW control hazelnut

2. Result Statistics

Figure 1. False discovery rate (FDR) curve. X axis is the number of peptides being kept. Y axis is the corresponding FDR.

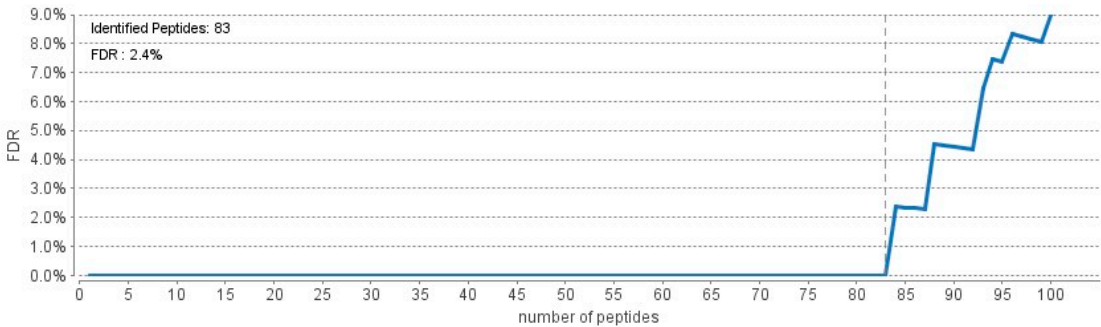

Figure 2. PSM score distribution. (a) Distribution of PEAKS peptide score; (b) Scatterplot of PEAKS peptide score versus precursor mass error.

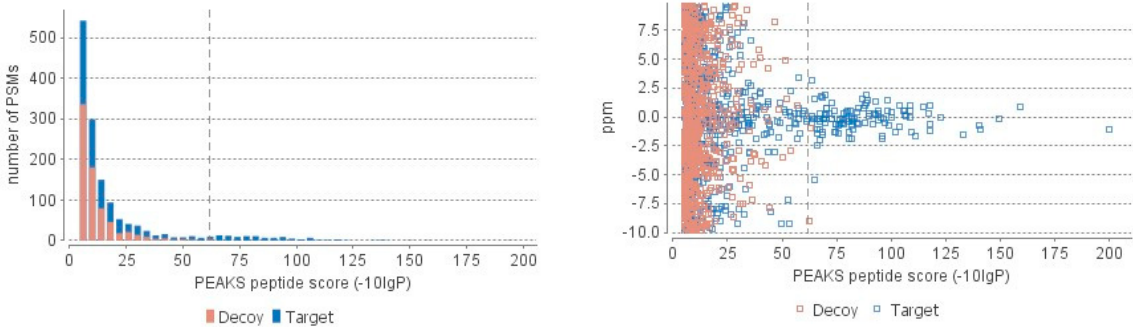

Table 1. Statistics of data.

|                | #Scans |       |          | #Features | Identified |        |             | #Peptides | #Sequences | #Proteins* |     |     |
|----------------|--------|-------|----------|-----------|------------|--------|-------------|-----------|------------|------------|-----|-----|
|                | MS1    | MS/MS | #Chimera |           | #PSMs      | #Scans | #Features** |           |            | Groups     | All | Top |
| Total          | 3998   | 4962  | 22       | 3832      | 114        | 114    | 68          | 83        | 74         | 2          | 3   | 2   |
| Control RAW 13 | 3998   | 4962  | 22       | 3832      | 114        | 114    | 68          | 83        | 74         | 2          | 3   | 2   |

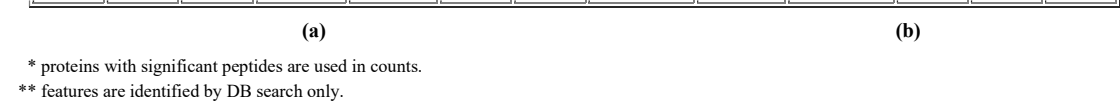

Figure 3. Sample overlap for Proteins and Peptides (up to 8 samples). (a) All Proteins; (b) Top Proteins; (c) Peptides; ?

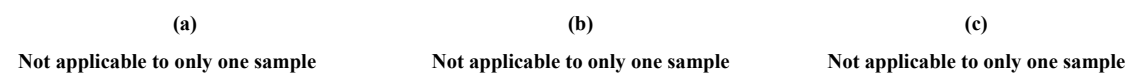

Figure 4. Distribution of peptide feature detection. (a) Feature m/z distribution; (b) Feature RT distribution.

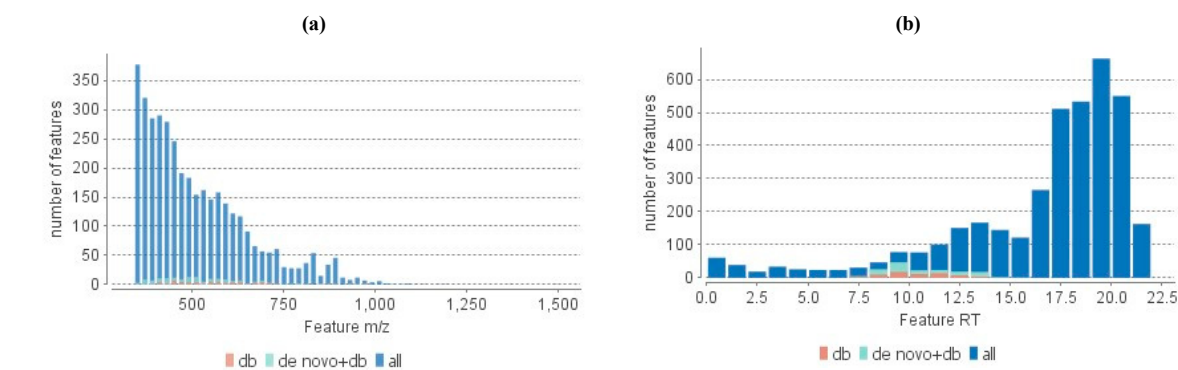

Figure 5. Distribution of identified peptide features. (a) Feature abundance distribution; (b) *De novo* sequencing validation. ?

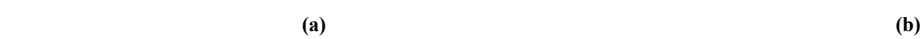

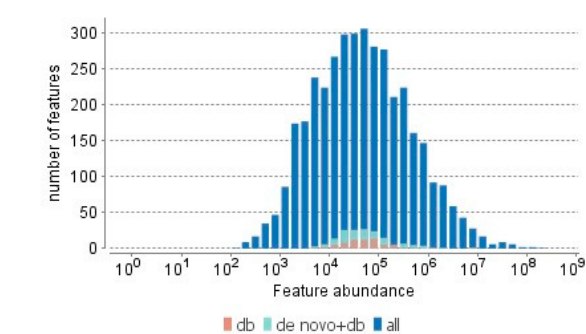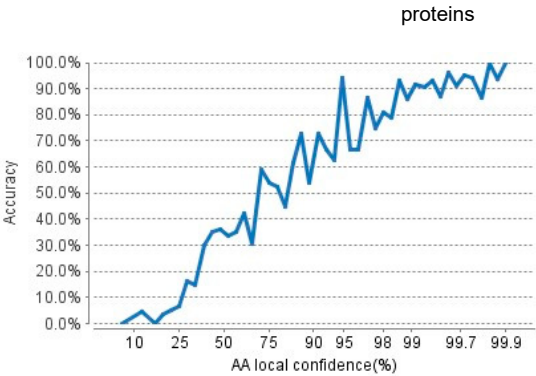

**Table 2.** Result filtration parameters.

|                          |       |
|--------------------------|-------|
| Peptide -10lgP           | ≥61.7 |
| PTM Ascore               | ≥20   |
| Protein -10lgP           | ≥20   |
| Proteins unique peptides | ≥1    |
| De novo score(%)         | ≥50%  |

**Table 3.** Statistics of filtered result.

|                                |      |
|--------------------------------|------|
| FDR (Peptide-Spectrum Matches) | 1.8% |
| FDR (Peptide Sequences)        | 2.4% |

**Table 4.** PTM profile.

| Name            | ΔMass     | Position |
|-----------------|-----------|----------|
|                 | #PSM      | -10lgP   |
|                 | Abundance | AScore   |
| Carbamidomethyl | 57.02     | C        |
|                 | 15        | 117.48   |
|                 | 1.28E6    | 1000.00  |

FDR (Protein Group) 0.0%  
De Novo Only Spectra 232

3. Experiment Control

Figure 6. Precursor mass error of peptide-spectrum matches (PSM) in filtered result. (a) Distribution of precursor mass error in ppm; (b) Scatterplot of precursor m/z versus precursor mass error in ppm.

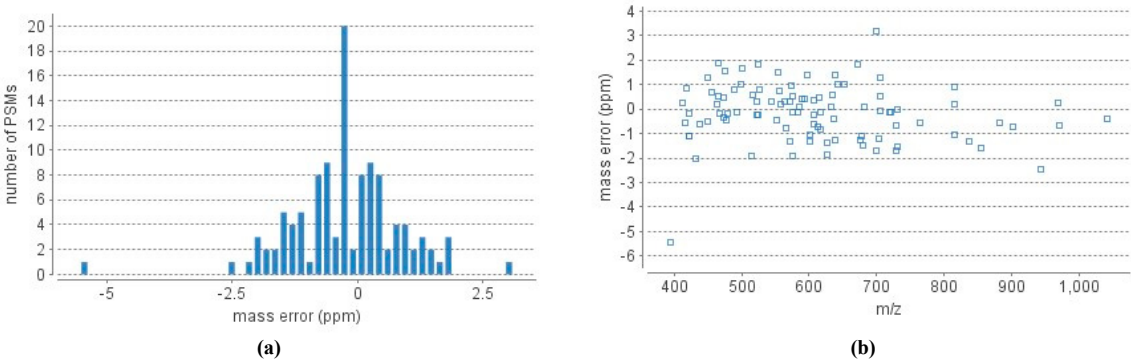

Table 5. Number of identified peptides in each sample by the number of missed cleavages.

|                  |       |        |         |                           |    |         |                             |
|------------------|-------|--------|---------|---------------------------|----|---------|-----------------------------|
| Oxidation        | 15.99 | M      | 5       | Digest Mode: Semispecific |    |         |                             |
|                  | 89.59 | 5.47E4 | 1000.00 | Fixed Modifications:      |    |         |                             |
| Missed Cleavages | 0     | 1      | 2       | 3                         | 4+ | Control | Carbamidomethylation: 57.02 |
| RAW              | 13    | 60     | 23      | 0                         | 0  | 0       | Variable Modifications:     |

4. Other Information

Table 6. Search parameters.

PEAKS Version: PEAKS Studio 10.6  
build 20201015  
Search Engine Name: PEAKS  
Parent Mass Error Tolerance: 10.0 ppm  
Fragment Mass Error Tolerance: 0.02  
Da  
Precursor Mass Search Type:  
monoisotopic  
Enzyme: Trypsin  
Max Missed Cleavages: 2  
Database: Corylus aveliana iz 2020 od 156 KB  
Taxon: All  
Contaminant Database: crap

Beta-methylthiolation: 45.99 Biotinylation:  
226.08 and 303 more...  
Max Variable PTM Per Peptide: 3

Table 7. Instrument parameters.

Fractions: 13x.raw  
Ion Source: ESI(nano-spray)  
Fragmentation Mode: CID, CAD(y and b ions)  
MS Scan Mode: FT-ICR/Orbitrap  
MS/MS Scan Mode: FT-ICR/Orbitrap

proteins

Searched Entry: 602  
FDR Estimation: Enabled  
De novo score(%) threshold: 15  
Peptide hit threshold (-10logP): 30.0  
Peaks run ID: 94  
Merge Options: no merge  
Precursor Options: corrected  
Charge Options: no correction  
Filter m/z: 200.0 - 2000.0  
Filter Charge: 2 - 8  
Process: true  
Associate chimera: yes

## Protein List

Protein Accession Contains:  
Protein Description Contains:  
Protein Sample Area >=  
Protein PTM Contains:

[illegible]

A0A0A0P7E3 | A0A0A0P7E3\_CORAV

[back to list](#)

**Protein Coverage | Supporting Peptides |**

1 MAKLILVSFS LCLLVLFNGC LGIDVGLRRQ QQRHFGECLN DRLNALEPTN RIEAEAGQIE SWDHNDQQFQ CAGVAVIRRT  
81 IEPNGLLLPQ YSNAPELIYI ERGRGITGVL FPGCPETFED PQQQSQQGGQ QGQSQRSEQD RHQKIRYFQE GDIIALPAGV  
161 AHWCYNDGDS PVVAVSLTHT NNYANQLDEN PRHFYLAGNP DDEHQRRQQQ QFGQRRRQQQ HSRGKEGEQE QQGEGNNVFS  
241 GFDAEF **LADA FNVDVDTARR** LQSNQDKRRN IVKVEGRLQM VRPERSRQEW ERQERQERES EQERERQRRQ GGRGRDVG **GF**  
321 **EETICSLRLM ENIGRSRAD IYTEQVGRIN TVNSNTLPVL** RWLQLSAERG DLQREGLYVP HWNLNAHSVY YAIRGRARVQ  
401 VVDDNGNTVF DDELRRQGQVL **TIPQNFVAVK** **RAESEGFQEW** **AFKTDNAQI** **SPLAGRTSAI** **RALPDDVLAN** **AFQISREEAR**  
481 RLK **YNRQETT** **LAR**SSRSSE RMRRRSESEG RAEA

- A Amidation of lysines or N-terminal amines with methyl acetimidate (+41.03)
- C Carbamidomethylation (+57.02)
- C Carbamidomethylation (DHKE, X@N-term) (+57.02)
- D Dimethylation(KR) (+28.03)
- O Oxidation (M) (+15.99)
- P 2-OH-ethyl thio-Ser (+60.00)

**Protein Coverage:**  
**Supporting Peptides:**

| Peptide                        | Uniq | -10lgP | Mass      | Length | ppm  | m/z      | z | RT    | Fraction | Scan | Source File | Area Control RAW 13 | #Feature | #Feature Control RAW 13 | Start | End | PTM                                                                                       | AScore                                                                                                         | Found By  |
|--------------------------------|------|--------|-----------|--------|------|----------|---|-------|----------|------|-------------|---------------------|----------|-------------------------|-------|-----|-------------------------------------------------------------------------------------------|----------------------------------------------------------------------------------------------------------------|-----------|
| R.ALDDVLNAFQISR.E              | Y    | 200.00 | 1628.8522 | 15     | -1.1 | 815.4325 | 2 | 13.40 | 12       | 5297 | 13x.raw     | 9.2226E4            | 1        | 1                       | 462   | 476 |                                                                                           |                                                                                                                | PEAKS DB  |
| K.TNDNAQISPLAGR.T              | Y    | 140.88 | 1355.6793 | 13     | -1.1 | 678.8462 | 2 | 9.86  | 12       | 3900 | 13x.raw     | 1.6633E4            | 1        | 1                       | 444   | 456 |                                                                                           |                                                                                                                | PEAKS DB  |
| F.LADAFNVDDVTAR.R              | Y    | 117.88 | 1405.6837 | 13     | -1.2 | 703.8483 | 2 | 11.40 | 12       | 4498 | 13x.raw     | 3.899E4             | 1        | 1                       | 247   | 259 |                                                                                           |                                                                                                                | PEAKS DB  |
| N.GFEETIC(+57.02)SLR.L         | Y    | 117.48 | 1210.5652 | 10     | -0.6 | 606.2895 | 2 | 11.47 | 12       | 4538 | 13x.raw     | 1.2754E6            | 1        | 1                       | 319   | 328 | Carbamidomethylation                                                                      | C7:Carbamidomethylation:1000.00                                                                                | PEAKS DB  |
| K.YNRQETTLAR.S                 | Y    | 114.64 | 1250.6367 | 10     | 0.8  | 417.8865 | 3 | 7.77  | 12       | 3052 | 13x.raw     | 3.198E4             | 1        | 1                       | 484   | 493 |                                                                                           |                                                                                                                | PEAKS DB  |
| R.AESEGFEWVAFK.T               | Y    | 110.83 | 1398.6455 | 12     | -1.7 | 700.3289 | 2 | 12.77 | 12       | 5048 | 13x.raw     | 1.4503E4            | 1        | 1                       | 432   | 443 |                                                                                           |                                                                                                                | PEAKS DB  |
| N.DNAQISPLAGR.T                | Y    | 109.40 | 1140.5887 | 11     | -1.3 | 571.3009 | 2 | 10.13 | 12       | 3997 | 13x.raw     | 3.6614E4            | 1        | 1                       | 446   | 456 |                                                                                           |                                                                                                                | PEAKS DB  |
| R.SRADIYTEQVGR.I               | Y    | 108.50 | 1393.6949 | 12     | 0.5  | 465.5725 | 3 | 8.99  | 12       | 3555 | 13x.raw     | 1.0572E5            | 1        | 1                       | 337   | 348 |                                                                                           |                                                                                                                | PEAKS DB  |
| R.INTVNSNTLPVLR.W              | Y    | 108.44 | 1439.8096 | 13     | -0.1 | 720.9120 | 2 | 11.25 | 12       | 4435 | 13x.raw     | 1.0379E5            | 1        | 1                       | 349   | 361 |                                                                                           |                                                                                                                | PEAKS DB  |
| R.ALDDVLNAFQISREAR.R           | Y    | 105.26 | 2114.0754 | 19     | 0.5  | 705.6995 | 3 | 12.86 | 12       | 5082 | 13x.raw     | 5.3095E4            | 1        | 1                       | 462   | 480 |                                                                                           |                                                                                                                | PEAKS DB  |
| R.TSAIRALPDDVLAN.A             | Y    | 98.56  | 1454.7728 | 14     | -0.7 | 728.3932 | 2 | 11.74 | 12       | 4639 | 13x.raw     | 6.2884E4            | 1        | 1                       | 457   | 470 |                                                                                           |                                                                                                                | PEAKS DB  |
| N.G(+57.02)FEETIC(+57.02)SLR.L | Y    | 98.41  | 1267.5867 | 10     | 0.6  | 634.8010 | 2 | 11.52 | 12       | 4552 | 13x.raw     | 8.2942E4            | 1        | 1                       | 319   | 328 | Carbamidomethylation (DHKE, X@N-term); Carbamidomethylation                               | G1:Carbamidomethylation (DHKE, X@N-term):39.76;C7:Carbamidomethylation:1000.00                                 | PEAKS PTM |
| N.SNTLPVLR.W                   | Y    | 96.85  | 898.5236  | 8      | -0.5 | 450.2689 | 2 | 10.47 | 12       | 4151 | 13x.raw     | 1.2044E5            | 1        | 1                       | 354   | 361 |                                                                                           |                                                                                                                | PEAKS DB  |
| R.ADIYTEQVGR.I                 | Y    | 95.94  | 1150.5618 | 10     | -1.9 | 576.2870 | 2 | 9.67  | 12       | 3814 | 13x.raw     | 3.9645E4            | 1        | 1                       | 339   | 348 |                                                                                           |                                                                                                                | PEAKS DB  |
| D.NAQISPLAGR.T                 | Y    | 82.14  | 1025.5618 | 10     | -1.9 | 513.7872 | 2 | 9.64  | 12       | 3799 | 13x.raw     | 3.8301E4            | 1        | 1                       | 447   | 456 |                                                                                           |                                                                                                                | PEAKS DB  |
| R.INTVN(+.98)SNTLPVLR.W        | Y    | 81.80  | 1440.7936 | 13     | -0.1 | 721.4040 | 2 | 11.53 | 12       | 4555 | 13x.raw     | 0                   | 0        | 0                       | 349   | 361 |                                                                                           | N5:Deamidation (NQ):14.04                                                                                      | PEAKS DB  |
| N.G(+41.03)FEETIC(+57.02)SLR.L | Y    | 80.55  | 1251.5918 | 10     | -1.9 | 626.8020 | 2 | 11.47 | 12       | 4525 | 13x.raw     | 4.8682E4            | 1        | 1                       | 319   | 328 | Amidination of lysines or N-terminal amines with methyl acetimidate; Carbamidomethylation | G1:Amidination of lysines or N-terminal amines with methyl acetimidate:1000.00;C7:Carbamidomethylation:1000.00 | PEAKS PTM |
| L.TIPQNFAVAK.R                 | Y    | 78.45  | 1087.6025 | 10     | 0.3  | 544.8087 | 2 | 10.23 | 12       | 4074 | 13x.raw     | 9.1846E4            | 1        | 1                       | 421   | 430 |                                                                                           |                                                                                                                | PEAKS DB  |
| R.TSAIRALPDDVLANA.F            | Y    | 78.24  | 1525.8099 | 15     | -0.6 | 763.9118 | 2 | 12.15 | 12       | 4800 | 13x.raw     | 0                   | 0        | 0                       | 457   | 471 |                                                                                           |                                                                                                                | PEAKS DB  |
| N.GFE(+14.02)ETIC(+57.02)SLR.L | Y    | 75.54  | 1224.5808 | 10     | -0.7 | 613.2972 | 2 | 11.85 | 12       | 4688 | 13x.raw     | 8.0941E4            | 1        | 1                       | 319   | 328 | Carbamidomethylation                                                                      | E3:Methylation(others):17.01;C7:Carbamidomethylation:1000.00                                                   | PEAKS PTM |
| R.TSAIRALPDDVLANAF.Q           | Y    | 73.95  | 1672.8784 | 16     | -1.3 | 837.4454 | 2 | 13.22 | 12       | 5226 | 13x.raw     | 0                   | 0        | 0                       | 457   | 472 |                                                                                           |                                                                                                                | PEAKS DB  |
| L.TIPQNFAVAK(+28.03).R         | Y    | 70.38  | 1115.6339 | 10     | 0.2  | 558.8243 | 2 | 10.61 | 12       | 4190 | 13x.raw     | 9.4634E4            | 1        | 1                       | 421   | 430 | Dimethylation(KR)                                                                         | K10:Dimethylation(KR):1000.00                                                                                  | PEAKS PTM |

|                                |   |       |           |    |      |          |   |       |    |      |         |          |   |   |     |     |                                          |                                                              |           |
|--------------------------------|---|-------|-----------|----|------|----------|---|-------|----|------|---------|----------|---|---|-----|-----|------------------------------------------|--------------------------------------------------------------|-----------|
| R.LM(+15.99)ENIGSR.S           | Y | 69.08 | 934.4542  | 8  | -0.2 | 468.2343 | 2 | 8.42  | 12 | 3303 | 13x.raw | 8.5016E4 | 1 | 1 | 329 | 336 | Oxidation (M)                            | M2:Oxidation (M):1000.00                                     | PEAKS DB  |
| R.TSAIRALPDDVLA.N              | Y | 67.76 | 1340.7300 | 13 | 1.8  | 671.3735 | 2 | 11.92 | 12 | 4707 | 13x.raw | 0        | 0 | 0 | 457 | 469 |                                          |                                                              | PEAKS DB  |
| C.SLRIM(+15.99)ENIGSR.S        | Y | 67.34 | 1290.6714 | 11 | -2.0 | 431.2302 | 3 | 9.37  | 12 | 3697 | 13x.raw | 1.7652E4 | 1 | 1 | 326 | 336 | Oxidation (M)                            | M5:Oxidation (M):1000.00                                     | PEAKS DB  |
| A.QISPLAGR.T                   | Y | 67.12 | 840.4817  | 8  | -1.1 | 421.2477 | 2 | 9.43  | 12 | 3719 | 13x.raw | 2.5825E4 | 1 | 1 | 449 | 456 |                                          |                                                              | PEAKS DB  |
| N.GFEETIC(+57.02)S(+60.00)LR.L | Y | 67.10 | 1270.5686 | 10 | -0.4 | 636.2913 | 2 | 11.93 | 12 | 4713 | 13x.raw | 0        | 0 | 0 | 319 | 328 | Carbamidomethylation; 2-OHethyl thio-Ser | C7:Carbamidomethylation:1000.00;S8:2-OH-ethyl thio-Ser:28.36 | PEAKS PTM |
| R.ALPPDVLANAFQISREE.A          | Y | 65.75 | 1886.9374 | 17 | -2.5 | 944.4736 | 2 | 13.58 | 12 | 5383 | 13x.raw | 2.1722E4 | 1 | 1 | 462 | 478 |                                          |                                                              | PEAKS DB  |
| total 28 peptides              |   |       |           |    |      |          |   |       |    |      |         |          |   |   |     |     |                                          |                                                              |           |

sp|Q9ATH2|NLTP\_CORAV

back to list

| [Protein Coverage](#) | [Supporting Peptides](#) | [Protein](#)

Coverage:

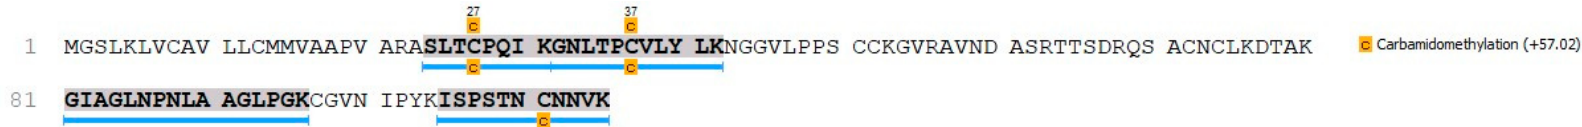

Supporting Peptides:

| Peptide                 | Uniq | -10lgP | Mass      | Length | ppm  | m/z      | z | RT    | Fraction | Scan | Source File | Area Control RAW 13 | #Feature | #Feature Control RAW 13 | Start | End | PTM                  | AScore                          | Found By |
|-------------------------|------|--------|-----------|--------|------|----------|---|-------|----------|------|-------------|---------------------|----------|-------------------------|-------|-----|----------------------|---------------------------------|----------|
| K.GIAGLNPILAAGLPGK.C    | Y    | 122.74 | 1461.8303 | 16     | 0.0  | 731.9224 | 2 | 11.89 | 12       | 4700 | 13x.raw     | 2.0148E5            | 1        | 1                       | 81    | 96  |                      |                                 | PEAKS DB |
| K.ISPSTNC(+57.02)NNVK   | Y    | 103.80 | 1232.5819 | 11     | -0.8 | 617.2977 | 2 | 7.80  | 12       | 3068 | 13x.raw     | 1.6753E4            | 1        | 1                       | 105   | 115 | Carbamidomethylation | C7:Carbamidomethylation:1000.00 | PEAKS DB |
| K.GNLTPC(+57.02)VLYLK.N | Y    | 101.73 | 1276.6849 | 11     | -1.3 | 639.3489 | 2 | 11.89 | 12       | 4701 | 13x.raw     | 6.2313E4            | 1        | 1                       | 32    | 42  | Carbamidomethylation | C6:Carbamidomethylation:1000.00 | PEAKS DB |
| A.SLTC(+57.02)PQIK.G    | Y    | 80.55  | 945.4954  | 8      | -0.3 | 473.7548 | 2 | 9.40  | 12       | 3703 | 13x.raw     | 6.5528E4            | 1        | 1                       | 24    | 31  | Carbamidomethylation | C4:Carbamidomethylation:1000.00 | PEAKS DB |
| total 4 peptides        |      |        |           |        |      |          |   |       |          |      |             |                     |          |                         |       |     |                      |                                 |          |

Peptide List



**Summary**

Spot 14 from RAW control hazelnut

**1. Notes**

Only Cor a 9

**2. Result Statistics****Figure 1.** False discovery rate (FDR) curve. X axis is the number of peptides being kept. Y axis is the corresponding FDR. ?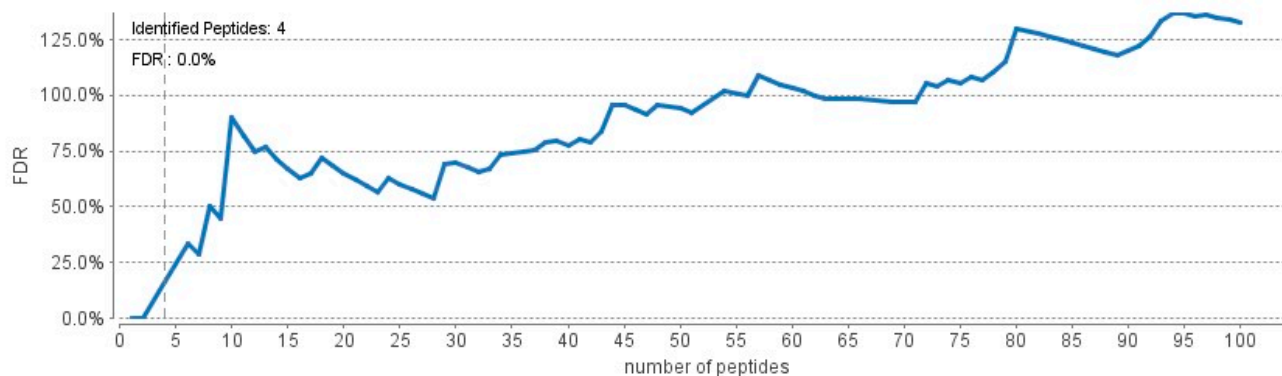**Figure 2.** PSM score distribution. (a) Distribution of PEAKS peptide score; (b) Scatterplot of PEAKS peptide score versus precursor mass error. ?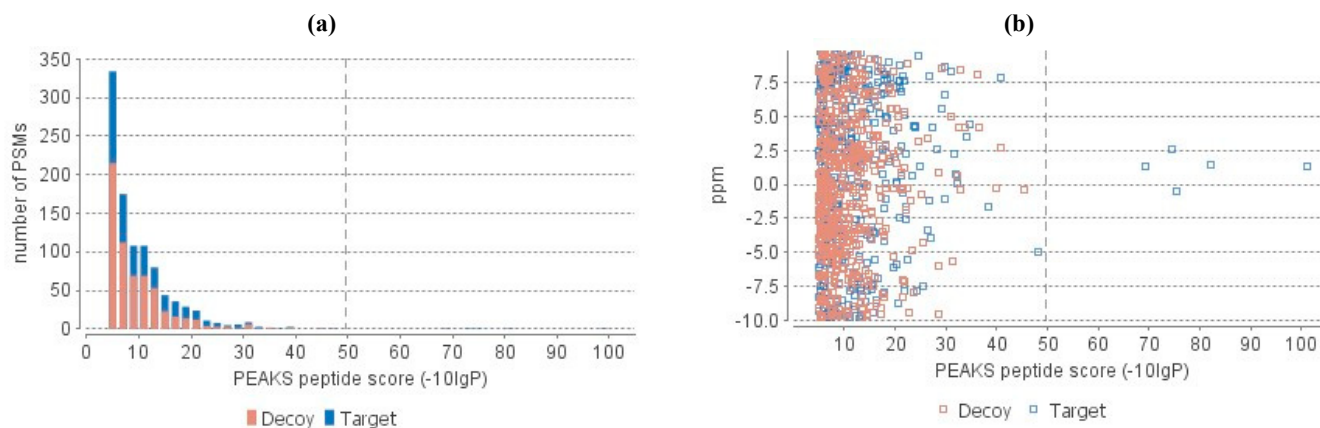

Table 1. Statistics of data.

|                      | #Scans |       |          | #Features | Identified |        |             | #Peptides | #Sequences | #Proteins* |     |     |
|----------------------|--------|-------|----------|-----------|------------|--------|-------------|-----------|------------|------------|-----|-----|
|                      | MS1    | MS/MS | #Chimera |           | #PSMs      | #Scans | #Features** |           |            | Groups     | All | Top |
| Total                | 4348   | 4596  | 12       | 2187      | 5          | 5      | 1           | 4         | 4          | 1          | 2   | 2   |
| Control<br>RAW<br>14 | 4348   | 4596  | 12       | 2187      | 5          | 5      | 1           | 4         | 4          | 1          | 2   | 2   |

\* proteins with significant peptides are used in counts.

\*\* features are identified by DB search only.

Figure 3. Sample overlap for Proteins and Peptides (up to 8 samples). (a) All Proteins; (b) Top Proteins; (c) Peptides; ?



Figure 4. Distribution of peptide feature detection. (a) Feature m/z distribution; (b) Feature RT distribution.

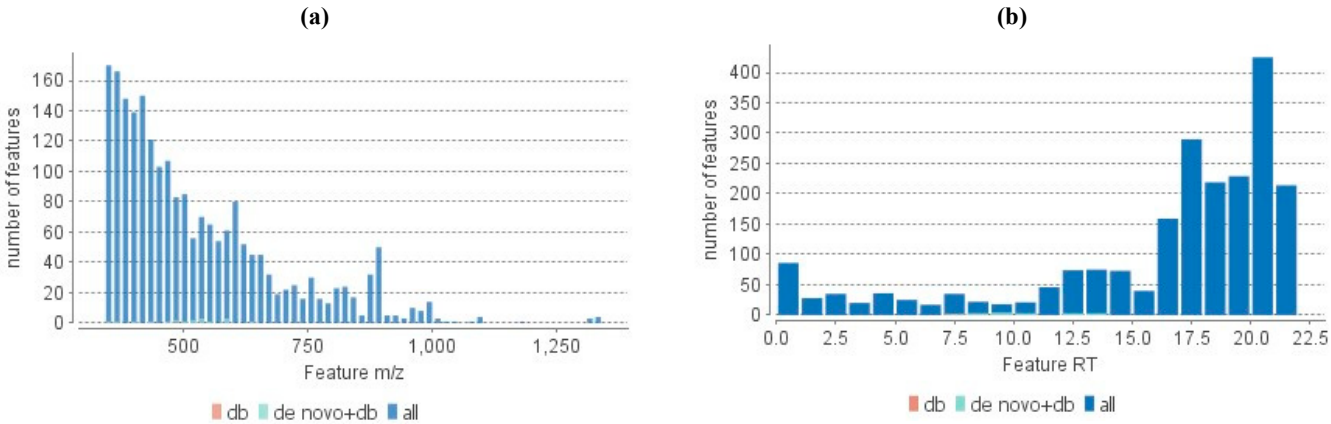

Figure 5. Distribution of identified peptide features. (a) Feature abundance distribution; (b) De novo sequencing validation. ?

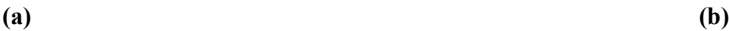

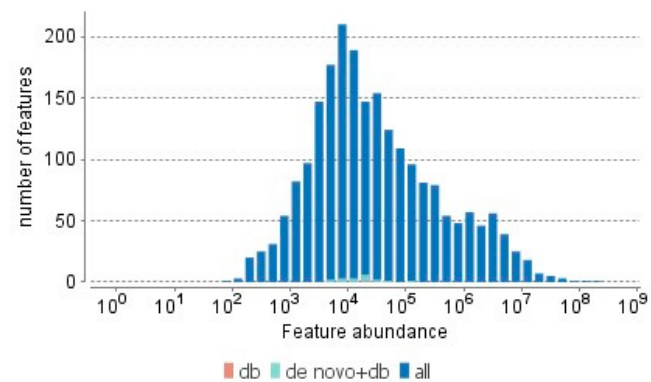

**Table 2.** Result filtration parameters.

|                          |       |
|--------------------------|-------|
| Peptide -10lgP           | ≥49.6 |
| PTM Ascore               | ≥20   |
| Protein -10lgP           | ≥20   |
| Proteins unique peptides | ≥1    |
| De novo score(%)         | ≥50%  |

**Table 3.** Statistics of filtered result.

**Figure 6.** Precursor mass error of peptide-spectrum matches (PSM) in filtered result. (a) Distribution of precursor mass error in ppm; (b) Scatterplot of precursor m/z versus precursor mass error in ppm. ?

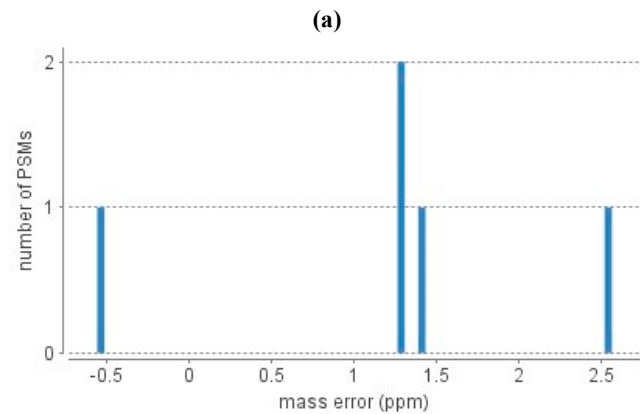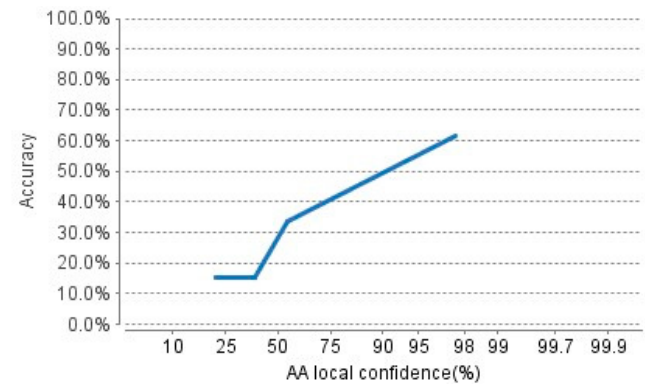

|                                |      |
|--------------------------------|------|
| FDR (Peptide-Spectrum Matches) | 0.0% |
| FDR (Peptide Sequences)        | 0.0% |
| FDR (Protein Group)            | 0.0% |
| De Novo Only Spectra           | 130  |

### 3. Experiment Control

**Table 4.** PTM profile.

| Name | ΔMass | Position | #PSM | -10lgP | Abundance | AScore |
|------|-------|----------|------|--------|-----------|--------|
|------|-------|----------|------|--------|-----------|--------|

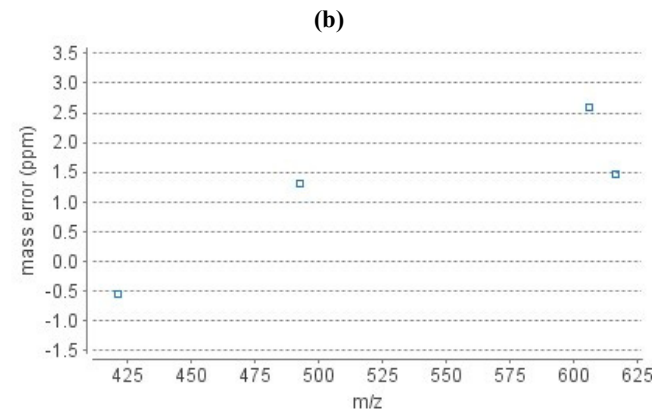

**Table 5.** Number of identified peptides in each sample by the number of missed cleavages.

| Missed Cleavages | 0 | 1 | 2 | 3 | 4+ | Control RAW | 14 | 3 | 1 |
|------------------|---|---|---|---|----|-------------|----|---|---|
|                  |   |   | 0 | 0 | 0  |             |    |   |   |

## 4. Other Information

**Table 6.** Search parameters.

PEAKS Version: PEAKS Studio 10.6 build 20201015

Search Engine Name: PEAKS

Parent Mass Error Tolerance: 10.0 ppm

Fragment Mass Error Tolerance: 0.02 Da

Precursor Mass Search Type: monoisotopic

Enzyme: Trypsin

Max Missed Cleavages: 2

Digest Mode: Semispecific

Fixed Modifications:

Carbamidomethylation: 57.02

Variable Modifications: Oxidation (M): 15.99

Deamidation (NQ): 0.98

Searched Entry: 602

FDR Estimation: Enabled

De novo score(%) threshold: 15

Peptide hit threshold (-10logP): 30.0

Peaks run ID: 103

Merge Options: no merge

Precursor Options: corrected

Charge Options: no correction

Filter m/z: 200.0 - 2000.0

Filter Charge: 2 - 8

Process: true

### proteins

Acetylation (K): 42.01

Acetylation (Protein N-term): 42.01

Acetylation (N-term): 42.01

Amidation: -0.98

Beta-methylthiolation: 45.99

Biotinylation: 226.08 and 303

more...

Max Variable PTM Per Peptide: 3

Database: Corylus aveliana iz 2020 od 156 KB

Taxon: All

Contaminant Database: crap

**Table 7.** Instrument parameters.

Fractions: 14x.raw

Ion Source: ESI(nano-spray)

Fragmentation Mode: CID, CAD(y and b ions)

MS Scan Mode: FT-ICR/Orbitrap

MS/MS Scan Mode: FT-ICR/Orbitrap

12/1/21, 1:26 PM

Associate chimera: yes

proteins

### Protein List

Protein Accession Contains:

Protein Description Contains:

| Peptide | Uniq | -10lgP | Mass | Length | ppm | m/z | z | RT | Fraction | Scan | Source File | Area Control RAW 14 | #Feature | #Feature Control RAW 14 | Start | End | PTM | AScore | Found By |
|---------|------|--------|------|--------|-----|-----|---|----|----------|------|-------------|---------------------|----------|-------------------------|-------|-----|-----|--------|----------|
|---------|------|--------|------|--------|-----|-----|---|----|----------|------|-------------|---------------------|----------|-------------------------|-------|-----|-----|--------|----------|

| total 1 peptides       |            |                             |        |              |                             |                     |           |         |                      |     |           |                                                                  |
|------------------------|------------|-----------------------------|--------|--------------|-----------------------------|---------------------|-----------|---------|----------------------|-----|-----------|------------------------------------------------------------------|
| Protein Sample Area >= |            |                             |        |              |                             |                     |           |         |                      |     |           |                                                                  |
| Protein PTM Contains:  |            |                             |        |              |                             |                     |           |         |                      |     |           |                                                                  |
| Protein Group          | Protein ID | Accession                   | -10lgP | Coverage (%) | Coverage (%) Control RAW 14 | Area Control RAW 14 | #Peptides | #Unique | #Spec Control RAW 14 | PTM | Avg. Mass | Description                                                      |
| 2                      | 10065      | A0A0A0P7E3 A0A0A0P7E3_CORAV | 74.37  | 2            | 2                           | 0                   | 1         | 1       | 1                    | Y   | 58837     | Cor a 9 allergen OS=Corylus avellana OX=13451 PE=2 SV=1          |
| 2                      | 10066      | Q8W1C2 Q8W1C2_CORAV         | 74.37  | 2            | 2                           | 0                   | 1         | 1       | 1                    | Y   | 59127     | 11S globulin-like protein OS=Corylus avellana OX=13451 PE=2 SV=1 |
| total 2 proteins       |            |                             |        |              |                             |                     |           |         |                      |     |           |                                                                  |

A0A0A0P7E3|A0A0A0P7E3\_CORAV

back to list

| [Protein Coverage](#) | [Supporting Peptides](#) |

Protein Coverage:

1   MAKLILVSFS LCLLVLFNGC LGIDVGLRRQ QQRHFGE CNL DRLNALEPTN RIEAEAGQIE SWDHNDQQFQ CAGVAVIRRT

81   IEPNGLLLPQ YSNAPELIYI ERGRGITGVL FPGCPETFED PQQQSQQGQG QGQSQRSEQD RHQKIRYFQE GDIIALPAGV

161   AHWCYNDGDS PVVAVSLLHT NNYANQLDEN PRHFYLAGNP DDEHQRRGQQ QFGQRRRQQQ HSRGKEGEQE QQGEGNNVFS

241   GFDAEFLADA FNVDVDTARR LQSNQDKRRN IVKVEGRLQM VRPERSRQEW ERQERQERES EQERERQRRQ GGRGRDVNGF

321   EETICSLRLM ENIGSRSRAD IYTEQVGRIN TVNSNTLPVL RWLQLSAERG DLQREGLYVP HWNLNAHSVV YAIRGRARVQ

401   VVDDNGNTVF DDELRRGQVL TIPQNFPAVAK RAESEGFQEW AFKTNDNAQI SPLAGRTSAI RALPDDVLAN AFQISREEAR

481   RLKYNRQETT LARSSRSSE RMRRRSESEG RAEA

Carbamidomethylation (+57.02)

Supporting Peptides:

| Peptide                | Uniq | -10lgP | Mass      | Length | ppm | m/z      | z | RT    | Fraction | Scan | Source File | Area Control RAW 14 | #Feature | #Feature Control RAW 14 | Start | End | PTM                  | AScore                          | Found By |
|------------------------|------|--------|-----------|--------|-----|----------|---|-------|----------|------|-------------|---------------------|----------|-------------------------|-------|-----|----------------------|---------------------------------|----------|
| N.GFEETIC(+57.02)SLR.L | Y    | 74.37  | 1210.5652 | 10     | 2.6 | 606.2914 | 2 | 11.48 | 15       | 4525 | 14x.raw     | 0                   | 0        | 0                       | 319   | 328 | Carbamidomethylation | C7:Carbamidomethylation:1000.00 | PEAKS DB |
| total 1 peptides       |      |        |           |        |     |          |   |       |          |      |             |                     |          |                         |       |     |                      |                                 |          |

Q8W1C2|Q8W1C2\_CORAV

back to list

| [Protein Coverage](#) | [Supporting Peptides](#) |

Protein Coverage:

 Carbamidomethylation (+57.02)

1 MAKLILVSFS LCLLVLFNGC LGINVGLRRQ QQRYFGECNL DRLNALEPTN RIEAEACQIE SWDHNDQQFQ CAGVAVIRRT  
81 IEPNGLLLPQ YSNAPELIYI ERGRGITGVL FPGCPETFED PQQQSQQGQR QGQGSQRSE QDRHQKIRHF REGDIIALPA  
161 GVAHWCYNDG DSPVVTVSL LHTNNYANQLD ENPRHFYLAG NPDDEHQRRQ QQQFGQRRRQ QQHSHGEQGE QEQQGEGNNV  
241 FSGFDAEFLA DAFNVDVDTA RRLQSNQDKR RNIVKVEGRL QVVRPERSRQ EWERQERQER ESEQERERQR RQGGRGRDVN  
321 **GFEETICSLR** LRENICTRSR ADIYTEQVGR INTVNSNTLP VLRWLQLSAE RGD LQREGLY VPHWNLNAHS VVYAIRGRAR  
401 VQVVDDNGNT VFDDEL RQGQ VLTIPQNF AV AKRAESEGF E WVAFKTNDNA QISPLAGRTS AIRALPDDVL ANAFQISREE  
481 ARRLKYNRQE TTLVRSSRSS SERKRRSESE GRAEA

Supporting Peptides:

| Peptide                | Uniq | -10lgP | Mass      | Length | ppm | m/z      | z | RT    | Fraction | Scan | Source File | Area Control RAW 14 | #Feature | #Feature Control RAW 14 | Start | End | PTM                  | AScore                          | Found By |
|------------------------|------|--------|-----------|--------|-----|----------|---|-------|----------|------|-------------|---------------------|----------|-------------------------|-------|-----|----------------------|---------------------------------|----------|
| N.GFEETIC(+57.02)SLR.L | Y    | 74.37  | 1210.5652 | 10     | 2.6 | 606.2914 | 2 | 11.48 | 15       | 4525 | 14x.raw     | 0                   | 0        | 0                       | 321   | 330 | Carbamidomethylation | C7:Carbamidomethylation:1000.00 | PEAKS DB |
| total 1 peptides       |      |        |           |        |     |          |   |       |          |      |             |                     |          |                         |       |     |                      |                                 |          |

Peptide List



Summary

Spot 15 from RAW control hazelnut

1. Notes

Cor a 9, Cor a 8 & 2s albumins

2. Result Statistics

Figure 1. False discovery rate (FDR) curve. X axis is the number of peptides being kept. Y axis is the corresponding FDR.

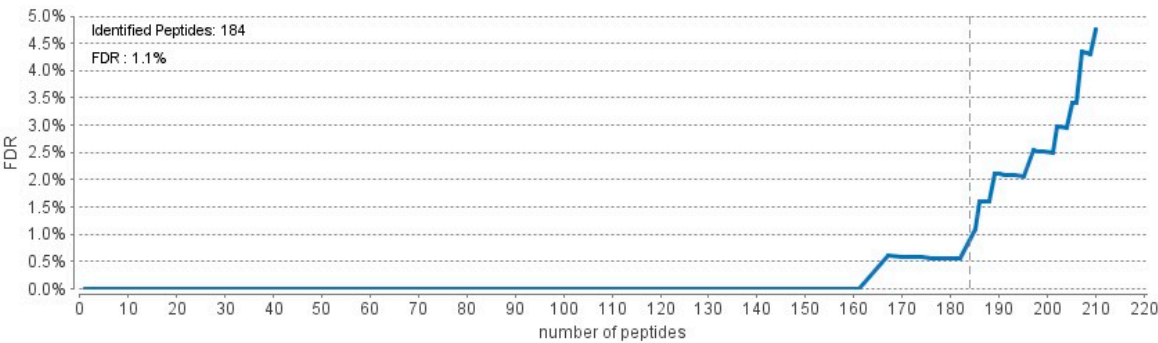

Figure 2. PSM score distribution. (a) Distribution of PEAKS peptide score; (b) Scatterplot of PEAKS peptide score versus precursor mass error.

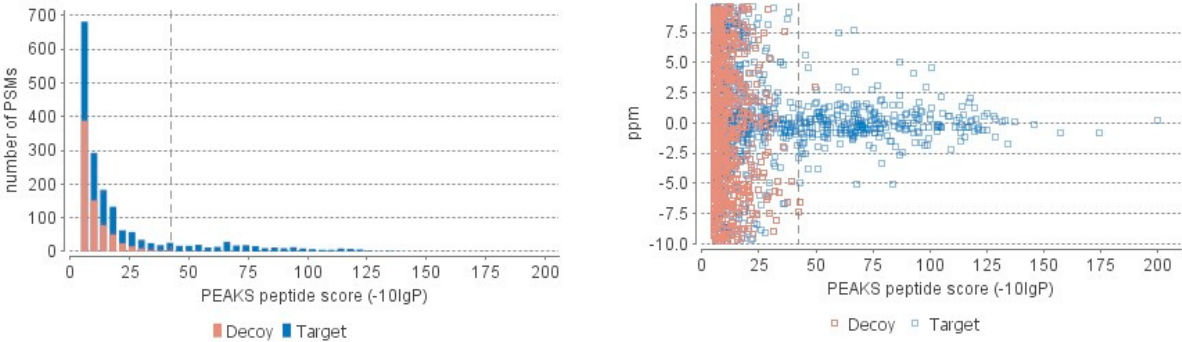

Table 1. Statistics of data.

|       | #Scans |       |          | #Features | Identified |        |             | #Peptides | #Sequences | #Proteins* |     |     |
|-------|--------|-------|----------|-----------|------------|--------|-------------|-----------|------------|------------|-----|-----|
|       | MS1    | MS/MS | #Chimera |           | #PSMs      | #Scans | #Features** |           |            | Groups     | All | Top |
| Total | 3354   | 5637  | 27       | 4287      | 283        | 282    | 147         | 184       | 147        | 5          | 11  | 11  |

|         |      |      |    |      |     |     |     |     |     | proteins |    |    |
|---------|------|------|----|------|-----|-----|-----|-----|-----|----------|----|----|
| (a)     |      |      |    |      |     |     |     |     |     | (b)      |    |    |
| Control | 3354 | 5637 | 27 | 4287 | 283 | 282 | 147 | 184 | 147 | 5        | 11 | 11 |
| RAW     |      |      |    |      |     |     |     |     |     |          |    |    |
| 15      |      |      |    |      |     |     |     |     |     |          |    |    |

\* proteins with significant peptides are used in counts.  
\*\* features are identified by DB search only.

Figure 3. Sample overlap for Proteins and Peptides (up to 8 samples). (a) All Proteins; (b) Top Proteins; (c) Peptides; ?

(a)

(b)

(c)

Not applicable to only one sample

Not applicable to only one sample

Not applicable to only one sample

Figure 4. Distribution of peptide feature detection. (a) Feature m/z distribution; (b) Feature RT distribution.

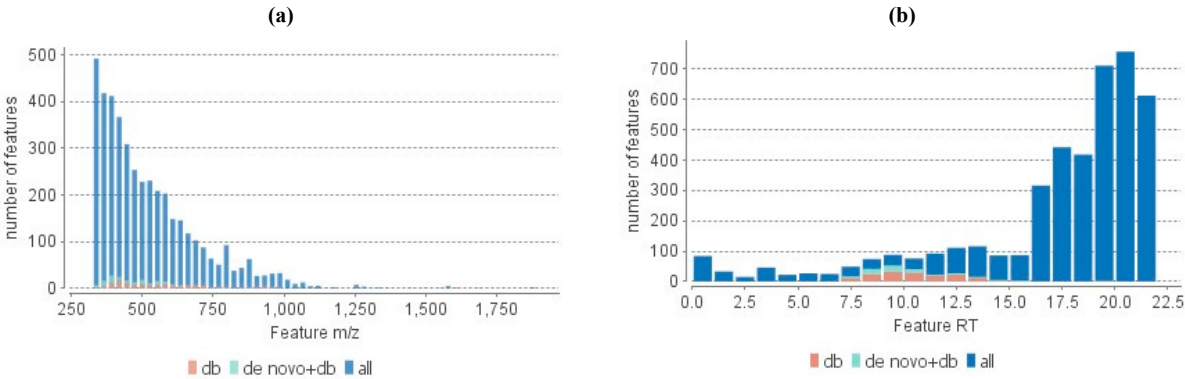

Figure 5. Distribution of identified peptide features. (a) Feature abundance distribution; (b) De novo sequencing validation. ?

(a)

(b)

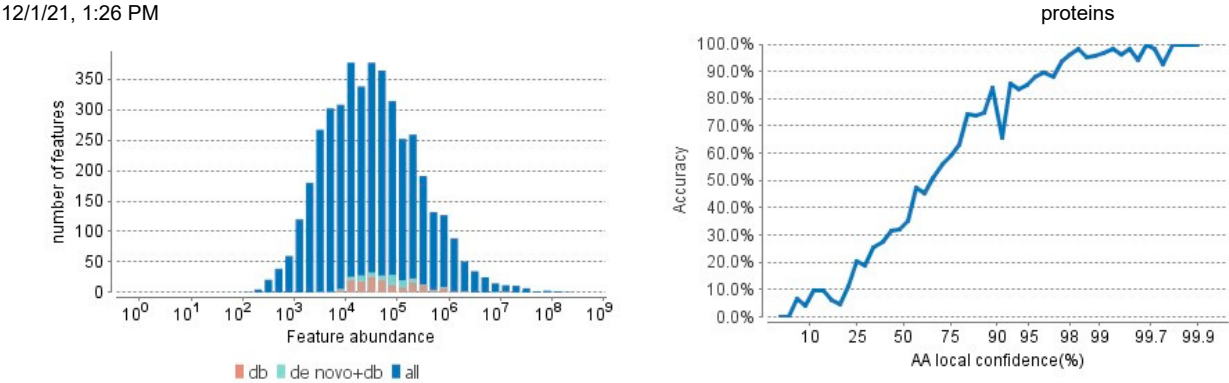

**Table 2.** Result filtration parameters.

|                |       |
|----------------|-------|
| Peptide -10lgP | ≥42.6 |
| PTM Ascore     | ≥20   |
| Protein -10lgP | ≥20   |

De novo score(%) ≥50%

**Table 3.** Statistics of filtered result.

|                                |       |
|--------------------------------|-------|
| FDR (Peptide-Spectrum Matches) | 0.7%  |
| FDR (Peptide Sequences)        | 1.1%  |
| FDR (Protein Group)            | 20.0% |
| De Novo Only Spectra           | 175   |

### 3. Experiment Control

**Figure 6.** Precursor mass error of peptide-spectrum matches (PSM) in filtered result. **(a)** Distribution of precursor mass error in ppm; **(b)** Scatterplot of precursor m/z versus precursor mass error in ppm. ?

(a)

(b)

| Proteins unique peptides |       | ≥1 Table 4. PTM profile. |      |        |           |         |
|--------------------------|-------|--------------------------|------|--------|-----------|---------|
| Name                     | ΔMass | Position                 | #PSM | -10lgP | Abundance | AScore  |
| Deamidation              | .98   | NQ                       | 24   | 121.31 | 9.45E4    | 13.67   |
| Oxidation                | 15.99 | M                        | 14   | 145.91 | 5.34E4    | 93.17   |
| Carbamidomethyl          | 57.02 | C                        | 12   | 112.99 | 2.4E5     | 1000.00 |
| Carbamidomethyl          | 57.02 | N-term                   | 7    | 75.61  | 3.09E4    | 45.01   |

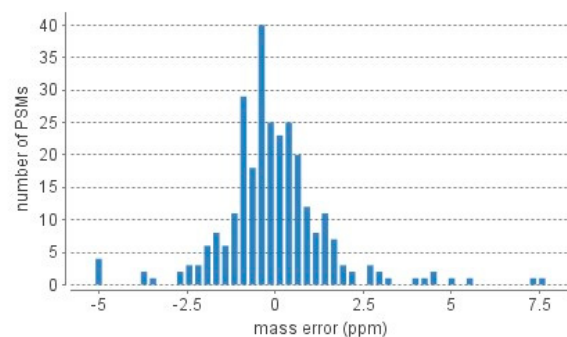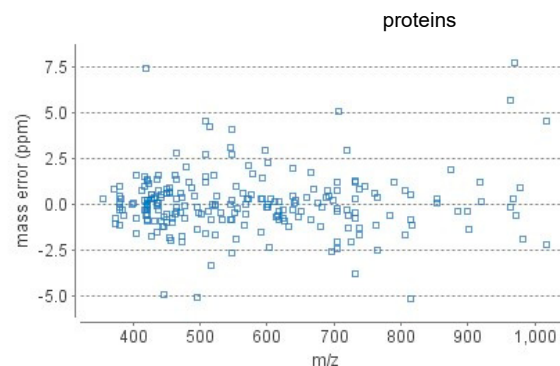

**Table 5.** Number of identified peptides in each sample by the number of missed cleavages.

Missed Cleavages 0 1 2 3 4+ Control RAW 15 106 74 4 0 0

## 4. Other Information

**Table 6.** Search parameters.

PEAKS Version: PEAKS Studio 10.6 build 20201015

Search Engine Name: PEAKS

Parent Mass Error Tolerance: 10.0 ppm

Fragment Mass Error Tolerance: 0.02 Da

Precursor Mass Search Type: monoisotopic

Enzyme: Trypsin

Max Missed Cleavages: 2

Digest Mode: Semispecific

Fixed Modifications:

Carbamidomethylation: 57.02

Variable Modifications:

Oxidation (M): 15.99

Deamidation (NQ): 0.98

Acetylation (K): 42.01

Acetylation (Protein N-term): 42.01

Acetylation (N-term): 42.01

Amidation: -0.98

Beta-methylthiolation: 45.99

Biotinylation: 226.08 and

303 more...

Max Variable PTM Per Peptide: 3

Database: Corylus aveliana iz 2020 od 156 KB

Taxon: All

Contaminant Database: crap

Searched Entry: 602

**Table 7.** Instrument parameters.

Fractions: 15x.raw

Ion Source: ESI(nano-spray)

Fragmentation Mode: CID, CAD(y and b ions)

MS Scan Mode: FT-ICR/Orbitrap

MS/MS Scan Mode: FT-ICR/Orbitrap

12/1/21, 1:26 PM

proteins

FDR Estimation: Enabled  
 De novo score(%) threshold: 15  
 Peptide hit threshold (-10logP): 30.0  
 Peaks run ID: 108  
 Merge Options: no merge  
 Precursor Options: corrected  
 Charge Options: no correction  
 Filter m/z: 200.0 - 2000.0  
 Filter Charge: 2 - 8  
 Process: true  
 Associate chimera: yes

## Protein List

Protein Accession Contains:

Protein Description Contains:

Protein Sample Area >=

Protein PTM Contains:

| Protein Group     | Protein ID | Accession                                   | - 10lgP | Coverage (%) | Coverage (%) Control RAW 15 | Area Control RAW 15 | #Peptides | #Unique | #Spec Control RAW 15 | PTM | Avg. Mass | Description                                                                              |
|-------------------|------------|---------------------------------------------|---------|--------------|-----------------------------|---------------------|-----------|---------|----------------------|-----|-----------|------------------------------------------------------------------------------------------|
| 2                 | 10066      | <a href="#">Q8W1C2 Q8W1C2_CORAV</a>         | 454.66  | 21           | 21                          | 3.7691E5            | 27        | 4       | 70                   | Y   | 59127     | 11S globulin-like protein OS=Corylus avellana OX=13451 PE=2 SV=1                         |
| 1                 | 10065      | <a href="#">A0A0A0P7E3 A0A0A0P7E3_CORAV</a> | 450.60  | 21           | 21                          | 1.7825E6            | 26        | 3       | 80                   | Y   | 58837     | Cor a 9 allergen OS=Corylus avellana OX=13451 PE=2 SV=1                                  |
| 8                 | 10069      | <a href="#">sp Q9ATH2 NLTP_CORAV</a>        | 252.49  | 57           | 57                          | 1.3556E6            | 7         | 7       | 14                   | Y   | 11806     | Non-specific lipid-transfer protein Cor a 8 OS=Corylus avellana OX=13451 PE=1 SV=1       |
| 12                | 10123      | <a href="#">D0PWG2 D0PWG2_CORAV</a>         | 62.51   | 6            | 6                           | 1.8414E4            | 1         | 1       | 1                    | Y   | 17078     | 2S albumin OS=Corylus avellana OX=13451 PE=2 SV=1                                        |
| 15                | 10100      | <a href="#">C7A7I7 C7A7I7_CORAV</a>         | 49.90   | 5            | 5                           | 1.8409E4            | 1         | 1       | 1                    | N   | 18167     | NBS-containing resistance-like protein (Fragment) OS=Corylus avellana OX=13451 PE=4 SV=1 |
| 15                | 10099      | <a href="#">C7A748 C7A748_CORAV</a>         | 49.90   | 5            | 5                           | 1.8409E4            | 1         | 1       | 1                    | N   | 18297     | NBS-containing resistance-like protein (Fragment) OS=Corylus avellana OX=13451 PE=4 SV=1 |
| 15                | 10101      | <a href="#">C7A766 C7A766_CORAV</a>         | 49.90   | 5            | 5                           | 1.8409E4            | 1         | 1       | 1                    | N   | 18332     | NBS-containing resistance-like protein (Fragment) OS=Corylus avellana OX=13451 PE=4 SV=1 |
| 15                | 10105      | <a href="#">C7A767 C7A767_CORAV</a>         | 49.90   | 5            | 5                           | 1.8409E4            | 1         | 1       | 1                    | N   | 18828     | NBS-containing resistance-like protein (Fragment) OS=Corylus avellana OX=13451 PE=4 SV=1 |
| 15                | 10104      | <a href="#">C7A763 C7A763_CORAV</a>         | 49.90   | 5            | 5                           | 1.8409E4            | 1         | 1       | 1                    | N   | 18886     | NBS-containing resistance-like protein (Fragment) OS=Corylus avellana OX=13451 PE=4 SV=1 |
| 15                | 10103      | <a href="#">C7A770 C7A770_CORAV</a>         | 49.90   | 5            | 5                           | 1.8409E4            | 1         | 1       | 1                    | N   | 18902     | NBS-containing resistance-like protein (Fragment) OS=Corylus avellana OX=13451 PE=4 SV=1 |
| 15                | 10102      | <a href="#">C7A765 C7A765_CORAV</a>         | 49.90   | 5            | 5                           | 1.8409E4            | 1         | 1       | 1                    | N   | 18943     | NBS-containing resistance-like protein (Fragment) OS=Corylus avellana OX=13451 PE=4 SV=1 |
| total 11 proteins |            |                                             |         |              |                             |                     |           |         |                      |     |           |                                                                                          |

[Q8W1C2|Q8W1C2\\_CORAV](#)

[back to list](#)

| [Protein Coverage](#) | [Supporting Peptides](#) |

Protein Coverage:

 Carbamidomethylation (+57.02)  
 Carbamidomethylation (DHKE, X@N-term) (+57.02)  
 Deamidation (NQ) (+0.98)

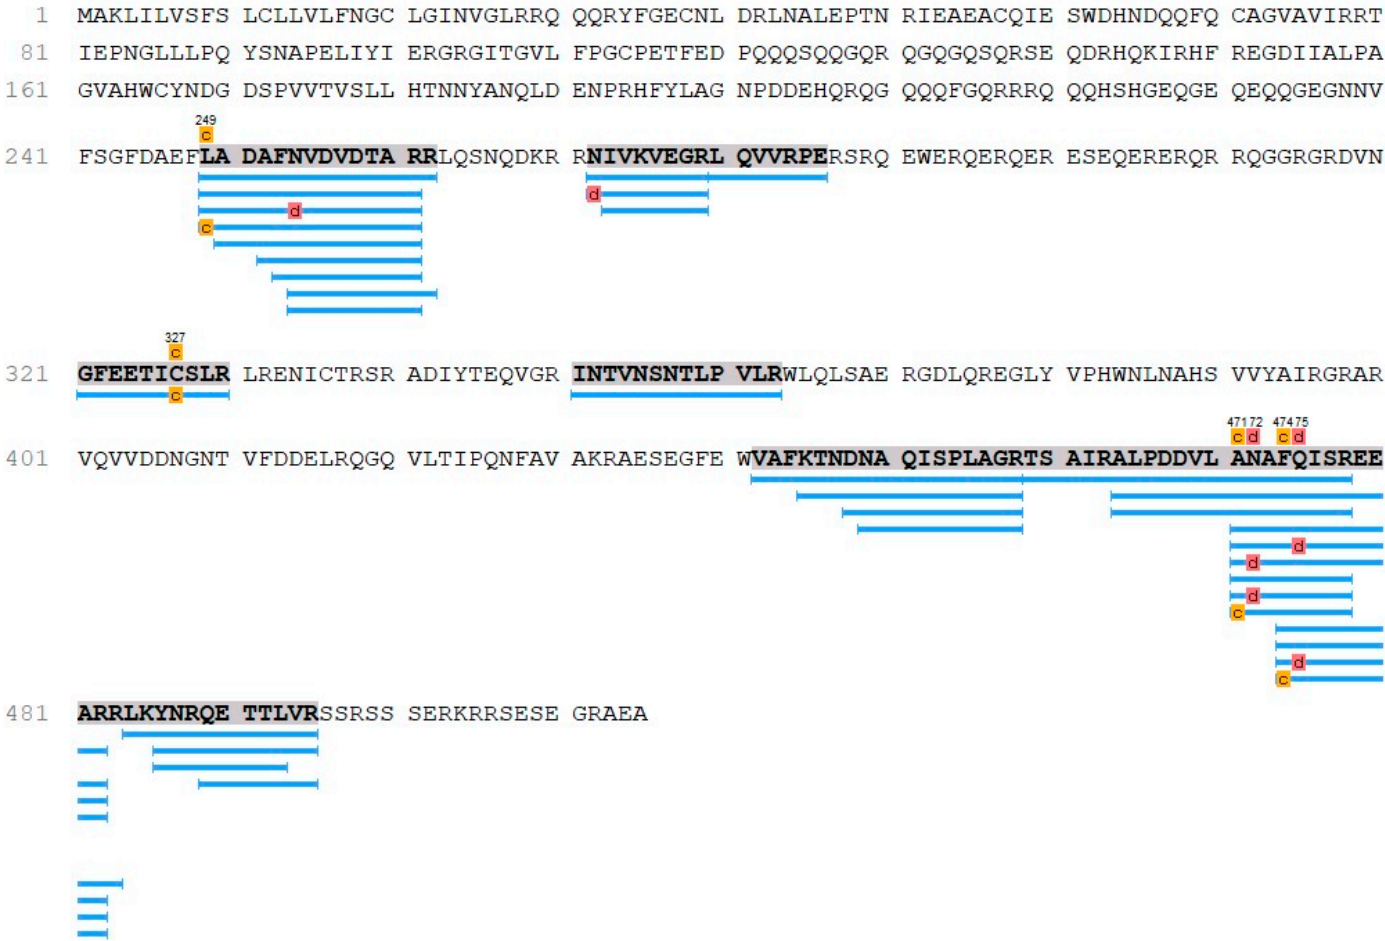

Supporting Peptides:

| Peptide             | Uniq | <sup>-</sup> 10lgP | Mass      | Length | ppm              | m/z      | z | RT    | Fraction | Scan | Source File | Area Control RAW 15 | #Feature | #Feature Control RAW 15 | Start | End | PTM | AScore | Found By |
|---------------------|------|--------------------|-----------|--------|------------------|----------|---|-------|----------|------|-------------|---------------------|----------|-------------------------|-------|-----|-----|--------|----------|
| R.ALPPDVLANAFQISR.E | N    | 174.35             | 1628.8522 | 15     | <sup>-</sup> 0.8 | 815.4327 | 2 | 13.41 | 17       | 5288 | 15x.raw     | 1.9815E5            | 2        | 2                       | 464   | 478 |     |        | PEAKS DB |
| K.YNRQETTLVR.S      | Y    | 128.25             | 1278.6680 | 10     | 0.5              | 427.2302 | 3 | 8.30  | 17       | 3261 | 15x.raw     | 1.8659E5            | 1        | 1                       | 486   | 495 |     |        | PEAKS DB |
| F.LADAFNVDVTAR.R    | N    | 115.74             | 1405.6837 | 13     | <sup>-</sup> 0.4 | 703.8489 | 2 | 11.37 | 17       | 4506 | 15x.raw     | 1.7726E6            | 1        | 1                       | 249   | 261 |     |        | PEAKS DB |
| N.DNAQISPLAGR.T     | N    | 105.15             | 1140.5887 | 11     | 2.1              | 571.3029 | 2 | 10.13 | 17       | 4001 | 15x.raw     | 1.3105E4            | 1        | 1                       | 448   | 458 |     |        | PEAKS DB |
| L.ANAFQISREEAR.R    | N    | 104.01             | 1390.6953 | 12     | <sup>-</sup> 0.4 | 464.5722 | 3 | 9.23  | 17       | 3633 | 15x.raw     | 5.2959E5            | 2        | 2                       | 471   | 482 |     |        | PEAKS DB |

| F.KTNDNAQISPLAGR.T           | N    | 102.82 | 1483.7743 | 14     | -0.1 | 495.5986 | 3 | 8.97  | 17       | 3537 | 15x.raw     | 4.082E4             | 1        | 1                       | 445   | 458 |                                       |                                                  | PEAKS DB  |
|------------------------------|------|--------|-----------|--------|------|----------|---|-------|----------|------|-------------|---------------------|----------|-------------------------|-------|-----|---------------------------------------|--------------------------------------------------|-----------|
| <b>total 41 peptides</b>     |      |        |           |        |      |          |   |       |          |      |             |                     |          |                         |       |     |                                       |                                                  |           |
| Peptide                      | Uniq | -10lgP | Mass      | Length | ppm  | m/z      | z | RT    | Fraction | Scan | Source File | Area Control RAW 15 | #Feature | #Feature Control RAW 15 | Start | End | PTM                                   | AScore                                           | Found By  |
| R.ALPPDVLANAFQISREER.R       | N    | 100.49 | 2114.0754 | 19     | 1.2  | 705.7000 | 3 | 12.86 | 17       | 5104 | 15x.raw     | 3.6677E5            | 2        | 2                       | 464   | 482 |                                       |                                                  | PEAKS DB  |
| L.ANAFQISR.E                 | N    | 100.01 | 905.4719  | 8      | 0.6  | 453.7435 | 2 | 9.83  | 17       | 3875 | 15x.raw     | 2.8406E5            | 1        | 1                       | 471   | 478 |                                       |                                                  | PEAKS DB  |
| R.TSAIRALPPDVLANAFQISR.E     | N    | 98.33  | 2157.1541 | 20     | 2.9  | 720.0607 | 3 | 12.99 | 17       | 5132 | 15x.raw     | 0                   | 0        | 0                       | 459   | 478 |                                       |                                                  | PEAKS DB  |
| D.AFNVDVDTAR.R               | N    | 95.68  | 1106.5356 | 10     | 1.0  | 554.2756 | 2 | 10.35 | 17       | 4087 | 15x.raw     | 3.9169E4            | 1        | 1                       | 252   | 261 |                                       |                                                  | PEAKS DB  |
| L.ADAFNVDVDTAR.R             | N    | 94.57  | 1292.5996 | 12     | -0.7 | 647.3066 | 2 | 10.77 | 17       | 4268 | 15x.raw     | 1.5168E4            | 1        | 1                       | 250   | 261 |                                       |                                                  | PEAKS DB  |
| R.ALPPDVLAN(+.98)AFQISREER.R | N    | 86.61  | 2115.0596 | 19     | 5.1  | 706.0307 | 3 | 12.99 | 17       | 5134 | 15x.raw     | 0                   | 0        | 0                       | 464   | 482 |                                       | N9:Deamidation (NQ):0.00                         | PEAKS DB  |
| W.VAFKTNDNAQISPLAGR.T        | N    | 86.51  | 1800.9482 | 17     | 2.2  | 601.3247 | 3 | 10.20 | 17       | 4030 | 15x.raw     | 5.5813E4            | 1        | 1                       | 442   | 458 |                                       |                                                  | PEAKS DB  |
| A.FNVDVDTAR.R                | N    | 79.83  | 1035.4985 | 9      | 0.0  | 518.7565 | 2 | 10.19 | 17       | 4023 | 15x.raw     | 5.5892E4            | 1        | 1                       | 253   | 261 |                                       |                                                  | PEAKS DB  |
| F.LADAFNVDVDTARR.L           | N    | 75.75  | 1561.7848 | 14     | -0.1 | 521.6022 | 3 | 10.60 | 17       | 4185 | 15x.raw     | 6.478E5             | 1        | 1                       | 249   | 262 |                                       |                                                  | PEAKS DB  |
| F.L(+57.02)ADAFNVDVDTAR.R    | N    | 75.61  | 1462.7052 | 13     | -0.8 | 732.3593 | 2 | 11.49 | 17       | 4541 | 15x.raw     | 3.0871E4            | 1        | 1                       | 249   | 261 | Carbamidomethylation (DHKE, X@N-term) | L1:Carbamidomethylation (DHKE, X@N-term):45.01   | PEAKS PTM |
| K.YNRQ(+.98)ETTLVR.S         | Y    | 73.71  | 1279.6521 | 10     | 0.5  | 427.5582 | 3 | 8.51  | 17       | 3357 | 15x.raw     | 1.5196E4            | 1        | 1                       | 486   | 495 |                                       | Q4:Deamidation (NQ):0.00                         | PEAKS DB  |
| L.A(+57.02)NAFQISR.E         | N    | 73.61  | 962.4933  | 8      | 1.2  | 482.2545 | 2 | 9.87  | 17       | 3895 | 15x.raw     | 2.1389E4            | 1        | 1                       | 471   | 478 | Carbamidomethylation (DHKE, X@N-term) | A1:Carbamidomethylation (DHKE, X@N-term):1000.00 | PEAKS PTM |
| L.AN(+.98)AFQISR.E           | N    | 73.14  | 906.4559  | 8      | -1.8 | 454.2344 | 2 | 10.19 | 17       | 4031 | 15x.raw     | 1.4985E4            | 1        | 1                       | 471   | 478 | Deamidation (NQ)                      | N2:Deamidation (NQ):47.09                        | PEAKS DB  |
| R.INTVNSNTLPVLR.W            | N    | 69.84  | 1439.8096 | 13     | -0.6 | 720.9116 | 2 | 11.23 | 17       | 4456 | 15x.raw     | 1.5255E4            | 1        | 1                       | 351   | 363 |                                       |                                                  | PEAKS DB  |
| K.YNRQETTL.V                 | N    | 67.69  | 1023.4985 | 8      | -0.4 | 512.7563 | 2 | 8.75  | 17       | 3445 | 15x.raw     | 5.5087E4            | 1        | 1                       | 486   | 493 |                                       |                                                  | PEAKS DB  |
| F.NVDVDTAR.R                 | N    | 67.48  | 888.4301  | 8      | -0.6 | 445.2220 | 2 | 8.13  | 17       | 3193 | 15x.raw     | 1.3638E5            | 1        | 1                       | 254   | 261 |                                       |                                                  | PEAKS DB  |
| D.NAQISPLAGR.T               | N    | 67.35  | 1025.5618 | 10     | 4.3  | 513.7903 | 2 | 9.68  | 17       | 3819 | 15x.raw     | 0                   | 0        | 0                       | 449   | 458 |                                       |                                                  | PEAKS DB  |
| N.GFEETIC(+57.02)SLR.L       | N    | 67.02  | 1210.5652 | 10     | 0.3  | 606.2900 | 2 | 11.47 | 17       | 4538 | 15x.raw     | 1.5075E4            | 1        | 1                       | 321   | 330 | Carbamidomethylation                  | C7:Carbamidomethylation:1000.00                  | PEAKS DB  |
| R.NIVKVEGR.L                 | N    | 65.51  | 913.5345  | 8      | -0.8 | 457.7742 | 2 | 7.91  | 17       | 3130 | 15x.raw     | 1.5869E5            | 1        | 1                       | 272   | 279 |                                       |                                                  | PEAKS DB  |
| A.FQISREER.R                 | N    | 63.88  | 1134.5781 | 9      | -0.6 | 568.2960 | 2 | 8.65  | 17       | 3401 | 15x.raw     | 6.2552E5            | 1        | 1                       | 474   | 482 |                                       |                                                  | PEAKS DB  |
| L.ANAFQ(+.98)ISREER.R        | N    | 63.36  | 1391.6793 | 12     | 2.8  | 464.9017 | 3 | 9.43  | 17       | 3715 | 15x.raw     | 3.5685E4            | 1        | 1                       | 471   | 482 | Deamidation (NQ)                      | Q5:Deamidation (NQ):47.09                        | PEAKS DB  |

| A.F(+57.02)QISREEAR.R   | N    | 60.14 | 1191.5996 | 9      | 0.0  | 398.2072 | 3 | 8.91  | 17       | 3527 | 15x.raw     | 9.8057E5            | 1        | 1                       | 474   | 482 | Carbamidomethylation (DHKE, X@N-term) | F1:Carbamidomethylation (DHKE, X@N-term):47.14 | PEAKS PTM |
|-------------------------|------|-------|-----------|--------|------|----------|---|-------|----------|------|-------------|---------------------|----------|-------------------------|-------|-----|---------------------------------------|------------------------------------------------|-----------|
| R.LQVVRPE.R             | Y    | 55.26 | 839.4865  | 7      | -0.2 | 420.7504 | 2 | 9.35  | 17       | 3690 | 15x.raw     | 9.8418E4            | 1        | 1                       | 280   | 286 |                                       |                                                | PEAKS DB  |
| R.N(+.98)IVKVEGR.L      | N    | 54.25 | 914.5185  | 8      | -1.0 | 458.2661 | 2 | 8.57  | 17       | 3378 | 15x.raw     | 0                   | 0        | 0                       | 272   | 279 | Deamidation (NQ)                      | N1:Deamidation (NQ):1000.00                    | PEAKS DB  |
| F.N(+57.02)VDVDTAR.R    | N    | 53.82 | 945.4515  | 8      | -2.0 | 473.7321 | 2 | 8.36  | 17       | 3295 | 15x.raw     | 0                   | 0        | 0                       | 254   | 261 |                                       | N1:Carbamidomethylation (DHKE, X@N-term):14.04 | PEAKS PTM |
| A.FQ(+.98)ISREEAR.R     | N    | 53.80 | 1135.5621 | 9      | -1.1 | 379.5276 | 3 | 8.83  | 17       | 3488 | 15x.raw     | 7.3333E5            | 2        | 2                       | 474   | 482 | Deamidation (NQ)                      | Q2:Deamidation (NQ):1000.00                    | PEAKS DB  |
| R.QE(+14.02)TTLVR.S     | Y    | 53.48 | 859.4763  | 7      | 0.4  | 430.7456 | 2 | 9.06  | 17       | 3569 | 15x.raw     | 2.5652E4            | 1        | 1                       | 489   | 495 |                                       | E2:Methylation(others):10.11                   | PEAKS PTM |
| L.AN(+.98)AFQISREEAR.R  | N    | 53.42 | 1391.6793 | 12     | 0.3  | 464.9005 | 3 | 9.72  | 17       | 3840 | 15x.raw     | 2.5205E4            | 1        | 1                       | 471   | 482 | Deamidation (NQ)                      | N2:Deamidation (NQ):47.09                      | PEAKS DB  |
| F.LADAFN(+.98)VDVDTAR.R | N    | 50.81 | 1406.6677 | 13     | -2.0 | 704.3397 | 2 | 11.63 | 17       | 4595 | 15x.raw     | 0                   | 0        | 0                       | 249   | 261 | Deamidation (NQ)                      | N6:Deamidation (NQ):1000.00                    | PEAKS DB  |
| total 41 peptides       |      |       |           |        |      |          |   |       |          |      |             |                     |          |                         |       |     |                                       |                                                |           |
| Peptide                 | Uniq | 10lgP | Mass      | Length | ppm  | m/z      | z | RT    | Fraction | Scan | Source File | Area Control RAW 15 | #Feature | #Feature Control RAW 15 | Start | End | PTM                                   | AScore                                         | Found By  |
| R.LKYNRQETTLVR.S        | Y    | 50.11 | 1519.8470 | 12     | 0.3  | 380.9691 | 4 | 8.56  | 17       | 3369 | 15x.raw     | 5.1059E4            | 2        | 2                       | 484   | 495 |                                       |                                                | PEAKS DB  |
| A.FQISREEARR.L          | N    | 49.43 | 1290.6792 | 10     | 0.3  | 431.2338 | 3 | 8.11  | 17       | 3186 | 15x.raw     | 2.4722E5            | 1        | 1                       | 474   | 483 |                                       |                                                | PEAKS DB  |
| A.FQISR(+14.02)EEAR.R   | N    | 45.09 | 1148.5938 | 9      | -0.3 | 383.8717 | 3 | 9.12  | 17       | 3597 | 15x.raw     | 5.8729E5            | 1        | 1                       | 474   | 482 |                                       | R5:Methylation(KR):8.26                        | PEAKS PTM |
| F.NVDVDTARR.L           | N    | 44.87 | 1044.5312 | 9      | -1.7 | 523.2720 | 2 | 7.54  | 17       | 2967 | 15x.raw     | 2.9001E4            | 1        | 1                       | 254   | 262 |                                       |                                                | PEAKS DB  |
| N.IVKVEGR.L             | N    | 42.89 | 799.4916  | 7      | 0.0  | 400.7531 | 2 | 7.90  | 17       | 3112 | 15x.raw     | 0                   | 0        | 0                       | 273   | 279 |                                       |                                                | PEAKS DB  |
| R.N(+27.99)IVKVEGR.L    | N    | 42.89 | 941.5294  | 8      | 0.6  | 471.7723 | 2 | 9.64  | 17       | 3802 | 15x.raw     | 0                   | 0        | 0                       | 272   | 279 |                                       | N1:Formylation:12.33                           | PEAKS PTM |
| total 41 peptides       |      |       |           |        |      |          |   |       |          |      |             |                     |          |                         |       |     |                                       |                                                |           |

A0A0A0P7E3|A0A0A0P7E3\_CORAV

back to list

| [Protein Coverage](#) | [Supporting Peptides](#) |

Protein Coverage:



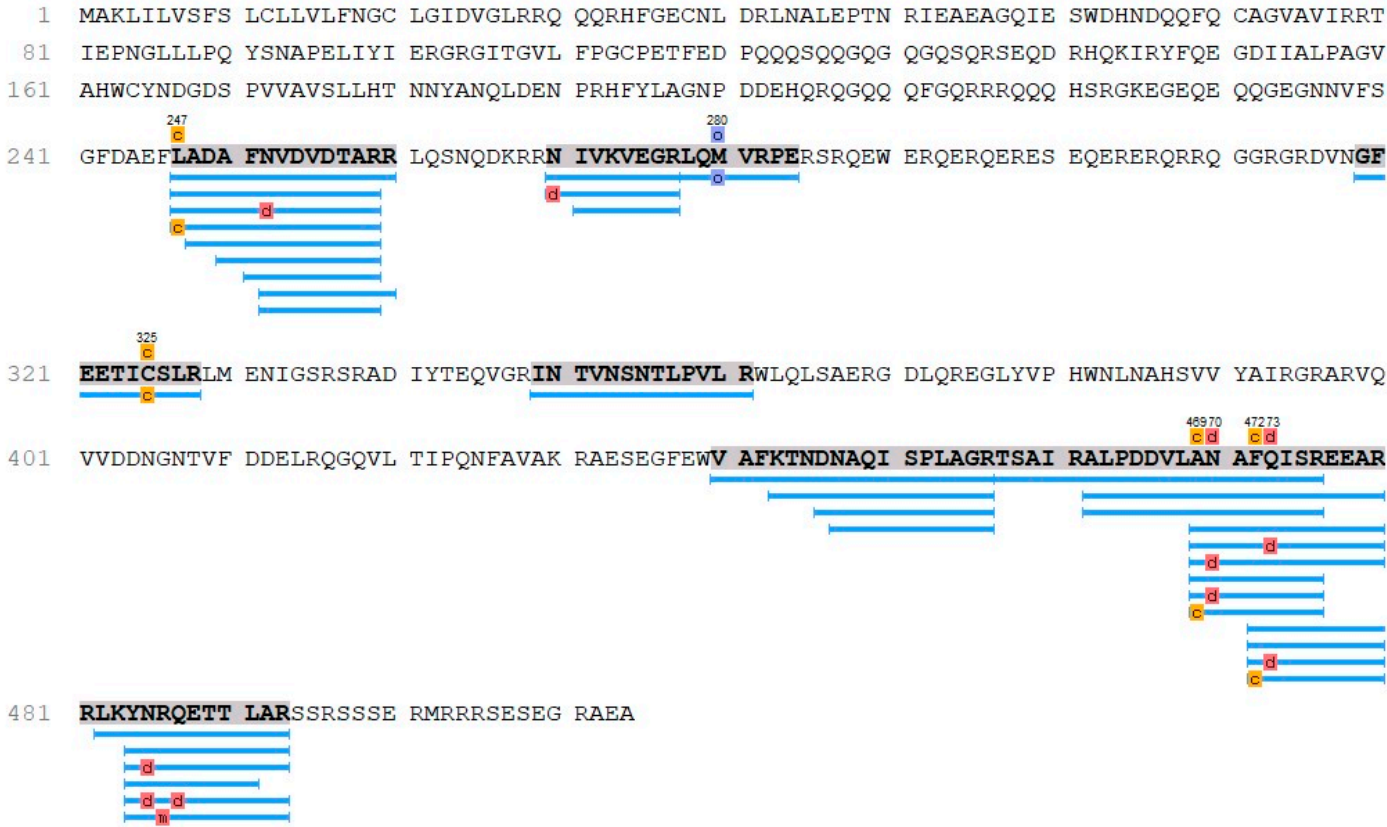

Carbamidomethylation (+57.02)  
Carbamidomethylation (DHKE, X@N-term) (+57.02)  
Deamidation (NQ) (+0.98)  
Methylation(KR) (+14.02)  
Oxidation (M) (+15.99)

Supporting Peptides:

| Peptide              | Uniq | -10lgP | Mass      | Length | ppm  | m/z      | z | RT    | Fraction | Scan | Source File | Area Control RAW 15 | #Feature | #Feature Control RAW 15 | Start | End | PTM | AScore                    | Found By |
|----------------------|------|--------|-----------|--------|------|----------|---|-------|----------|------|-------------|---------------------|----------|-------------------------|-------|-----|-----|---------------------------|----------|
| R.ALPPDVLANAFQISR.E  | N    | 174.35 | 1628.8522 | 15     | -0.8 | 815.4327 | 2 | 13.41 | 17       | 5288 | 15x.raw     | 1.9815E5            | 2        | 2                       | 462   | 476 |     |                           | PEAKS DB |
| K.YNRQ(+.98)ETTLAR.S | Y    | 121.31 | 1251.6207 | 10     | -0.6 | 418.2139 | 3 | 7.98  | 17       | 3147 | 15x.raw     | 9.4455E4            | 1        | 1                       | 484   | 493 |     | Q4:Deamidation (NQ):13.67 | PEAKS DB |
| K.YNRQETTLAR.S       | Y    | 121.17 | 1250.6367 | 10     | -0.3 | 417.8860 | 3 | 7.75  | 17       | 3054 | 15x.raw     | 1.1452E6            | 3        | 3                       | 484   | 493 |     |                           | PEAKS DB |
| F.LADAFNVDVDTAR.R    | N    | 115.74 | 1405.6837 | 13     | -0.4 | 703.8489 | 2 | 11.37 | 17       | 4506 | 15x.raw     | 1.7726E6            | 1        | 1                       | 247   | 259 |     |                           | PEAKS DB |
| N.DNAQISPLAGR.T      | N    | 105.15 | 1140.5887 | 11     | 2.1  | 571.3029 | 2 | 10.13 | 17       | 4001 | 15x.raw     | 1.3105E4            | 1        | 1                       | 446   | 456 |     |                           | PEAKS DB |
| L.ANAFQISREEAR.R     | N    | 104.01 | 1390.6953 | 12     | -0.4 | 464.5722 | 3 | 9.23  | 17       | 3633 | 15x.raw     | 5.2959E5            | 2        | 2                       | 469   | 480 |     |                           | PEAKS DB |

| F.KTNDNAQISPLAGR.T           | N    | 102.82 | 1483.7743 | 14     | -0.1 | 495.5986 | 3 | 8.97  | 17       | 3537 | 15x.raw     | 4.082E4             | 1        | 1                       | 443   | 456 |                                       |                                                  | PEAKS DB  |
|------------------------------|------|--------|-----------|--------|------|----------|---|-------|----------|------|-------------|---------------------|----------|-------------------------|-------|-----|---------------------------------------|--------------------------------------------------|-----------|
| R.ALPPDVLANAFQISREER.R       | N    | 100.49 | 2114.0754 | 19     | 1.2  | 705.7000 | 3 | 12.86 | 17       | 5104 | 15x.raw     | 3.6677E5            | 2        | 2                       | 462   | 480 |                                       |                                                  | PEAKS DB  |
| L.ANAFQISR.E                 | N    | 100.01 | 905.4719  | 8      | 0.6  | 453.7435 | 2 | 9.83  | 17       | 3875 | 15x.raw     | 2.8406E5            | 1        | 1                       | 469   | 476 |                                       |                                                  | PEAKS DB  |
| R.TSAIRALPPDVLANAFQISR.E     | N    | 98.33  | 2157.1541 | 20     | 2.9  | 720.0607 | 3 | 12.99 | 17       | 5132 | 15x.raw     | 0                   | 0        | 0                       | 457   | 476 |                                       |                                                  | PEAKS DB  |
| D.AFNVDVDTAR.R               | N    | 95.68  | 1106.5356 | 10     | 1.0  | 554.2756 | 2 | 10.35 | 17       | 4087 | 15x.raw     | 3.9169E4            | 1        | 1                       | 250   | 259 |                                       |                                                  | PEAKS DB  |
| L.ADAFNVDVDTAR.R             | N    | 94.57  | 1292.5996 | 12     | -0.7 | 647.3066 | 2 | 10.77 | 17       | 4268 | 15x.raw     | 1.5168E4            | 1        | 1                       | 248   | 259 |                                       |                                                  | PEAKS DB  |
| R.ALPPDVLAN(+.98)AFQISREER.R | N    | 86.61  | 2115.0596 | 19     | 5.1  | 706.0307 | 3 | 12.99 | 17       | 5134 | 15x.raw     | 0                   | 0        | 0                       | 462   | 480 |                                       | N9:Deamidation (NQ):0.00                         | PEAKS DB  |
| W.VAFKTNDNAQISPLAGR.T        | N    | 86.51  | 1800.9482 | 17     | 2.2  | 601.3247 | 3 | 10.20 | 17       | 4030 | 15x.raw     | 5.5813E4            | 1        | 1                       | 440   | 456 |                                       |                                                  | PEAKS DB  |
| K.YN(+.98)RQETTLAR.S         | Y    | 86.15  | 1251.6207 | 10     | -0.3 | 418.2141 | 3 | 8.20  | 17       | 3232 | 15x.raw     | 2.2138E4            | 1        | 1                       | 484   | 493 | Deamidation (NQ)                      | N2:Deamidation (NQ):26.31                        | PEAKS DB  |
| A.FNVDVDTAR.R                | N    | 79.83  | 1035.4985 | 9      | 0.0  | 518.7565 | 2 | 10.19 | 17       | 4023 | 15x.raw     | 5.5892E4            | 1        | 1                       | 251   | 259 |                                       |                                                  | PEAKS DB  |
| R.LKYNRQETTLAR.S             | Y    | 78.44  | 1491.8158 | 12     | -0.4 | 498.2790 | 3 | 8.12  | 17       | 3192 | 15x.raw     | 3.0662E5            | 2        | 2                       | 482   | 493 |                                       |                                                  | PEAKS DB  |
| F.LADAFNVDVDTARR.L           | N    | 75.75  | 1561.7848 | 14     | -0.1 | 521.6022 | 3 | 10.60 | 17       | 4185 | 15x.raw     | 6.478E5             | 1        | 1                       | 247   | 260 |                                       |                                                  | PEAKS DB  |
| F.L(+57.02)ADAFNVDVDTAR.R    | N    | 75.61  | 1462.7052 | 13     | -0.8 | 732.3593 | 2 | 11.49 | 17       | 4541 | 15x.raw     | 3.0871E4            | 1        | 1                       | 247   | 259 | Carbamidomethylation (DHKE, X@N-term) | L1:Carbamidomethylation (DHKE, X@N-term):45.01   | PEAKS PTM |
| L.A(+57.02)NAFQISR.E         | N    | 73.61  | 962.4933  | 8      | 1.2  | 482.2545 | 2 | 9.87  | 17       | 3895 | 15x.raw     | 2.1389E4            | 1        | 1                       | 469   | 476 | Carbamidomethylation (DHKE, X@N-term) | A1:Carbamidomethylation (DHKE, X@N-term):1000.00 | PEAKS PTM |
| L.AN(+.98)AFQISR.E           | N    | 73.14  | 906.4559  | 8      | -1.8 | 454.2344 | 2 | 10.19 | 17       | 4031 | 15x.raw     | 1.4985E4            | 1        | 1                       | 469   | 476 | Deamidation (NQ)                      | N2:Deamidation (NQ):47.09                        | PEAKS DB  |
| R.INTVNSNTLPVLR.W            | N    | 69.84  | 1439.8096 | 13     | -0.6 | 720.9116 | 2 | 11.23 | 17       | 4456 | 15x.raw     | 1.5255E4            | 1        | 1                       | 349   | 361 |                                       |                                                  | PEAKS DB  |
| K.YNRQETTL.A                 | N    | 67.69  | 1023.4985 | 8      | -0.4 | 512.7563 | 2 | 8.75  | 17       | 3445 | 15x.raw     | 5.5087E4            | 1        | 1                       | 484   | 491 |                                       |                                                  | PEAKS DB  |
| F.NVDVDTAR.R                 | N    | 67.48  | 888.4301  | 8      | -0.6 | 445.2220 | 2 | 8.13  | 17       | 3193 | 15x.raw     | 1.3638E5            | 1        | 1                       | 252   | 259 |                                       |                                                  | PEAKS DB  |
| D.NAQISPLAGR.T               | N    | 67.35  | 1025.5618 | 10     | 4.3  | 513.7903 | 2 | 9.68  | 17       | 3819 | 15x.raw     | 0                   | 0        | 0                       | 447   | 456 |                                       |                                                  | PEAKS DB  |
| N.GFEETIC(+57.02)SLR.L       | N    | 67.02  | 1210.5652 | 10     | 0.3  | 606.2900 | 2 | 11.47 | 17       | 4538 | 15x.raw     | 1.5075E4            | 1        | 1                       | 319   | 328 | Carbamidomethylation                  | C7:Carbamidomethylation:1000.00                  | PEAKS DB  |
| R.NIVKVEGR.L                 | N    | 65.51  | 913.5345  | 8      | -0.8 | 457.7742 | 2 | 7.91  | 17       | 3130 | 15x.raw     | 1.5869E5            | 1        | 1                       | 270   | 277 |                                       |                                                  | PEAKS DB  |
| A.FQISREER.R                 | N    | 63.88  | 1134.5781 | 9      | -0.6 | 568.2960 | 2 | 8.65  | 17       | 3401 | 15x.raw     | 6.2552E5            | 1        | 1                       | 472   | 480 |                                       |                                                  | PEAKS DB  |
| total 44 peptides            |      |        |           |        |      |          |   |       |          |      |             |                     |          |                         |       |     |                                       |                                                  |           |
| Peptide                      | Uniq | -10lgP | Mass      | Length | ppm  | m/z      | z | RT    | Fraction | Scan | Source File | Area Control RAW 15 | #Feature | #Feature Control RAW 15 | Start | End | PTM                                   | AScore                                           | Found By  |

|                            |   |       |           |    |      |          |   |       |    |      |         |          |   |   |     |     |                                       |                                                           |           |
|----------------------------|---|-------|-----------|----|------|----------|---|-------|----|------|---------|----------|---|---|-----|-----|---------------------------------------|-----------------------------------------------------------|-----------|
| L.ANAFQ(+.98)ISREEAR.R     | N | 63.36 | 1391.6793 | 12 | 2.8  | 464.9017 | 3 | 9.43  | 17 | 3715 | 15x.raw | 3.5685E4 | 1 | 1 | 469 | 480 | Deamidation (NQ)                      | Q5:Deamidation (NQ):47.09                                 | PEAKS DB  |
| A.F(+57.02)QISREEAR.R      | N | 60.14 | 1191.5996 | 9  | 0.0  | 398.2072 | 3 | 8.91  | 17 | 3527 | 15x.raw | 9.8057E5 | 1 | 1 | 472 | 480 | Carbamidomethylation (DHKE, X@N-term) | F1:Carbamidomethylation (D HKE, X@N-term):47.14           | PEAKS PTM |
| K.YN(+.98)RQ(+.98)ETTLAR.S | Y | 60.01 | 1252.6047 | 10 | 7.4  | 418.5453 | 3 | 7.72  | 17 | 3040 | 15x.raw | 0        | 0 | 0 | 484 | 493 | Deamidation (NQ)                      | N2:Deamidation (NQ):1000.0 0;Q4:Deamidation (NQ):100 0.00 | PEAKS DB  |
| R.N(+.98)IVKVEGR.L         | N | 54.25 | 914.5185  | 8  | -1.0 | 458.2661 | 2 | 8.57  | 17 | 3378 | 15x.raw | 0        | 0 | 0 | 270 | 277 | Deamidation (NQ)                      | N1:Deamidation (NQ):1000.0 0                              | PEAKS DB  |
| F.N(+57.02)VDVD TAR.R      | N | 53.82 | 945.4515  | 8  | -2.0 | 473.7321 | 2 | 8.36  | 17 | 3295 | 15x.raw | 0        | 0 | 0 | 252 | 259 |                                       | N1:Carbamidomethylation (D HKE, X@N-term):14.04           | PEAKS PTM |
| A.FQ(+.98)ISREEAR.R        | N | 53.80 | 1135.5621 | 9  | -1.1 | 379.5276 | 3 | 8.83  | 17 | 3488 | 15x.raw | 7.3333E5 | 2 | 2 | 472 | 480 | Deamidation (NQ)                      | Q2:Deamidation (NQ):1000.0 0                              | PEAKS DB  |
| K.YNR(+14.02)QETTLAR.S     | Y | 53.51 | 1264.6523 | 10 | 1.1  | 422.5585 | 3 | 8.25  | 17 | 3253 | 15x.raw | 1.2146E4 | 1 | 1 | 484 | 493 | Methylation(KR)                       | R3:Methylation(KR):52.22                                  | PEAKS PTM |
| L.AN(+.98)AFQISREEAR.R     | N | 53.42 | 1391.6793 | 12 | 0.3  | 464.9005 | 3 | 9.72  | 17 | 3840 | 15x.raw | 2.5205E4 | 1 | 1 | 469 | 480 | Deamidation (NQ)                      | N2:Deamidation (NQ):47.09                                 | PEAKS DB  |
| R.LQM(+15.99)VRPE.R        | Y | 53.04 | 887.4535  | 7  | -1.2 | 444.7335 | 2 | 8.26  | 17 | 3257 | 15x.raw | 2.0195E5 | 1 | 1 | 278 | 284 | Oxidation (M)                         | M3:Oxidation (M):1000.00                                  | PEAKS DB  |
| F.LADAFN(+.98)VDVD TAR.R   | N | 50.81 | 1406.6677 | 13 | -2.0 | 704.3397 | 2 | 11.63 | 17 | 4595 | 15x.raw | 0        | 0 | 0 | 247 | 259 | Deamidation (NQ)                      | N6:Deamidation (NQ):1000.0 0                              | PEAKS DB  |
| A.FQISREEARR.L             | N | 49.43 | 1290.6792 | 10 | 0.3  | 431.2338 | 3 | 8.11  | 17 | 3186 | 15x.raw | 2.4722E5 | 1 | 1 | 472 | 481 |                                       |                                                           | PEAKS DB  |
| A.FQISR(+14.02)EEAR.R      | N | 45.09 | 1148.5938 | 9  | -0.3 | 383.8717 | 3 | 9.12  | 17 | 3597 | 15x.raw | 5.8729E5 | 1 | 1 | 472 | 480 |                                       | R5:Methylation(KR):8.26                                   | PEAKS PTM |
| F.NVDVTARR.L               | N | 44.87 | 1044.5312 | 9  | -1.7 | 523.2720 | 2 | 7.54  | 17 | 2967 | 15x.raw | 2.9001E4 | 1 | 1 | 252 | 260 |                                       |                                                           | PEAKS DB  |
| R.LKYNRQ(+.98)ETTLAR.S     | Y | 43.55 | 1492.7998 | 12 | -0.8 | 374.2069 | 4 | 8.33  | 17 | 3282 | 15x.raw | 0        | 0 | 0 | 482 | 493 |                                       | Q6:Deamidation (NQ):0.00                                  | PEAKS DB  |
| N.IVKVEGR.L                | N | 42.89 | 799.4916  | 7  | 0.0  | 400.7531 | 2 | 7.90  | 17 | 3112 | 15x.raw | 0        | 0 | 0 | 271 | 277 |                                       |                                                           | PEAKS DB  |
| R.N(+27.99)IVKVEGR.L       | N | 42.89 | 941.5294  | 8  | 0.6  | 471.7723 | 2 | 9.64  | 17 | 3802 | 15x.raw | 0        | 0 | 0 | 270 | 277 |                                       | N1:Formylation:12.33                                      | PEAKS PTM |
| total 44 peptides          |   |       |           |    |      |          |   |       |    |      |         |          |   |   |     |     |                                       |                                                           |           |

sp|Q9ATH2|NLTP\_CORAV

[back to list](#)

| [Protein Coverage](#) | [Supporting Peptides](#) |

Protein Coverage:

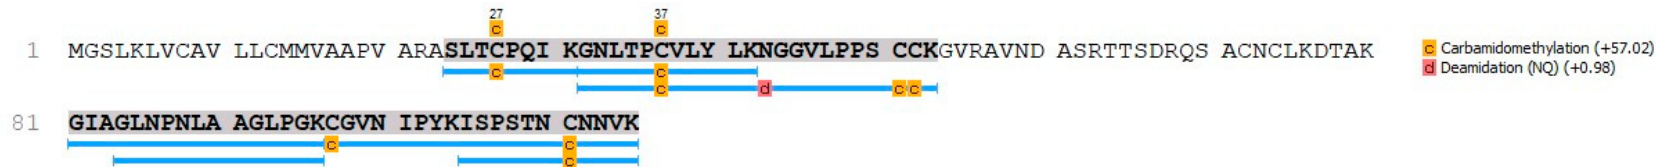

Supporting Peptides:

| Peptide                                                 | Uniq | <sup>-</sup><br>10lgP | Mass      | Length | ppm                 | m/z      | z | RT    | Fraction | Scan | Source File | Area Control RAW 15 | #Feature | #Feature Control RAW 15 | Start | End | PTM                                    | AScore                                                                                                                            | Found By |
|---------------------------------------------------------|------|-----------------------|-----------|--------|---------------------|----------|---|-------|----------|------|-------------|---------------------|----------|-------------------------|-------|-----|----------------------------------------|-----------------------------------------------------------------------------------------------------------------------------------|----------|
| K.GIAGLNPNLAAGLPGK.C                                    | Y    | 120.62                | 1461.8303 | 16     | <sup>-</sup><br>0.4 | 731.9221 | 2 | 11.89 | 17       | 4698 | 15x.raw     | 7.1362E5            | 1        | 1                       | 81    | 96  |                                        |                                                                                                                                   | PEAKS DB |
| K.GNLTPC(+57.02)VLYLK.N                                 | Y    | 112.99                | 1276.6849 | 11     | 0.5                 | 639.3500 | 2 | 11.87 | 17       | 4699 | 15x.raw     | 2.3996E5            | 1        | 1                       | 32    | 42  | Carbamidomethylation                   | C6:Carbamido methylation:1000.00                                                                                                  | PEAKS DB |
| total 8 peptides                                        |      |                       |           |        |                     |          |   |       |          |      |             |                     |          |                         |       |     |                                        |                                                                                                                                   |          |
| Peptide                                                 | Uniq | <sup>-</sup><br>10lgP | Mass      | Length | ppm                 | m/z      | z | RT    | Fraction | Scan | Source File | Area Control RAW 15 | #Feature | #Feature Control RAW 15 | Start | End | PTM                                    | AScore                                                                                                                            | Found By |
| A.SLTC(+57.02)PQIK.G                                    | Y    | 78.75                 | 945.4954  | 8      | 0.4                 | 473.7551 | 2 | 9.38  | 17       | 3708 | 15x.raw     | 3.2805E5            | 1        | 1                       | 24    | 31  | Carbamidomethylation                   | C4:Carbamido methylation:1000.00                                                                                                  | PEAKS DB |
| K.ISPSTNC(+57.02)NNVK                                   | Y    | 68.24                 | 1232.5819 | 11     | 0.2                 | 617.2983 | 2 | 7.80  | 17       | 3074 | 15x.raw     | 1.335E4             | 1        | 1                       | 105   | 115 | Carbamidomethylation                   | C7:Carbamido methylation:1000.00                                                                                                  | PEAKS DB |
| K.GNLTPC(+57.02)VLYLKN(+.98)GGVLPSC(+57.02)C(+57.02)K.G | Y    | 66.89                 | 2447.2012 | 22     | <sup>-</sup><br>1.2 | 816.7401 | 3 | 11.84 | 17       | 4674 | 15x.raw     | 0                   | 0        | 0                       | 32    | 53  | Carbamidomethylation; Deamidation (NQ) | C6:Carbamido methylation:1000.00; N12:Deamidation (NQ):21.51; C20:Carbamidomethylation:1000.00; C21:Carbamido methylation:1000.00 | PEAKS DB |
| K.C(+57.02)GVNIPYKISPSTNC(+57.02)NNVK                   | Y    | 65.90                 | 2164.0405 | 19     | <sup>-</sup><br>1.3 | 722.3532 | 3 | 10.33 | 17       | 4089 | 15x.raw     | 1.2868E4            | 1        | 1                       | 97    | 115 | Carbamidomethylation                   | C1:Carbamido methylation:1000.00; C15:Carbamidomethylation:1000.00                                                                | PEAKS DB |
| K.GIAGLNPN(+.98)LAAGLPGK.C                              | Y    | 55.44                 | 1462.8143 | 16     | 1.3                 | 732.4154 | 2 | 12.09 | 17       | 4791 | 15x.raw     | 1.7785E4            | 1        | 1                       | 81    | 96  |                                        | N8:Deamidation (NQ):14.04                                                                                                         | PEAKS DB |
| A.GLNPNLAAGLPGK.C                                       | Y    | 53.89                 | 1220.6876 | 13     | 0.2                 | 611.3512 | 2 | 10.96 | 17       | 4340 | 15x.raw     | 3.0011E4            | 1        | 1                       | 84    | 96  |                                        |                                                                                                                                   | PEAKS DB |

|                  |
|------------------|
| total 8 peptides |
|------------------|

D0PWG2|D0PWG2\_CORAV

back to list

| [Protein Coverage](#) | [Supporting Peptides](#) |

Protein Coverage:

1MARLATLAALFAALLLVAHA AAFRTTITTV DVDEDIVNQQ GRRGESCREQ AQRQQNLNQC QRYMRQQSQY GSYDGSNQQQ

81QQELEQCCQQ LRQMDERCRC EGLRQAVMQQ QGEMRGEEMR EVMETARDLP NQCR**LSPQRC EIR**SARF

Supporting Peptides:

| Peptide               | Uniq | -10lgP | Mass      | Length | ppm | m/z      | z | RT   | Fraction | Scan | Source File | Area Control RAW 15 | #Feature | #Feature Control RAW 15 | Start | End | PTM                  | AScore                          | Found By |
|-----------------------|------|--------|-----------|--------|-----|----------|---|------|----------|------|-------------|---------------------|----------|-------------------------|-------|-----|----------------------|---------------------------------|----------|
| R.LSPQRC(+57.02)EIR.S | Y    | 62.51  | 1157.5975 | 9      | 0.6 | 386.8729 | 3 | 7.94 | 17       | 3120 | 15x.raw     | 1.8414E4            | 1        | 1                       | 135   | 143 | Carbamidomethylation | C6:Carbamidomethylation:1000.00 | PEAKS DB |

|                  |
|------------------|
| total 1 peptides |
|------------------|

C7A7I7|C7A7I7\_CORAV

back to list

| [Protein Coverage](#) | [Supporting Peptides](#) |

Protein Coverage:

1LAEIVYKRIA DKFDASCFIP NVREETKNYG LLHLQKQVIS EILGESETNI HNLCVATNMI ANRIRKRRVL IILDDVDEDE

81QVEALAKSHN WFGHGSRIII TSRDLHFLNK LEVNTYKVKK LNNEEALELF SWKAFKKPHP EENYVELS**KD IVSYAQ**

Supporting Peptides:

| Peptide    | Uniq | -10lgP | Mass     | Length | ppm | m/z      | z | RT   | Fraction | Scan | Source File | Area Control RAW 15 | #Feature | #Feature Control RAW 15 | Start | End | PTM | AScore | Found By |
|------------|------|--------|----------|--------|-----|----------|---|------|----------|------|-------------|---------------------|----------|-------------------------|-------|-----|-----|--------|----------|
| S.KDIVSYAQ | Y    | 49.90  | 922.4760 | 8      | 1.6 | 462.2460 | 2 | 9.95 | 17       | 3928 | 15x.raw     | 1.8409E4            | 1        | 1                       | 149   | 156 |     |        | PEAKS DB |

|                  |
|------------------|
| total 1 peptides |
|------------------|

C7A748|C7A748\_CORAV

| [Protein Coverage](#) | [Supporting Peptides](#) |

Protein Coverage:

1LAEIIYKRIA NKFEASCFIH NVREETKNYG LLHLQKQVIY EILSESETNI QNLCVATNII ANRIRKRRVL IILDDVDEDE

81QVEALAMSHN WFGQGSRIII TSRDLHFLNR LEVNTYKVKK LNNTAELELF SWKAFKKSHPEENYVELS**KD IVSYAQ**

Supporting Peptides:

| Peptide    | Uniq | -10lgP | Mass     | Length | ppm | m/z      | z | RT   | Fraction | Scan | Source File | Area Control RAW 15 | #Feature | #Feature Control RAW 15 | Start | End | PTM | AScore | Found By |
|------------|------|--------|----------|--------|-----|----------|---|------|----------|------|-------------|---------------------|----------|-------------------------|-------|-----|-----|--------|----------|
| S.KDIVSYAQ | Y    | 49.90  | 922.4760 | 8      | 1.6 | 462.2460 | 2 | 9.95 | 17       | 3928 | 15x.raw     | 1.8409E4            | 1        | 1                       | 149   | 156 |     |        | PEAKS DB |

|                  |
|------------------|
| total 1 peptides |
|------------------|

C7A766|C7A766\_CORAV

| [Protein Coverage](#) | [Supporting Peptides](#) |

Protein Coverage:

1 TLAKVIYESI AYKFEASCFI PNIREQTKRH GLLYLQIQLI SQILGESETN IQINTCVATS MIANRIRQRR VLIILDDMDG  
81 DEQVQALAGS HDWFGQGSRI IITSRDLHFL KIGLGVGDDA YEVLLNNEE ALELFSRKAF KKSHPKENYV ELSKDIVSYA  
161 Q

Supporting Peptides:

| Peptide          | Uniq | -10lgP | Mass     | Length | ppm | m/z      | z | RT   | Fraction | Scan | Source File | Area RAW 15 | Control | #Feature | #Feature Control RAW 15 | Start | End | PTM | AScore | Found By |
|------------------|------|--------|----------|--------|-----|----------|---|------|----------|------|-------------|-------------|---------|----------|-------------------------|-------|-----|-----|--------|----------|
| S.KDIVSYAQ       | Y    | 49.90  | 922.4760 | 8      | 1.6 | 462.2460 | 2 | 9.95 | 17       | 3928 | 15x.raw     | 1.8409E4    |         | 1        | 1                       | 154   | 161 |     |        | PEAKS DB |
| total 1 peptides |      |        |          |        |     |          |   |      |          |      |             |             |         |          |                         |       |     |     |        |          |

C7A767|C7A767\_CORAV

[back to list](#)

| [Protein Coverage](#) | [Supporting Peptides](#) |

Protein Coverage:

1 TLAKVIYESI AYKFEASCFI PNIREQTKKH GLLYLQIQLI SQILGESETN IQINTCVATS MIANRIRQRR VLIILGDMG  
81 DEQVQALAGS HDWFGQGSRI IITSRDLHFL KIVLRDVGDV GDDTYLVELL NNEEALELFS WKAFKKPHPE KNYVELSKDI  
161 VSYAQ

Supporting Peptides:

| Peptide          | Uniq | -10lgP | Mass     | Length | ppm | m/z      | z | RT   | Fraction | Scan | Source File | Area RAW 15 | Control | #Feature | #Feature Control RAW 15 | Start | End | PTM | AScore | Found By |
|------------------|------|--------|----------|--------|-----|----------|---|------|----------|------|-------------|-------------|---------|----------|-------------------------|-------|-----|-----|--------|----------|
| S.KDIVSYAQ       | Y    | 49.90  | 922.4760 | 8      | 1.6 | 462.2460 | 2 | 9.95 | 17       | 3928 | 15x.raw     | 1.8409E4    |         | 1        | 1                       | 158   | 165 |     |        | PEAKS DB |
| total 1 peptides |      |        |          |        |     |          |   |      |          |      |             |             |         |          |                         |       |     |     |        |          |

C7A763|C7A763\_CORAV

[back to list](#)

| [Protein Coverage](#) | [Supporting Peptides](#) |

Protein Coverage:

1 TLAKVIYESI AYKFEASCFI PNIREQTKKH GLLYLQIQLI SQILGESETN IQINTCVATS MIANRIRQRR VLIILDDMDG  
81 DEQVQALAGS HDWFGQGSRI IITSRDLHFL KIVLRDVGDV GDDTYLVELL NNEEALELFS WKAFKKPHPE KNYVELSKDI  
161 VSYAQ

Supporting Peptides:

| Peptide          | Uniq | -10lgP | Mass     | Length | ppm | m/z      | z | RT   | Fraction | Scan | Source File | Area RAW 15 | Control | #Feature | #Feature Control RAW 15 | Start | End | PTM | AScore | Found By |
|------------------|------|--------|----------|--------|-----|----------|---|------|----------|------|-------------|-------------|---------|----------|-------------------------|-------|-----|-----|--------|----------|
| S.KDIVSYAQ       | Y    | 49.90  | 922.4760 | 8      | 1.6 | 462.2460 | 2 | 9.95 | 17       | 3928 | 15x.raw     | 1.8409E4    |         | 1        | 1                       | 158   | 165 |     |        | PEAKS DB |
| total 1 peptides |      |        |          |        |     |          |   |      |          |      |             |             |         |          |                         |       |     |     |        |          |

C7A770|C7A770\_CORAV

[back to list](#)

| [Protein Coverage](#) | [Supporting Peptides](#) |

Protein Coverage:

1 TLAKVIYESI AYKFEASCFI PNIREQTKKH GLLYLQIQLI SQILGESETN IQINTCVATS MIANRIRQRR VLIILDDMDG  
81 DEQVQALAGS HDWFGQGSRI IITSRDLHFL KIVLRDVGDV GDDTYEVELL NNEEALELFS WKAFKKPHPE KNYVELS **KDI**  
161 **VSYAQ**

Supporting Peptides:

| Peptide          | Uniq | -10lgP | Mass     | Length | ppm | m/z      | z | RT   | Fraction | Scan | Source File | Area RAW 15 | Control | #Feature | #Feature RAW 15 | Control | Start | End | PTM | AScore | Found By |
|------------------|------|--------|----------|--------|-----|----------|---|------|----------|------|-------------|-------------|---------|----------|-----------------|---------|-------|-----|-----|--------|----------|
| S.KDIVSYAQ       | Y    | 49.90  | 922.4760 | 8      | 1.6 | 462.2460 | 2 | 9.95 | 17       | 3928 | 15x.raw     | 1.8409E4    |         | 1        | 1               |         | 158   | 165 |     |        | PEAKS DB |
| total 1 peptides |      |        |          |        |     |          |   |      |          |      |             |             |         |          |                 |         |       |     |     |        |          |

C7A765|C7A765\_CORAV  
| Protein Coverage | Supporting Peptides |

[back to list](#)

Protein Coverage:

1 TLAKVIYESI AYKFEASCFI PNIREQTKKH GLLYLQIQLI SQILSENETN IQINTCVATS MIANRIRQRR VLIILDDMDG  
81 DEQVQALAGS HDWFGQGSRI IITSRDLHFL KIVLRDVGDV GDDTYLVELL NNEEALELFS WKAFKKPHPE KNYVELS **KDI**  
161 **VSYAQ**

Supporting Peptides:

| Peptide          | Uniq | -10lgP | Mass     | Length | ppm | m/z      | z | RT   | Fraction | Scan | Source File | Area RAW 15 | Control | RAW | #Feature | #Feature RAW 15 | Control | RAW | Start | End | PTM | AScore | Found By |
|------------------|------|--------|----------|--------|-----|----------|---|------|----------|------|-------------|-------------|---------|-----|----------|-----------------|---------|-----|-------|-----|-----|--------|----------|
| total 1 peptides |      |        |          |        |     |          |   |      |          |      |             |             |         |     |          |                 |         |     |       |     |     |        |          |
| S.KDIVSYAQ       | Y    | 49.90  | 922.4760 | 8      | 1.6 | 462.2460 | 2 | 9.95 | 17       | 3928 | 15x.raw     | 1.8409E4    |         |     | 1        | 1               |         |     | 158   | 165 |     |        | PEAKS DB |
| total 1 peptides |      |        |          |        |     |          |   |      |          |      |             |             |         |     |          |                 |         |     |       |     |     |        |          |

Peptide List



Summary

1. Notes

Cor a 8,cor a 9, cor a 11 & oleosin

Spot 15 from RAW digested hazelnut

2. Result Statistics

Figure 1. False discovery rate (FDR) curve. X axis is the number of peptides being kept. Y axis is the corresponding FDR. ?

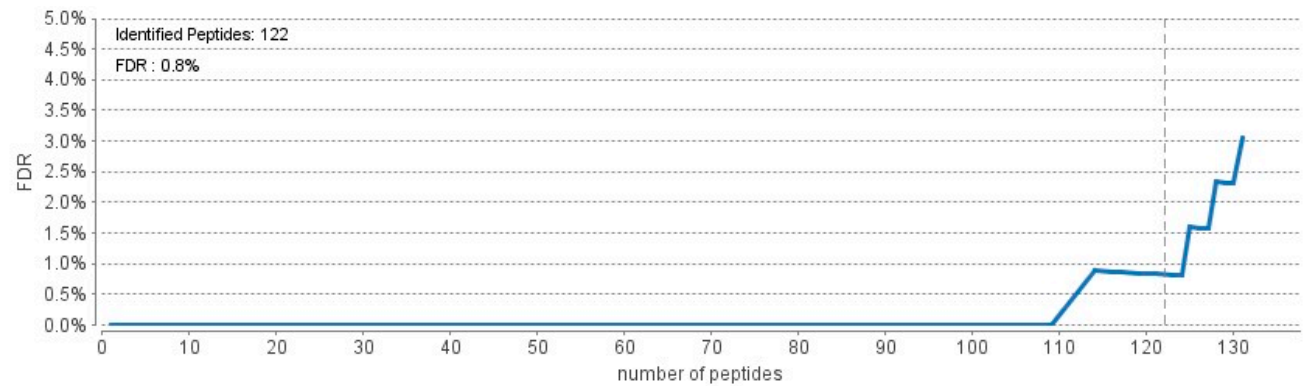

Figure 2. PSM score distribution. (a) Distribution of PEAKS peptide score; (b) Scatterplot of PEAKS peptide score versus precursor mass error. ?



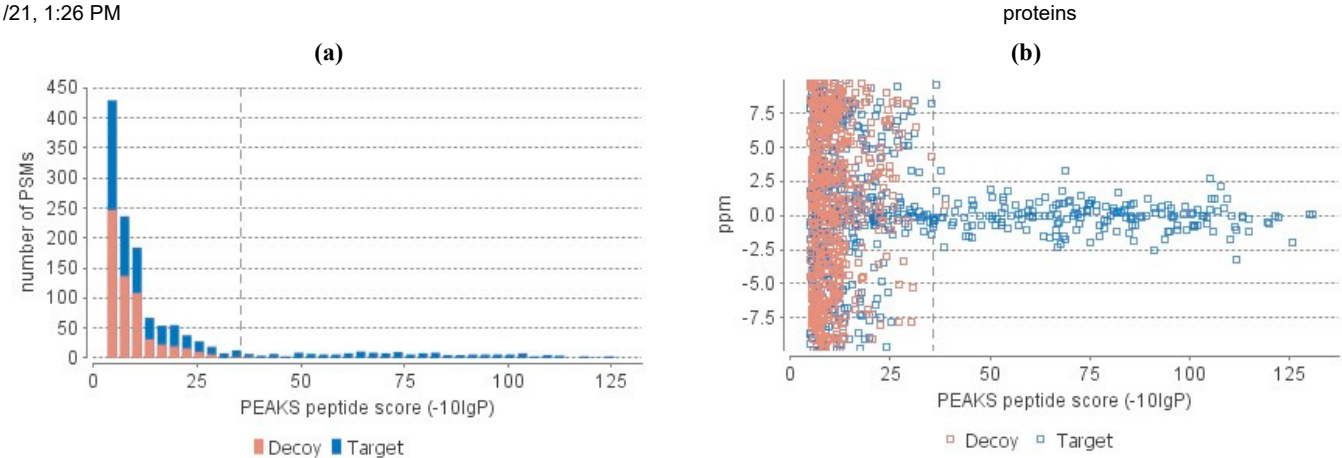

**Table 1.** Statistics of data.

|                | #Scans |       |          | #Features | Identified |        |             | #Peptides | #Sequences | #Proteins* |     |     |
|----------------|--------|-------|----------|-----------|------------|--------|-------------|-----------|------------|------------|-----|-----|
|                | MS1    | MS/MS | #Chimera |           | #PSMs      | #Scans | #Features** |           |            | Groups     | All | Top |
| Total          | 4024   | 4944  | 9        | 2954      | 186        | 186    | 102         | 122       | 116        | 5          | 5   | 5   |
| Gastric RAW 15 | 4024   | 4944  | 9        | 2954      | 186        | 186    | 102         | 122       | 116        | 5          | 5   | 5   |

\* proteins with significant peptides are used in counts.  
\*\* features are identified by DB search only.

**Figure 3.** Sample overlap for Proteins and Peptides (up to 8 samples). (a) All Proteins; (b) Top Proteins; (c) Peptides; ?

(a) (b) (c)

Not applicable to only one sample Not applicable to only one sample Not applicable to only one sample

**Figure 4.** Distribution of peptide feature detection. (a) Feature m/z distribution; (b) Feature RT distribution.

(a) (b)

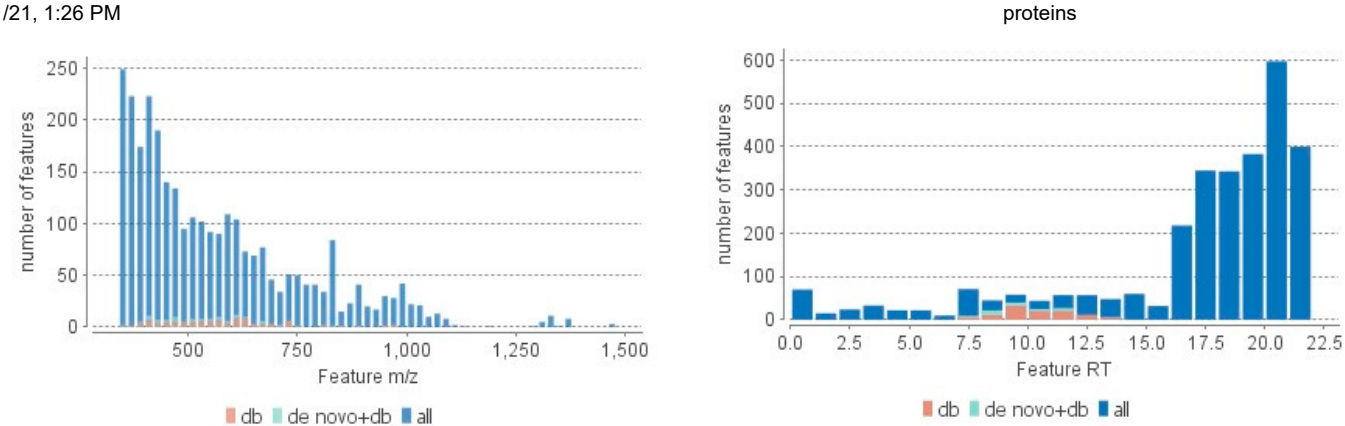

**Figure 5.** Distribution of identified peptide features. (a) Feature abundance distribution; (b) *De novo* sequencing validation. ?

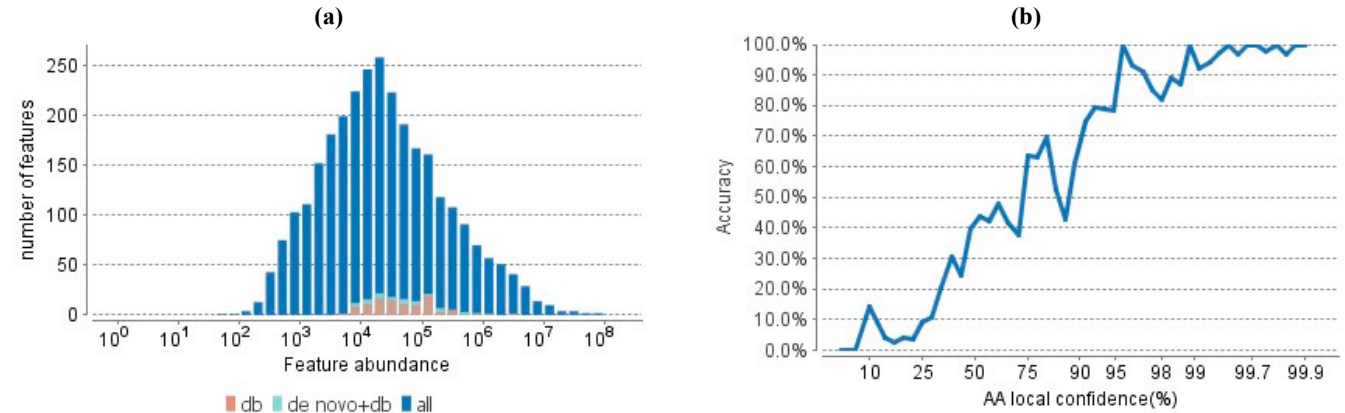

**Table 2.** Result filtration parameters.

|                          |       |
|--------------------------|-------|
| Peptide -10lgP           | ≥35.7 |
| PTM Ascore               | ≥20   |
| Protein -10lgP           | ≥20   |
| Proteins unique peptides | ≥1    |
| De novo score(%)         | ≥50%  |

**Table 3.** Statistics of filtered result.

|                                |      |
|--------------------------------|------|
| FDR (Peptide-Spectrum Matches) | 0.5% |
|--------------------------------|------|

**Figure 6.** Precursor mass error of peptide-spectrum matches (PSM) in filtered result. (a) Distribution of precursor mass error in ppm; (b) Scatterplot of precursor m/z versus precursor mass error in ppm. ?

|                         |       |
|-------------------------|-------|
| FDR (Peptide Sequences) | 0.8%  |
| FDR (Protein Group)     | 20.0% |
| De Novo Only Spectra    | 112   |

### 3. Experiment Control

**Table 4.** PTM profile.

| Name            | ΔMass | Position | #PSM  | -10lgP  | Abundance | AScore  | Oxidation |
|-----------------|-------|----------|-------|---------|-----------|---------|-----------|
| 15.99 M         | 20    | 119.27   | 2.3E5 | 1000.00 |           |         |           |
| Carbamidomethyl | 57.02 | C        | 7     | 108.46  | 1.23E4    | 1000.00 |           |

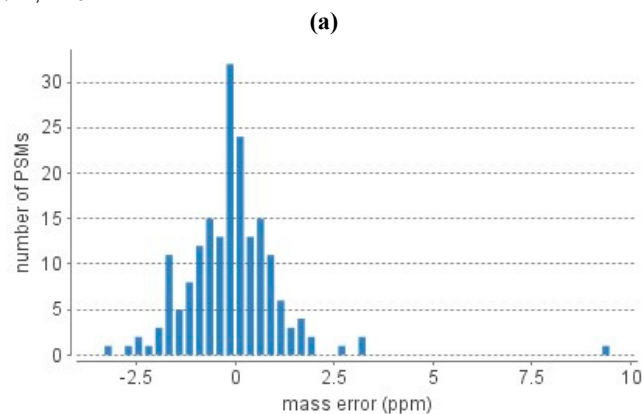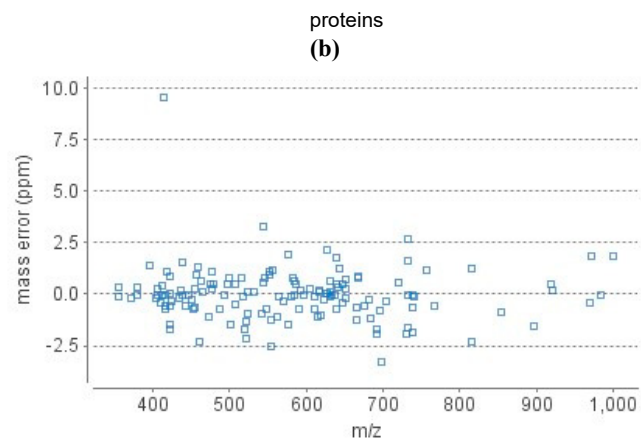

**Table 5.** Number of identified peptides in each sample by the number of missed cleavages.

Missed Cleavages 0 1 2 3 4+ Gastric RAW 15 99 22 1 0 0

## 4. Other Information

**Table 6.** Search parameters.

PEAKS Version: PEAKS Studio 10.6 build 20201015

Search Engine Name: PEAKS

Parent Mass Error Tolerance: 10.0 ppm

Fragment Mass Error Tolerance: 0.02 Da

Precursor Mass Search Type: monoisotopic

Enzyme: Trypsin

Max Missed Cleavages: 2

Digest Mode: Semispecific

Fixed Modifications:

Carbamidomethylation: 57.02

Variable Modifications:

Oxidation (M): 15.99

Deamidation (NQ): 0.98

Acetylation (K): 42.01

Acetylation (Protein N-term): 42.01

Acetylation (N-term): 42.01

Amidation: -0.98

Beta-methylthiolation: 45.99

Biotinylation: 226.08 and 303

more...

Max Variable PTM Per Peptide: 3

Database: Corylus aveliana iz 2020 od 156 KB

Taxon: All

Contaminant Database: crap

**Table 7.** Instrument parameters.

Fractions: 15y.raw  
 Ion Source: ESI(nano-spray)  
 Fragmentation Mode: CID, CAD(y and b ions)  
 MS Scan Mode: FT-ICR/Orbitrap  
 Searched Entry: 602  
 FDR Estimation: Enabled  
 De novo score(%) threshold: 15  
 Peptide hit threshold (-10logP): 30.0  
 Peaks run ID: 112  
 Merge Options: no merge  
 Precursor Options: corrected  
 Charge Options: no correction  
 Filter m/z: 200.0 - 2000.0  
 Filter Charge: 2 - 8  
 Process: true  
 Associate chimera: yes

MS/MS Scan Mode: FT-ICR/Orbitrap

## Protein List

Protein Accession Contains:  
 Protein Description Contains:  
 Protein Sample Area >=  
 Protein PTM Contains:

| Protein Group    | Protein ID | Accession                                   | -10lgP | Coverage (%) | Coverage (%) Gastric RAW 15 | Area Gastric RAW 15 | #Peptides | #Unique | #Spec Gastric RAW 15 | PTM | Avg. Mass | Description                                                                        |
|------------------|------------|---------------------------------------------|--------|--------------|-----------------------------|---------------------|-----------|---------|----------------------|-----|-----------|------------------------------------------------------------------------------------|
| 6                | 10069      | <a href="#">sp Q9ATH2 NLTP_CORAV</a>        | 267.57 | 50           | 50                          | 1.7989E6            | 7         | 7       | 15                   | Y   | 11806     | Non-specific lipid-transfer protein Cor a 8 OS=Corylus avellana OX=13451 PE=1 SV=1 |
| 9                | 10065      | <a href="#">A0A0A0P7E3 A0A0A0P7E3_CORAV</a> | 226.18 | 17           | 17                          | 6.4707E3            | 9         | 1       | 9                    | N   | 58837     | Cor a 9 allergen OS=Corylus avellana OX=13451 PE=2 SV=1                            |
| 8                | 10066      | <a href="#">Q8W1C2 Q8W1C2_CORAV</a>         | 221.80 | 16           | 16                          | 9.5282E5            | 9         | 1       | 9                    | Y   | 59127     | 11S globulin-like protein OS=Corylus avellana OX=13451 PE=2 SV=1                   |
| 13               | 9619       | <a href="#">Q8S4P9 Q8S4P9_CORAV</a>         | 78.90  | 2            | 2                           | 2.4963E4            | 1         | 1       | 1                    | N   | 50856     | 48-kDa glycoprotein OS=Corylus avellana OX=13451 PE=2 SV=1                         |
| 15               | 10135      | <a href="#">Q84T21 Q84T21_CORAV</a>         | 38.43  | 5            | 5                           | 0                   | 1         | 1       | 1                    | Y   | 16698     | Oleolin OS=Corylus avellana OX=13451 PE=2 SV=2                                     |
| total 5 proteins |            |                                             |        |              |                             |                     |           |         |                      |     |           |                                                                                    |

**sp|Q9ATH2|NLTP\_CORAV**[back to list](#)[| Protein Coverage](#) | [| Supporting Peptides](#) |**Protein Coverage:**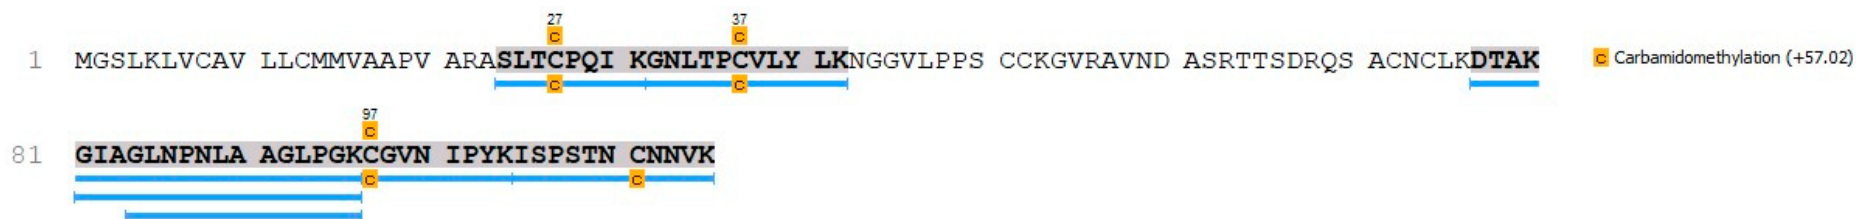**Supporting Peptides:**

| Peptide                   | Uniq | -10lgP | Mass      | Length | ppm  | m/z      | z | RT    | Fraction | Scan | Source File | Area Gastric RAW 15 | #Feature | #Feature Gastric RAW 15 | Start | End | PTM                  | AScore                          | Found By |
|---------------------------|------|--------|-----------|--------|------|----------|---|-------|----------|------|-------------|---------------------|----------|-------------------------|-------|-----|----------------------|---------------------------------|----------|
| Peptide                   | Uniq | -10lgP | Mass      | Length | ppm  | m/z      | z | RT    | Fraction | Scan | Source File | Area Gastric RAW 15 | #Feature | #Feature Gastric RAW 15 | Start | End | PTM                  | AScore                          | Found By |
| K.GIAGLNPPLAAGLPGK.C      | Y    | 113.04 | 1461.8303 | 16     | 0.0  | 731.9224 | 2 | 11.88 | 18       | 4722 | 15y.raw     | 1.3108E6            | 1        | 1                       | 81    | 96  |                      |                                 | PEAKS DB |
| K.DTAKGIAGLNPPLAAGLPGK.C  | Y    | 110.35 | 1877.0370 | 20     | 0.0  | 626.6863 | 3 | 11.53 | 18       | 4573 | 15y.raw     | 8.1313E3            | 1        | 1                       | 77    | 96  |                      |                                 | PEAKS DB |
| K.C(+57.02)GVNIPYK.I      | Y    | 108.46 | 949.4691  | 8      | 0.5  | 475.7421 | 2 | 9.99  | 18       | 3962 | 15y.raw     | 1.233E4             | 1        | 1                       | 97    | 104 | Carbamidomethylation | C1:Carbamidomethylation:1000.00 | PEAKS DB |
| K.GIAGLNP(+.98)LAAGLPGK.C | Y    | 105.00 | 1462.8143 | 16     | 2.7  | 732.4164 | 2 | 12.07 | 18       | 4788 | 15y.raw     | 4.4999E4            | 1        | 1                       | 81    | 96  |                      | N8:Deamidation (N Q):14.04      | PEAKS DB |
| K.GNLTPC(+57.02)VLYLK.N   | Y    | 104.99 | 1276.6849 | 11     | 0.5  | 639.3500 | 2 | 11.88 | 18       | 4699 | 15y.raw     | 1.1064E5            | 1        | 1                       | 32    | 42  | Carbamidomethylation | C6:Carbamidomethylation:1000.00 | PEAKS DB |
| A.GLNPPLAAGLPGK.C         | Y    | 87.93  | 1220.6876 | 13     | -0.1 | 611.3510 | 2 | 10.95 | 18       | 4335 | 15y.raw     | 2.9769E4            | 1        | 1                       | 84    | 96  |                      |                                 | PEAKS DB |
| A.SLTC(+57.02)PQIK.G      | Y    | 66.61  | 945.4954  | 8      | -1.1 | 473.7545 | 2 | 9.37  | 18       | 3699 | 15y.raw     | 1.2946E5            | 1        | 1                       | 24    | 31  | Carbamidomethylation | C4:Carbamidomethylation:1000.00 | PEAKS DB |
| K.ISPSTNC(+57.02)NNVK     | Y    | 57.82  | 1232.5819 | 11     | 0.2  | 617.2983 | 2 | 7.78  | 18       | 3090 | 15y.raw     | 1.546E4             | 1        | 1                       | 105   | 115 | Carbamidomethylation | C7:Carbamidomethylation:1000.00 | PEAKS DB |

|                                 |   |       |           |    |      |          |   |       |    |      |         |          |   |   |    |    |                      |                                                                    |           |
|---------------------------------|---|-------|-----------|----|------|----------|---|-------|----|------|---------|----------|---|---|----|----|----------------------|--------------------------------------------------------------------|-----------|
| K.GNLTP(+15.99)C(+57.02)VLYLK.N | Y | 36.14 | 1292.6798 | 11 | -0.4 | 647.3469 | 2 | 11.68 | 18 | 4614 | 15y.raw | 1.3733E5 | 1 | 1 | 32 | 42 | Carbamidomethylation | P5:Oxidation or Hydration: 19.86;C6: Carbamidomethylation: 1000.00 | PEAKS PTM |
| total 9 peptides                |   |       |           |    |      |          |   |       |    |      |         |          |   |   |    |    |                      |                                                                    |           |

AOA0A0P7E3|AOA0A0P7E3\_CORAV

back to list

| [Protein Coverage](#) | [Supporting Peptides](#) |

Protein Coverage:

1 MAKLILVSFS LCLLVLFNGC LGIDVGLRRQ QQRHFGECNL DRLNALEPTN RIEAEAGQIE SWDHNDQQFQ CAGVAVIRRT

81 IEPNGLLLPQ YSNAPELIYI ERGRGITGVL FPGCPETFED PQQSQQQQG QGQSQRSEQD RHQKIRYFQE GDIIALPAGV

161 AHWCYNDGDS PVVAVSLTHT NNYANQLDEN PRHFYLAGNP DDEHQRRQQQ QFGQRRRQQQ HSRGKEGEQE QQGEGNNVFS

241 GFDAEF LADA FNVDVDTARR LQSNQDKRRN IVKVEGR LQM VRPERSRQEW ERQERQERES EQERERQRRQ GGRGRDVNGF

321 EETICSLRLM ENIGSRSRAD IYTEQVGRIN TVNSNTLPVL RWLQLSAERG DLQREGLYVP HWNLNAHSVY YAIRGRARVQ

401 VVDDNGNTVF DDELRRGQVL TIPQNFVAK RAESEGFQWV AFKTNDNAQI SPLAGRTSAI RALPDDVLAN AFQISREEAR

481 RLKYNRQETT LARSSRSSE RMRRRSESEG RAEA

Supporting Peptides:

| Peptide             | Uniq | -10lgP | Mass      | Length | ppm  | m/z      | z | RT    | Fraction | Scan | Source File | Area Gastric RAW 15 | #Feature | #Feature Gastric RAW 15 | Start | End | PTM | AScore | Found By |
|---------------------|------|--------|-----------|--------|------|----------|---|-------|----------|------|-------------|---------------------|----------|-------------------------|-------|-----|-----|--------|----------|
| R.INTVNSNTLPVLR.W   | N    | 90.95  | 1439.8096 | 13     | 0.6  | 720.9125 | 2 | 11.21 | 18       | 4449 | 15y.raw     | 1.6311E4            | 1        | 1                       | 349   | 361 |     |        | PEAKS DB |
| L.ANAFQISR.E        | N    | 81.73  | 905.4719  | 8      | 0.2  | 453.7433 | 2 | 9.82  | 18       | 3888 | 15y.raw     | 3.1768E4            | 1        | 1                       | 469   | 476 |     |        | PEAKS DB |
| F.LADAFNVDVDTAR.R   | N    | 78.66  | 1405.6837 | 13     | -0.4 | 703.8489 | 2 | 11.39 | 18       | 4512 | 15y.raw     | 0                   | 0        | 0                       | 247   | 259 |     |        | PEAKS DB |
| R.ARVQVVDDNGNTVF.D  | N    | 72.36  | 1532.7583 | 14     | -0.6 | 767.3860 | 2 | 11.02 | 18       | 4365 | 15y.raw     | 1.852E4             | 1        | 1                       | 397   | 410 |     |        | PEAKS DB |
| K.YNRQETTLAR.S      | Y    | 70.13  | 1250.6367 | 10     | 1.1  | 417.8866 | 3 | 7.74  | 18       | 3066 | 15y.raw     | 6.4707E3            | 1        | 1                       | 484   | 493 |     |        | PEAKS DB |
| R.ALPPDVLANAFQISR.E | N    | 66.69  | 1628.8522 | 15     | -2.3 | 815.4315 | 2 | 13.43 | 18       | 5316 | 15y.raw     | 9.7378E3            | 1        | 1                       | 462   | 476 |     |        | PEAKS DB |
| R.ADIYEQVGR.I       | N    | 66.51  | 1150.5618 | 10     | -1.5 | 576.2873 | 2 | 9.70  | 18       | 3841 | 15y.raw     | 0                   | 0        | 0                       | 339   | 348 |     |        | PEAKS DB |



|                  |   |       |           |   |     |          |   |      |    |      |         |         |   |   |     |     |  |          |
|------------------|---|-------|-----------|---|-----|----------|---|------|----|------|---------|---------|---|---|-----|-----|--|----------|
| R.NIVKVEGR.L     | N | 50.51 | 913.5345  | 8 | 1.3 | 457.7751 | 2 | 7.91 | 18 | 3129 | 15y.raw | 0       | 0 | 0 | 270 | 277 |  | PEAKS DB |
| A.FQISREEAR.R    | N | 49.70 | 1134.5781 | 9 | 0.0 | 379.2000 | 3 | 8.64 | 18 | 3413 | 15y.raw | 1.319E5 | 1 | 1 | 472 | 480 |  | PEAKS DB |
| total 9 peptides |   |       |           |   |     |          |   |      |    |      |         |         |   |   |     |     |  |          |

Q8W1C2|Q8W1C2\_CORAV

[back to list](#)

| [Protein Coverage](#) | [Supporting Peptides](#) |

Protein Coverage:

1

MAKLILVSFS LCLLVLFNGC LGINVGLRRQ QQRYFGECNL DRLNALEPTN RIEAEACQIE SWDHNDQQFQ CAGVAVIRRT

Pyro-glu from Q (-17.03)

81

IEPNGLLLPQ YSNAPELIYI ERGRGITGVL FPGCPETFED PQQQSQQGQR QGQGSQRSE QDRHQKIRHF REGDIIALPA

161

GVAHWCYNDG DSPVVTVSL LHTNNYANQLD ENPRHFYLAG NPDDEHQRRQ QQQFGQRRRQ QQHSHGEQGE QEQQGEGNNV

241

FSGFDAEF**LA DAFNVDVDTA** RRLQSNQDKR **RNIVKVEGR** **QVVRPER**SRQ EWERQERQER ESEQERERQR RQGGRGRDVN

321

GFEETICSLR LRENICTRSR **ADIYTEQVGR** **INTVNSNTLP** VLRWLQLSAE RGD LQREGLY VPHWNLNAHS VVYAIRGR**AR**

401

**VQVVDDNGNT** **VF**DDEL RQGQ VLTIPQNF AV AKRAESEGFE WVAFKTNDNA QISPLAGRTS AIR**ALPDDVL** **ANAFQISREE**

481

**AR**RLKYNRQE TTLVRSSRSS SERKRRSESE GRAEA

Supporting Peptides:

| Peptide             | Uniq | -10lgP | Mass      | Length | ppm  | m/z      | z | RT    | Fraction | Scan | Source File | Area Gastric RAW 15 | #Feature | #Feature Gastric RAW 15 | Start | End | PTM | AScore | Found By |
|---------------------|------|--------|-----------|--------|------|----------|---|-------|----------|------|-------------|---------------------|----------|-------------------------|-------|-----|-----|--------|----------|
| R.INTVNSNTLPVLR.W   | N    | 90.95  | 1439.8096 | 13     | 0.6  | 720.9125 | 2 | 11.21 | 18       | 4449 | 15y.raw     | 1.6311E4            | 1        | 1                       | 351   | 363 |     |        | PEAKS DB |
| total 9 peptides    |      |        |           |        |      |          |   |       |          |      |             |                     |          |                         |       |     |     |        |          |
| Peptide             | Uniq | -10lgP | Mass      | Length | ppm  | m/z      | z | RT    | Fraction | Scan | Source File | Area Gastric RAW 15 | #Feature | #Feature Gastric RAW 15 | Start | End | PTM | AScore | Found By |
| L.ANAFQISR.E        | N    | 81.73  | 905.4719  | 8      | 0.2  | 453.7433 | 2 | 9.82  | 18       | 3888 | 15y.raw     | 3.1768E4            | 1        | 1                       | 471   | 478 |     |        | PEAKS DB |
| F.LADAFNVDVTAR.R    | N    | 78.66  | 1405.6837 | 13     | -0.4 | 703.8489 | 2 | 11.39 | 18       | 4512 | 15y.raw     | 0                   | 0        | 0                       | 249   | 261 |     |        | PEAKS DB |
| R.ARVQVVDDNGNTVF.D  | N    | 72.36  | 1532.7583 | 14     | -0.6 | 767.3860 | 2 | 11.02 | 18       | 4365 | 15y.raw     | 1.852E4             | 1        | 1                       | 399   | 412 |     |        | PEAKS DB |
| R.ALPDDVLANAFQISR.E | N    | 66.69  | 1628.8522 | 15     | -2.3 | 815.4315 | 2 | 13.43 | 18       | 5316 | 15y.raw     | 9.7378E3            | 1        | 1                       | 464   | 478 |     |        | PEAKS DB |
| R.ADIYTEQVGR.I      | N    | 66.51  | 1150.5618 | 10     | -1.5 | 576.2873 | 2 | 9.70  | 18       | 3841 | 15y.raw     | 0                   | 0        | 0                       | 341   | 350 |     |        | PEAKS DB |

|                     |   |       |           |   |      |          |   |      |    |      |         |          |   |   |     |     |                 |                            |           |
|---------------------|---|-------|-----------|---|------|----------|---|------|----|------|---------|----------|---|---|-----|-----|-----------------|----------------------------|-----------|
| R.NIVKVEGR.L        | N | 50.51 | 913.5345  | 8 | 1.3  | 457.7751 | 2 | 7.91 | 18 | 3129 | 15y.raw | 0        | 0 | 0 | 272 | 279 |                 |                            | PEAKS DB  |
| A.FQISREEAR.R       | N | 49.70 | 1134.5781 | 9 | 0.0  | 379.2000 | 3 | 8.64 | 18 | 3413 | 15y.raw | 1.319E5  | 1 | 1 | 474 | 482 |                 |                            | PEAKS DB  |
| L.Q(-17.03)VVRPER.S | Y | 38.22 | 865.4770  | 7 | -0.2 | 433.7457 | 2 | 8.55 | 18 | 3385 | 15y.raw | 9.5282E5 | 1 | 1 | 281 | 287 | Pyro-glu from Q | Q1:Pyro-glu from Q:1000.00 | PEAKS PTM |
| total 9 peptides    |   |       |           |   |      |          |   |      |    |      |         |          |   |   |     |     |                 |                            |           |

Q8S4P9|Q8S4P9\_CORAV

[back to list](#)

| [Protein Coverage](#) | [Supporting Peptides](#) |

Protein Coverage:

1 MLPKEDPELK KCKHKCRDER QFDEQQRRDG KQICEEKARE RQQEEGNSSE ESYGKEQEEN PYVFQDEHFE SRVKTEEGRV  
81 QVLENFTKRS RLLSGIENFR LAILEANPHT FISP AHF DAE LVL FVAKGRA TITMVREEKR ESNVEHGDI IRIPAGTPVY  
161 MINRDENEKL FIVKILQPVSA PGHFEAFYAG AGGEDPESFY RAFSWEVLEA ALKVRREQLE KVFGEQSKGS IVKASREKIR  
241 ALSQHEEGPP RIWPFGGESS GPINLLHKHP SQSNQFGRLY EAH PDDHKQL QDL DLMVSFA NITKGSMAGP YYNSRATKIS  
321 VVVEGEGFFE MACPHLSSSS GSYQKISARL RRGVV FVAPA GHPVAVIASQ NNNLQVLCFE VNAHGNSRFP LAGKGNIVNE  
401 FERDAKELAF NLP SREVERI FKNQDQAFFP GPGNKQQEEG GRGGRAFE

Supporting Peptides:

| Peptide          | Uniq | -10lgP | Mass      | Length | ppm | m/z      | z | RT    | Fraction | Scan | Source File | Area Gastric RAW 15 | #Feature | #Feature Gastric RAW 15 | Start | End | PTM | AScore | Found By |
|------------------|------|--------|-----------|--------|-----|----------|---|-------|----------|------|-------------|---------------------|----------|-------------------------|-------|-----|-----|--------|----------|
| K.ILQPVSA PGHFE  | Y    | 78.90  | 1164.6292 | 11     | 0.6 | 583.3222 | 2 | 11.17 | 18       | 4423 | 15y.raw     | 2.4963E4            | 1        | 1                       | 175   | 185 |     |        | PEAKS DB |
| total 1 peptides |      |        |           |        |     |          |   |       |          |      |             |                     |          |                         |       |     |     |        |          |

Q84T21|Q84T21\_CORAV

[back to list](#)

| [Protein Coverage](#) | [Supporting Peptides](#) |

Protein Coverage:

1 MADRPQQLQV HPQRGHGHYE GGIKNQ RGGG P SAVKMAVL AALPVGGTLL ALAGLTLAGS VIGLLVTSPL FIIFSPVLVP  Carbamidomethylation (+57.02)  
81 AAIVVGLAVA SFLSSGALGL TGLSSLSWVL NYLR CASQSLPREMDQAKRR MQDMAAFVGQ KTREVGQEIQ SRAQEGRRT

Supporting Peptides:

| Peptide              | Uniq | -10lgP | Mass     | Length | ppm  | m/z      | z | RT   | Fraction | Scan | Source File | Area Gastric RAW 15 | #Feature | #Feature Gastric RAW 15 | Start | End | PTM                  | AScore                          | Found By |
|----------------------|------|--------|----------|--------|------|----------|---|------|----------|------|-------------|---------------------|----------|-------------------------|-------|-----|----------------------|---------------------------------|----------|
| R.C(+57.02)ASQSLPR.E | Y    | 38.43  | 917.4389 | 8      | -2.3 | 459.7257 | 2 | 8.25 | 18       | 3263 | 15y.raw     | 0                   | 0        | 0                       | 115   | 122 | Carbamidomethylation | C1:Carbamidomethylation:1000.00 | PEAKS DB |



total 1 peptides

Peptide List

Prepared with PEAKS™ (bioinform.com)

## Summary

# 1. Notes

Spot 15 from roasted digested hazelnut

## 2. Result Statistics

**Figure 1.** False discovery rate (FDR) curve. X axis is the number of peptides being kept. Y axis is the corresponding FDR. ?

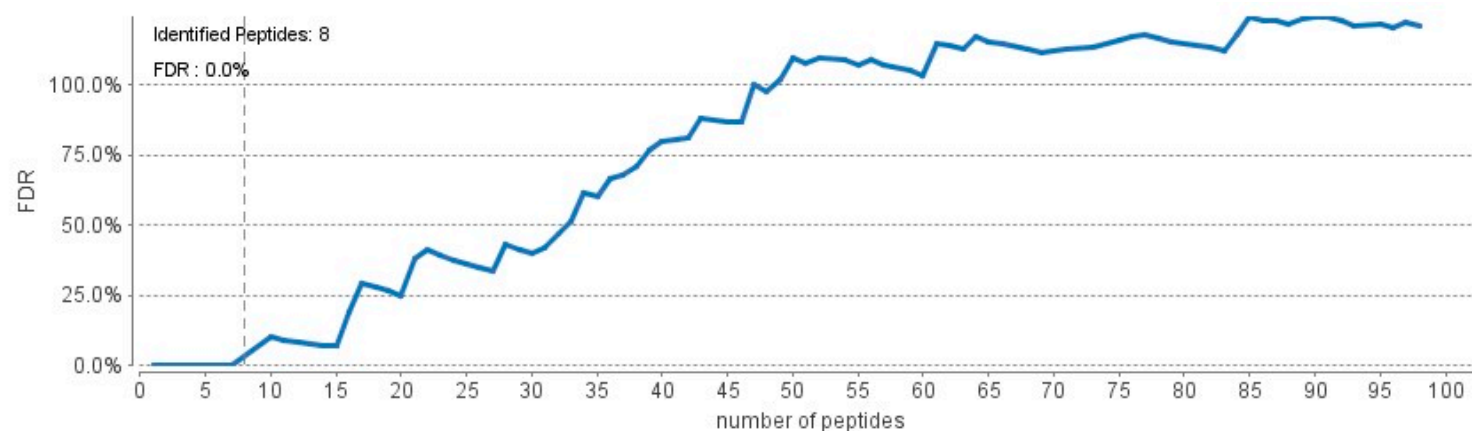

**Figure 2.** PSM score distribution. **(a)** Distribution of PEAKS peptide score; **(b)** Scatterplot of PEAKS peptide score versus precursor mass error. ?

**(a)**

**(b)**

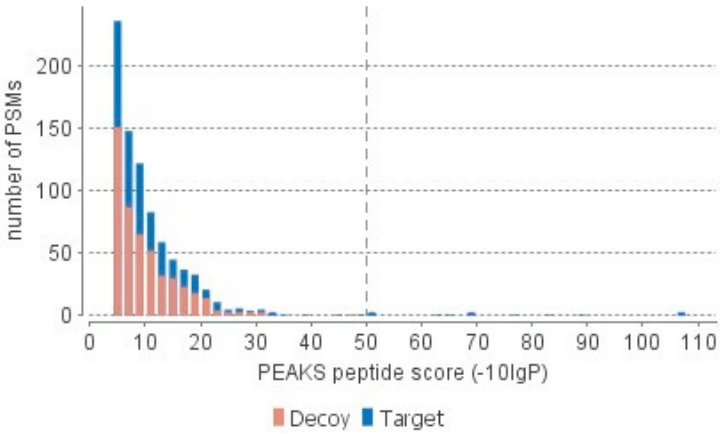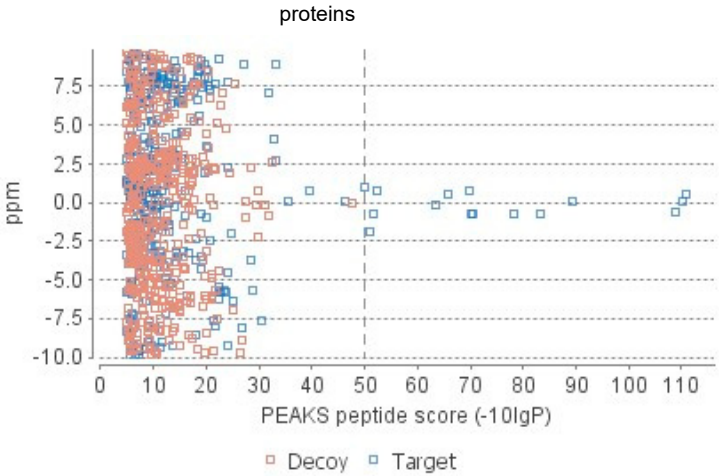

Table 1. Statistics of data.

|                          | #Scans |       |          | #Features | Identified |        |             | #Peptides | #Sequences | #Proteins* |     |     |
|--------------------------|--------|-------|----------|-----------|------------|--------|-------------|-----------|------------|------------|-----|-----|
|                          | MS1    | MS/MS | #Chimera |           | #PSMs      | #Scans | #Features** |           |            | Groups     | All | Top |
| Total                    | 4721   | 4211  | 5        | 2403      | 14         | 14     | 5           | 8         | 8          | 1          | 1   | 1   |
| Gastric<br>RAOSTED<br>13 | 4721   | 4211  | 5        | 2403      | 14         | 14     | 5           | 8         | 8          | 1          | 1   | 1   |

\* proteins with significant peptides are used in counts.

\*\* features are identified by DB search only.

Figure 3. Sample overlap for Proteins and Peptides (up to 8 samples). (a) All Proteins; (b) Top Proteins; (c) Peptides; ?

(a)

Not applicable to only one sample

(b)

Not applicable to only one sample

(c)

Not applicable to only one sample

Figure 4. Distribution of peptide feature detection. (a) Feature m/z distribution; (b) Feature RT distribution.

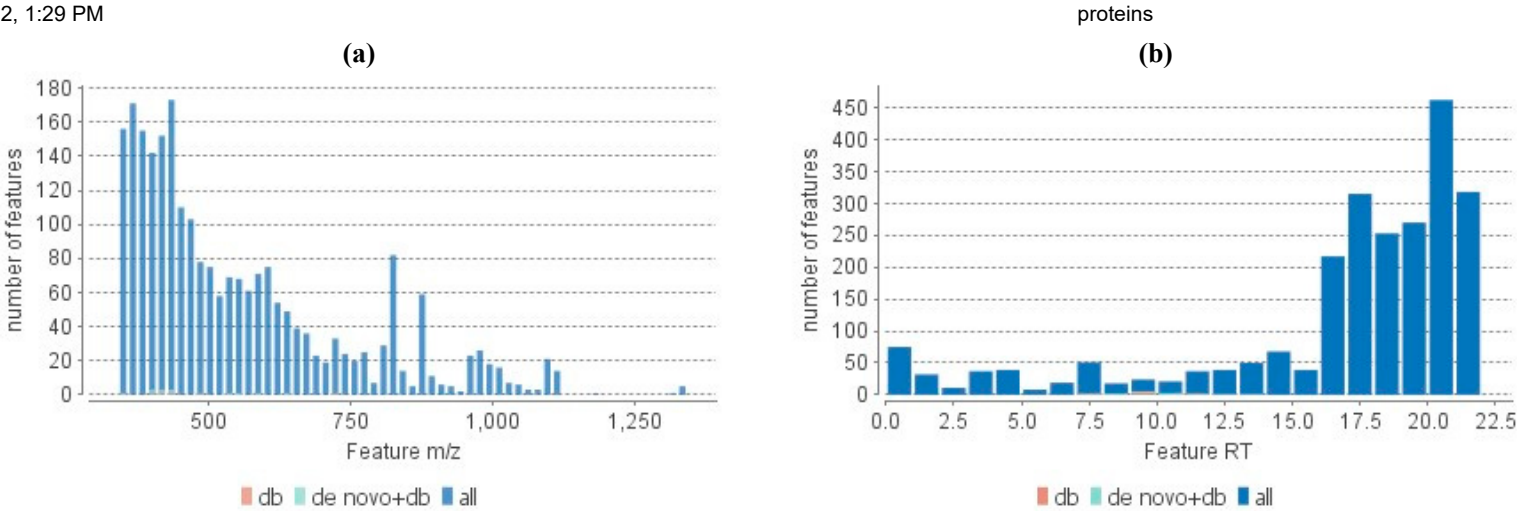

**Figure 5.** Distribution of identified peptide features. **(a)** Feature abundance distribution; **(b)** *De novo* sequencing validation. [?](#)

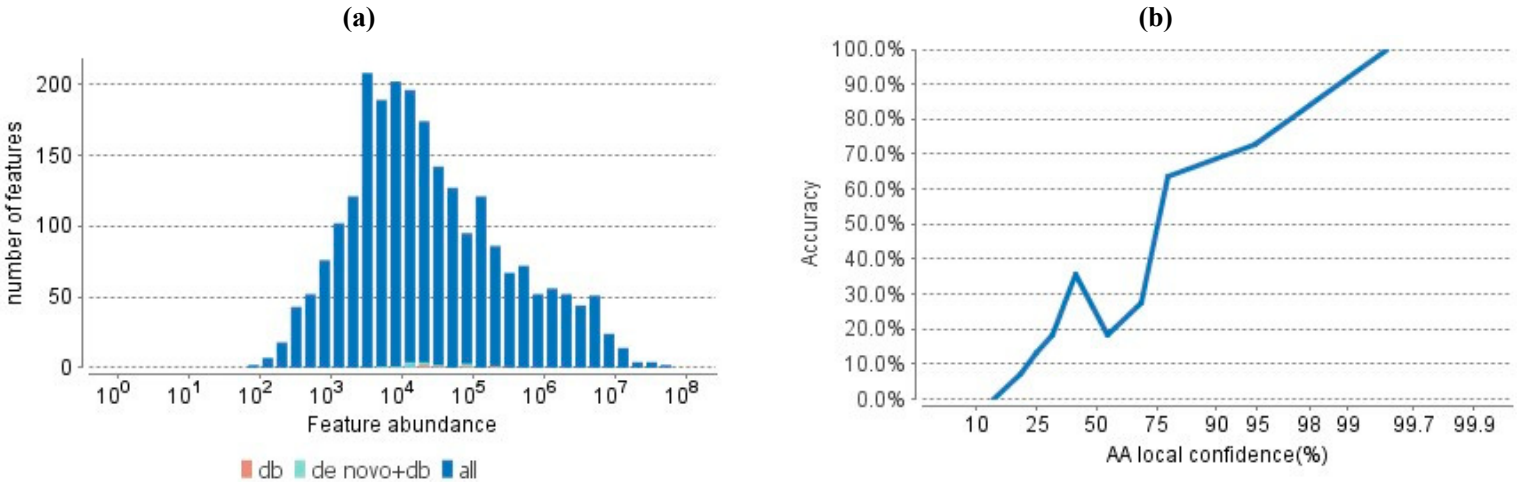

**Table 2.** Result filtration parameters.

Peptide -10lgP  $\geq 50.1$   
PTM Ascore  $\geq 20$

|                          |      |
|--------------------------|------|
| Protein -10lgP           | ≥20  |
| Proteins unique peptides | ≥1   |
| De novo score(%)         | ≥50% |

|                    |   |          |   |   |    |  |
|--------------------|---|----------|---|---|----|--|
|                    |   | proteins |   |   |    |  |
| Missed Cleavages   | 0 | 1        | 2 | 3 | 4+ |  |
| Gastric RAOSTED 13 | 6 | 2        | 0 | 0 | 0  |  |

Table 3. Statistics of filtered result.

Table 4. PTM profile.

|                                |      |
|--------------------------------|------|
| FDR (Peptide-Spectrum Matches) | 0.0% |
| FDR (Peptide Sequences)        | 0.0% |
| FDR (Protein Group)            | 0.0% |
| De Novo Only Spectra           | 92   |

### 3. Experiment Control

Figure 6. Precursor mass error of peptide-spectrum matches (PSM) in filtered result. (a) Distribution of precursor mass error in ppm; (b) Scatterplot of precursor m/z versus precursor mass error in ppm. ?

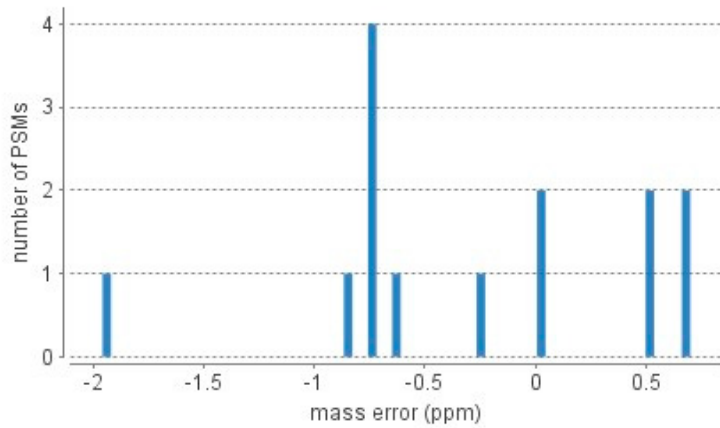

(a)

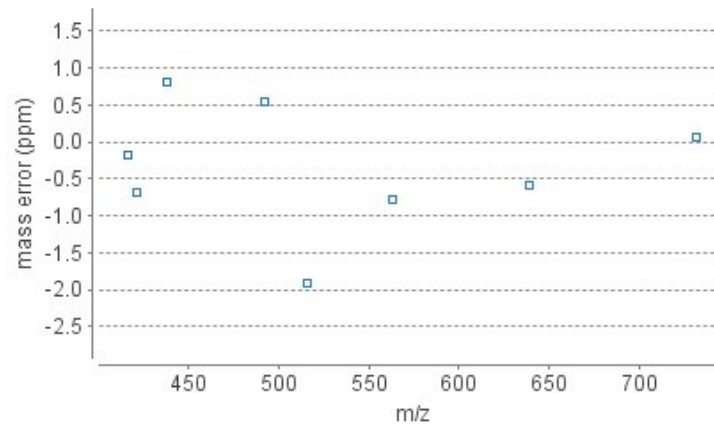

(b)

Table 5. Number of identified peptides in each sample by the number of missed cleavages.

| Name      | ΔMass  | Position |
|-----------|--------|----------|
| #PSM      | -10lgP |          |
| Abundance | AScore |          |

Table 6. Search parameters.

PEAKS Version: PEAKS Studio 10.6 build 20201015  
Search Engine Name: PEAKS

Parent Mass Error Tolerance: 10.0  
ppm

Database: Corylus aveliana iz 2020 od 156 KB  
Taxon: All  
Contaminant Database: crap  
Searched Entry: 602  
FDR Estimation: Enabled  
De novo score(%) threshold: 15  
Peptide hit threshold (-10logP): 30.0  
Peaks run ID: 119  
Merge Options: no merge  
Precursor Options: corrected  
Charge Options: no correction  
Filter m/z: 200.0 - 2000.0  
Filter Charge: 2 - 8  
Process: true  
Associate chimera: yes

**Table 7.** Instrument parameters.

Fractions: 13d.raw  
Ion Source: ESI(nano-spray)  
Fragmentation Mode: CID, CAD(y  
and b ions) Fragment Mass Error  
Tolerance: 0.02 Da  
Precursor Mass Search Type:  
monoisotopic  
Enzyme: Trypsin  
Max Missed Cleavages: 2  
Digest Mode:  
Semispecific Fixed  
Modifications:  
Carbamidomethylation  
n: 57.02 Variable

### Protein List

| Protein Group | Protein ID | Accession | -<br>10lgP | Coverage (%) | Coverage (%)<br>Gastric RASTED 13 | Area Gastric<br>RASTED 13 | #Peptides | #Unique | #Spec Gastric<br>RASTED 13 | PTM | Avg.<br>Mass | Description |
|---------------|------------|-----------|------------|--------------|-----------------------------------|---------------------------|-----------|---------|----------------------------|-----|--------------|-------------|
|---------------|------------|-----------|------------|--------------|-----------------------------------|---------------------------|-----------|---------|----------------------------|-----|--------------|-------------|

**total 1 proteins**

Modifications:

Oxidation (M): 15.99

Deamidation (NQ): 0.98

Acetylation (K): 42.01

Acetylation (Protein N-term):  
42.01

Acetylation (N-term): 42.01

Amidation: -0.98

Beta-  
methylthiolation:

45.99 Biotinylation:

226.08 and 303

more... Max Variable

PTM Per Peptide: 3

Protein Accession Contains:

Protein Description Contains:

Protein Sample Area >= Protein PTM Contains:

MS Scan Mode: FT-ICR/Orbitrap MS/MS Scan

Mode: FT-ICR/Orbitrap

| Protein Group    | Protein ID | Accession            | -10lgP | Coverage (%) | Coverage (%) Gastric RASTED 13 | Area Gastric RASTED 13 | #Peptides | #Unique | #Spec Gastric RASTED 13 | PTM | Avg. Mass | Description                                                                            |
|------------------|------------|----------------------|--------|--------------|--------------------------------|------------------------|-----------|---------|-------------------------|-----|-----------|----------------------------------------------------------------------------------------|
| 4                | 10069      | sp Q9ATH2 NLTP_CORAV | 135.37 | 14           | 14                             | 9.3628E4               | 1         | 1       | 2                       | N   | 11806     | Non-specific lipid-transfer protein Cor a 8 O<br>S=Corylus avellana OX=13451 PE=1 SV=1 |
| total 1 proteins |            |                      |        |              |                                |                        |           |         |                         |     |           |                                                                                        |

sp|Q9ATH2|NLTP\_CORAV

back to list

| [Protein Coverage](#) | [Supporting Peptides](#) | [Protein](#)

Coverage:

1 MGSLKLVCAV LLCMMVAAPV ARASLTCPQI KGNLTPCVLY LKNGGVLPPS CCKGVRAVND ASRTTSDRQS ACNCLKDTAK

81 GIAGLNPNLA AGLPGKCGVN IPYKISPSTN CNNVK

Supporting Peptides:

| Peptide          | Uniq | -10lgP | Mass      | Length | ppm | m/z      | z | RT    | Fraction | Scan | Source File | Area Gastric RASTED 13 | #Feature | #Feature Gastric RASTED 13 | Start | End | PTM | AScore | Found By |
|------------------|------|--------|-----------|--------|-----|----------|---|-------|----------|------|-------------|------------------------|----------|----------------------------|-------|-----|-----|--------|----------|
| K.GIAGLNP        | Y    | 110.33 | 1461.8303 | 16     | 0.1 | 731.9225 | 2 | 11.85 | 11       | 4660 | 13d.raw     | 9.3628E4               | 1        | 1                          | 81    | 96  |     |        | PEAKS DB |
| total 1 peptides |      |        |           |        |     |          |   |       |          |      |             |                        |          |                            |       |     |     |        |          |

[Peptide List](#)
